# Supplementary material for: Exoskeletal-Assisted Walking in Veterans With Paralysis: A Randomized Clinical Trial
Source: PubMed Central journal article supplement (PMC11375472; doi:10.1001/jamanetworkopen.2024.31501), 2024-09-04
Supplement: jamanetwopen-e2431501-s002.pdf [file jamanetwopen-e2431501-s002.pdf]

1  
2  
3  
4  
5  
6  
7  
8  
9  
10  
11  
12  
13  
14  
15  
16  
17  
18  
19  
20  
21  
22  
23  
24  
25  
26  
27

**VA Cooperative Studies Program Protocol #2003**  
**Exoskeletal-Assisted Walking in Persons with SCI: Impact on Quality of Life**

**July 2021**

**Version 7.2**

**Study Chairperson: Ann M. Spungen, Ed.D, JJPVAMC Bronx, NY**  
**Study Co-Chairperson: William A. Bauman, MD, JJPVAMC Bronx, NY**

**- PRIVILEGED AND CONFIDENTIAL -**  
**Not to be Disseminated Beyond Official Use**

28 **TABLE OF CONTENTS**

29 Glossary..... i

30 Executive Committee ..... iii

31 Executive Summary ..... vi

32 **I. Introduction and Background ..... 1**

33     A. Measurement of Quality of Life Outcomes in SCI .....5

34     B. Pilot Data .....9

35     C. Preliminary Data Employed for the Primary Outcome Variables ..... 11

36     D. Supporting Data for the Major Secondary Outcome Variable ..... 13

37     E. Secondary Outcomes ..... 14

38 **II. Objectives..... 17**

39     A. Primary Objectives ..... 17

40     B. Major Secondary Objective ..... 17

41     C. Secondary Objectives ..... 17

42     D. Hypotheses ..... 18

43 **III. Experimental Design ..... 19**

44     A. Screening Phase ..... 19

45     B. Intervention Phase ..... 21

46     C. Post Study Participation for the Control Group ..... 22

47     D. Study Duration and Timeline ..... 22

48 **IV. Participant Recruitment..... 27**

49     A. Recruitment and Screening ..... 27

50     B. Randomization System..... 27

51     C. Population to be Studied..... 28

52 **V. Intervention and Methods of Treatment ..... 28**

53 **VI. Methods of Follow-up..... 29**

54 **VII. Methods of Assuring Uniformity of Intervention..... 30**

55 **VIII. Determining Eligibility ..... 30**

|    |                                                                        |           |
|----|------------------------------------------------------------------------|-----------|
| 56 | A. Inclusion/Eligibility Criteria .....                                | 30        |
| 57 | B. Exclusion Criteria.....                                             | 31        |
| 58 | C. Exoskeleton Component (“Training the Trainers”).....                | 33        |
| 59 | D. ReWalk Fitting .....                                                | 33        |
| 60 | E. EAW Basic Skills Test .....                                         | 34        |
| 61 | F. EAW Walking Skills Progression.....                                 | 35        |
| 62 | G. EAW Companion Training .....                                        | 36        |
| 63 | H. EAW Advanced Skills Test.....                                       | 38        |
| 64 | I. Weekly EAW Activity Log .....                                       | 40        |
| 65 | <b>IX. Outcome Measurements.....</b>                                   | <b>40</b> |
| 66 | A. Primary Outcomes.....                                               | 41        |
| 67 | B. Major Secondary Outcome .....                                       | 41        |
| 68 | C. Secondary Outcomes .....                                            | 41        |
| 69 | D. Additional Assessments .....                                        | 42        |
| 70 | E. Quality Control (non-outcome) Measurements .....                    | 42        |
| 71 | F. Methods for Obtaining Outcome Measures Data.....                    | 43        |
| 72 | G. Schedule of Observations and Laboratory Tests .....                 | 44        |
| 73 | <b>X. Performance Measures and Study Management.....</b>               | <b>44</b> |
| 74 | A. CSPCC .....                                                         | 45        |
| 75 | B. Office of the Chair.....                                            | 45        |
| 76 | <b>XI. Safety Monitoring .....</b>                                     | <b>46</b> |
| 77 | A. Study Group .....                                                   | 46        |
| 78 | B. Executive Committee .....                                           | 47        |
| 79 | C. Data Monitoring Committee.....                                      | 47        |
| 80 | D. VA Central Institutional Review Board (CIRB) .....                  | 47        |
| 81 | E. Definitions of Adverse Event (AE), Serious Adverse Event (SAE), and |           |
| 82 | Unanticipated Adverse Device Effect (UADE).....                        | 48        |
| 83 | F. Serious Adverse Event (SAE) Reporting.....                          | 49        |
| 84 | G. Adverse Event (AE) Reporting .....                                  | 49        |
| 85 | H. Participant Safety Stopping Rules.....                              | 50        |

|     |                                                                            |           |
|-----|----------------------------------------------------------------------------|-----------|
| 86  | I. Site Participation Stopping Rules .....                                 | 51        |
| 87  | J. Efficacy or Futility Criteria for Study Termination.....                | 51        |
| 88  | <b>XII. Quality Assurance Procedures.....</b>                              | <b>52</b> |
| 89  | A. Summary of Monitoring and Auditing Plans .....                          | 52        |
| 90  | <b>XIII. Statistical Analysis Plan (SAP).....</b>                          | <b>53</b> |
| 91  | A. Introduction .....                                                      | 53        |
| 92  | B. Sample Size .....                                                       | 53        |
| 93  | C. Feasibility Phase.....                                                  | 55        |
| 94  | D. Baseline Comparability .....                                            | 56        |
| 95  | E. General Outcome Analysis Guidelines .....                               | 56        |
| 96  | F. Analysis of Primary and Major Secondary Outcome Measures .....          | 56        |
| 97  | G. Secondary Analyses .....                                                | 57        |
| 98  | H. Monitoring of Study by Study Group and Executive Committee .....        | 58        |
| 99  | I. Study Monitoring by the Data Monitoring Committee.....                  | 62        |
| 100 | <b>XIV. Qualifications.....</b>                                            | <b>66</b> |
| 101 | A. Site Qualifications .....                                               | 66        |
| 102 | B. Site Participation.....                                                 | 68        |
| 103 | C. Office of the Chair Qualifications .....                                | 70        |
| 104 | <b>XV. Plans to Assure Security and Confidentiality of Study Data.....</b> | <b>70</b> |
| 105 | <b>XVI. Data Management and Data Security Plans.....</b>                   | <b>71</b> |
| 106 | <b>XVII. Plans for Dissemination of Study Results.....</b>                 | <b>72</b> |
| 107 | A. Publication of Research Results.....                                    | 72        |
| 108 | B. Planned Publications.....                                               | 73        |
| 109 | <b>XVIII. Human Subjects Protection Considerations.....</b>                | <b>74</b> |
| 110 | A. Recruitment of Participants and Special Considerations.....             | 74        |
| 111 | B. Inclusion of Women and Minorities in the Study .....                    | 74        |
| 112 | C. Description of the Consenting Process.....                              | 74        |
| 113 | D. Participant Compensation.....                                           | 75        |
| 114 | E. Safety Considerations .....                                             | 76        |

|     |                                                                                        |           |
|-----|----------------------------------------------------------------------------------------|-----------|
| 115 | F. Foreseeable Risks .....                                                             | 76        |
| 116 | G. Risk Management and Emergency Response .....                                        | 77        |
| 117 | H. Emergency Care Plan .....                                                           | 79        |
| 118 | I. Potential Benefits .....                                                            | 79        |
| 119 | <b>XIX. Transition of Participants .....</b>                                           | <b>80</b> |
| 120 | <b>XX. Impact of the SARS-CoV-2 (COVID-19) pandemic on screened participants .....</b> | <b>81</b> |
| 121 | A. Background .....                                                                    | 81        |
| 122 | B. Rationale .....                                                                     | 82        |
| 123 | C. Methods .....                                                                       | 86        |
| 124 | D. Relevance .....                                                                     | 88        |
| 125 | E. Limitations .....                                                                   | 90        |
| 126 | <b>XXI. References .....</b>                                                           | <b>90</b> |

| <b>Glossary</b> |                                                                            |
|-----------------|----------------------------------------------------------------------------|
| <b>Acronym</b>  | <b>Meaning</b>                                                             |
| 10mWT           | 10 Meter Walk Test                                                         |
| 6minWT          | 6 Minute Walk Test                                                         |
| AD              | Autonomic Dysreflexia                                                      |
| AE              | Adverse Event                                                              |
| AIS             | American Spinal Injury International Standards Scale                       |
| ASIA            | American Spinal Injury Association                                         |
| BE              | Bowel Evacuation                                                           |
| BMD             | Bone Mineral Density                                                       |
| BP              | Blood Pressure                                                             |
| CBC             | Complete Blood Count                                                       |
| CBOCs           | Community Based Outpatient Centers                                         |
| CIRB            | Central Institutional Review Board                                         |
| CRF             | Case Report Form                                                           |
| CRP             | C-Reactive Protein                                                         |
| CSP             | Cooperative Studies Program                                                |
| CSPCC           | Cooperative Studies Program Coordinating Center                            |
| CSPCRPCC        | Cooperative Studies Program Clinical Research Pharmacy Coordinating Center |
| CSSEC           | Cooperative Studies Scientific Evaluation Committee                        |
| DMC             | Data Monitoring Committee                                                  |
| DVA             | Department of Veterans Affairs                                             |
| DXA             | Dual energy X-Absorptiometry                                               |
| EAW             | Exoskeletal-Assisted Walking                                               |
| FDA             | Food and Drug Administration                                               |
| FES             | Functional Electrical Stimulation                                          |
| FIM             | Functional Independence Measurement                                        |
| FPG             | Fasting Plasma Glucose                                                     |
| FTE             | Full Time Equivalent                                                       |
| FWA             | Federal Wide Assurance                                                     |
| FY              | Fiscal Year                                                                |
| GCP             | Good Clinical Practice                                                     |
| H&PE            | Health and Physical Exam                                                   |
| HDL-c           | High Density Lipoprotein cholesterol                                       |
| HIPAA           | Health Insurance Portability and Accountability Act                        |
| HOMA-IR         | Homeostasis Model of Assessment-Insulin Resistance                         |
| HR              | Heart Rate                                                                 |
| HRC             | Human Rights Committee                                                     |
| HRQOL           | Health-Related Quality of Life                                             |
| ICH             | International Conference on Harmonization                                  |
| ISNCSCI         | International Standards for Neurological Classification of SCI             |

|         |                                                          |
|---------|----------------------------------------------------------|
| ITTRS   | Interactive Touch Tone Randomization System              |
| JJPVAMC | James J. Peters VA Medical Center                        |
| LDL-c   | Low Density Lipoprotein cholesterol                      |
| LOA     | Level of Assistance                                      |
| MCS     | Mental Component Summary                                 |
| MID     | Minimally Important Difference                           |
| mL      | Milliliters                                              |
| NCMRR   | National Center for Medical Rehabilitation Research      |
| NIH     | National Institute of Health                             |
| NINDS   | National Institute of Neurological Disorders and Stroke  |
| NODES   | Network of Dedicated Enrollment Sites                    |
| ORO     | Office of Research Oversight                             |
| pg      | Picograms                                                |
| PHI     | Protected Health Information                             |
| PI      | Primary Investigator                                     |
| PMH     | Physical-Medical Health                                  |
| PPE     | Personal Protective Equipment                            |
| PROMIS  | Patient Reported Outcomes Measurement Information System |
| QC      | Quality Control                                          |
| QOL     | Quality of Life                                          |
| RPE     | Rating of Perceived Exertion                             |
| RR&D    | Rehabilitation Research and Development                  |
| SAE     | Serious Adverse Event                                    |
| SCI     | Spinal Cord Injury                                       |
| SCI/D   | Spinal Cord Injury/Disease                               |
| SCI-FI  | Spinal Cord Injury Functional Index                      |
| SD      | Standard Derivative                                      |
| SMART   | Site Monitoring Auditing and Resource Team               |
| SOC     | Standard of Care                                         |
| TC      | Total Cholesterol                                        |
| TG      | Triglycerides                                            |
| TNF     | Tumor Necrosis Factor                                    |
| TUG     | Timed-Up-and Go                                          |
| UADE    | Unanticipated Adverse Device Effect                      |
| U/L     | Units per liter                                          |
| UTI     | Urinary Tract Infection                                  |
| US      | United States                                            |
| VHA     | Veterans Health Administration                           |
| VINCI   | VA Informatics and Computing Infrastructure              |
| VR-36   | Veterans Rand 36                                         |

127 **CSP #2003**

128 **Exoskeletal-Assisted Walking in Persons with SCI: Impact on Quality of Life**

129 **Executive Committee Members**

130  
131 **Ann M. Spungen, EdD, Chairperson**

**James J Peters VA Medical Center  
(JJPVAMC), Bronx, NY**

133 Name Ann M. Spungen, EdD  
134 Title Associate Director, National Center of Excellence for the Medical Consequences  
135 of SCI  
136 Location James J. Peters VA Medical Center  
137 130 West Kingsbridge Road, 7A-13  
138 Bronx, NY 10468  
139 Phone 718.584.9000, x5814 (office)  
140 914.954.3515 (cell)  
141 VA Email ann.spungen@va.gov  
142 nonVA email ann.spungen@gmail.com  
143 Altern. email kenlys.fajardo@va.gov (Dr. Spungen's Administrative Assistant)

144  
145 **William A. Bauman, MD, Co-Chairperson**

**James J Peters VA Medical Center  
(JJPVAMC), Bronx, NY**

147 Name William A. Bauman, MD  
148 Title Director, National Center of Excellence for the Medical Consequences of SCI  
149 Location James J. Peters VA Medical Center  
150 130 West Kingsbridge Road, 7A-13  
151 Bronx, NY 10468  
152 Phone 718-584-9000, x5428 (office)  
153 914-329-4772 (cell)  
154 VA Email william.bauman@va.gov  
155 nonVA email wabauman@earthlink.net  
156 Altern. email kenlys.fajardo@va.gov (Dr. Bauman's Administrative Assistant)

157  
158 **Karen M. Jones, MS, Study Biostatistician**

**Cooperative Studies Program  
Coordinating Center (CSPCC), Perry  
Point VAMC  
Perry Point, MD**

162 Name Karen Jones, MS  
163 Title Biostatistician, CSPCC  
164 Location Cooperative Studies Program Coordinating Center  
165 Department of Veterans Affairs Medical Center  
166 P.O. Box 1010





168 Phone 410-642-2411, x2/5297 (office)  
169 VA Email Karen.jones2@va.gov  
170 nonVA email none  
171 Altern. email none

172  
173 **Sunil Sabharwal, MD, Site Investigator** **VA Boston Healthcare System**  
174 **West Roxbury, MA**

175 Name Sunil Sabharwal, MD  
176 Title Network SCI Director  
177 Location VA Boston Healthcare System  
178 1400 VFW Parkway, SCI-128  
179 West Roxbury, MA 02132  
180 Phone 857-203-6574 (office)  
181 VA Email sunil.sabharwal2@va.gov  
182 nonVA email none  
183 Altern. email marilyn.kendall@va.gov (Dr. Sabharwal's Administrative Assistant)

184  
185 **Lance Goetz, MD, Site Investigator** **Hunter Holmes McGuire VA Medical**  
186 **Center Richmond, VA**

187 Name Lance Goetz, MD  
188 Title Staff Physician, Spinal Cord Injury and Disorders Service  
189 Location Hunter Holmes McGuire VA Medical Center  
190 1201 Broad Rock Blvd  
191 Richmond, VA 23249  
192 Phone 804-675-5455 (office)  
193 VA Email lance.goetz@va.gov  
194 nonVA email none  
195 Altern. email none

196  
197 **Kevin T. White, MD, Site Investigator** **James A. Haley Veterans Hospital**  
198 **Tampa, FL**

199 Name Kevin T. White, MD  
200 Title Chief, Spinal Cord Injury Service  
201 Location James A. Haley Veterans Hospital  
202 13000 Bruce B. Downs Blvd.  
203 Tampa, FL 33612  
204 Phone 813-972-2000, x6400 (office)  
205 813-695-1575 (cell)  
206 VA Email Kevin.White2@va.gov  
207 nonVA email none  
208 Altern. email Gail.Hartmaier@va.gov (Dr. White's Administrative Assistant)

209 **Peter Gorman, MD, Chief, PM&R** **Baltimore VA Medical Center**  
210 **Baltimore, MD**

211 Name Peter Gorman, MD MS  
212 Title Attending Physician, PM&R Service  
213 Location VA Maryland Healthcare System  
214 10 North Greene Street  
215 Baltimore, MD 21201  
216 Phone 410-448-6261 (office)  
217 VA Email peter.gorman@va.gov  
218 nonVA email PGORMAN@umm.edu  
219 Altern. email [LCasey@umm.edu](mailto:LCasey@umm.edu) (Dr. Gorman's Administrative Assistant)

220  
221 **Steven C. Kirshblum, MD, Medical Director** **Kessler Institute for Rehabilitation (KIR)**  
222 **West Orange, NJ**

223 Name Steven C. Kirshblum, MD  
224 Title Medical Director and Director of SCI Services  
225 Location Kessler Institute for Rehabilitation  
226 1199 Pleasant Valley Way  
227 West Orange, NJ 07052  
228 Phone 973-731-3900  
229 VA Email none  
230 nonVA email SKirshblum@KESSLER-REHAB.com  
231 Altern. email RBucci@KESSLER-REHAB.com (Dr. Kirshblum's Administrative Assistant)

232  
233 **Amanda Snodgrass, Clinical Research Pharmacist** **Cooperative Studies Program Clinical**  
234 **Research Pharmacy Coordinating**  
235 **Center (CSPCRPCC), Albuquerque,**  
236 **NM**

237 Name Amanda Snodgrass, PharmD  
238 Title CSP, Adverse Event Specialist  
239 Location VA Cooperative Studies Program, CSPCRPCC  
240 2401 Centre Ave  
241 Albuquerque, NM 87106  
242 Phone 505-248-3203 (office)  
243 505-206-8449 (cell)  
244 VA Email Amanda.snodgrass@va.gov  
245 nonVA email none  
246 Altern. email none

247 **EXECUTIVE SUMMARY/ABSTRACT**

248 Background Veterans with spinal cord injury (SCI) have many adverse secondary medical and  
249 quality of life (QOL) changes as a result of immobilization. Veterans with SCI who have  
250 completed rehabilitation after injury and are unable to ambulate receive a wheelchair as standard  
251 of care (SOC) for mobility. Powered exoskeletons are a technology that has recently become  
252 available as an alternate form of mobility by providing an external framework for support and  
253 computer controlled motorized hip and knee joints to assist with overground ambulation.

254 Research Questions (Objectives) Will Veterans with chronic SCI of  $\geq$ six months duration, who  
255 are medically stable and who use a wheelchair as SOC plus an exoskeletal-assisted walking (EAW)  
256 device in their home and community environments have clinically meaningful net improvements  
257 in mental health, bladder, bowel, and pain patient-reported outcomes compared with those who  
258 use only the SOC? Additionally, will the use of an EAW device for four months in the homes  
259 and/or communities of the participants result in a reduction of total body fat mass?

260 Study Design A two-group (Intervention and Control), randomized, clinical trial will be performed  
261 with a one-year feasibility component. The Intervention group will receive SOC plus EAW. The  
262 Control group will receive SOC only. The study will require seven years in total to complete and  
263 includes fifteen VA SCI Services as study sites. A feasibility phase will be employed using a  
264 staggered start by initially starting six sites, four sites starting one year later, and 5 other sites  
265 starting two years later. These initial six sites will be used to assess the start-up activities [hiring,  
266 training, equipment procurement, Central Institutional Review Board (CIRB) paperwork, etc.], the  
267 rate of recruitment, and any other issues that may be of value for the successful completion of the  
268 study. Lessons learned will be implemented for the remaining sites.

269 Relevance to VA In pilot studies conducted at the James J. Peters VA Medical Center, Bronx,  
270 NY, improvements in mental-emotional health, physical health and body composition were  
271 demonstrated by providing the participants the ability to walk for 4 to 6 hours per week over the  
272 course of three to five months. As of July 2014, a Class 2 designation was established by the  
273 Food and Drug Administration (FDA) for “powered exoskeletons”. To date, one device  
274 (ReWalk™) has received FDA Class 2 approval for institutional and home use and is currently  
275 available by prescription. The Department of Veterans Affairs (DVA) is the largest single provider  
276 to persons with SCI in the USA, caring for about 26,000 of the 42,000 estimated Veterans with  
277 SCI. The VA presently lacks the infrastructure to support Veterans with SCI to train to use this  
278 device in order to make this technology available for the home/community use. A controlled  
279 research study would be anticipated to be the optimal manner to demonstrate the efficacy, amount  
280 of use and safety of a powered exoskeleton in the home and community environments; findings  
281 would be immediately transferable to clinical care.

282 Number of Research Participants (Sample Size) One hundred-sixty participants (80/group) will be  
283 randomized. Each of the 15 study sites will be expected to pre-screen  $\geq$ 100 potential participants,  
284 screen  $\geq$ 60 participants, to reach the target of 160 randomized over 15 sites.

285 Participating Sites Fifteen SCI Services will be selected on the basis of potential recruitment  
286 numbers (N=13,606 total Veterans with SCI in the sites' catchment areas and N=7,022 followed  
287 annually at these sites) and geographic location, to permit an even distribution across the country.  
288 The fifteen sites include: Boston, Richmond, St. Louis, Tampa, Milwaukee, Minneapolis, Dallas,  
289 Houston, Palo Alto, Long Beach, Augusta, San Antonio, Bronx, Cleveland, and Albuquerque. Of  
290 these fifteen sites, five are VA Cooperative Studies Program (CSP) Network of Dedicated  
291 Enrollment Sites (NODES).

292 Duration of Participant Intake (Study Duration) The CS #2003 study duration is projected to be a  
293 total of seven years: The initial six sites will have a start-up year, followed by participant  
294 enrollment/data collection during years 1-4, and continued data collection/closeout during year 5,  
295 for a total of six years. The next four sites will begin the start-up year one year after the first six  
296 sites and follow the same enrollment, data collection and closeout schedule over the next five  
297 years. The next five sites will begin start-up one year after the four sites and follow the same  
298 enrollment, data collection and closeout schedule. All fifteen sites will be closed out after six years,  
299 and there is an additional year for the Coordinating Center and Chairperson's Office to complete  
300 data analysis and manuscript writing, thus the study total time is seven years. Participants in both  
301 groups will be asked to commit 33 weeks to this study. Participants in the Control arm will be  
302 offered an additional 8 weeks to receive EAW training in the medical centers, without outcome  
303 data being collected.

304 Treatment (follow-up) The intervention being tested is four months of home and/or community  
305 use of a powered exoskeleton.

306 Definition of Participant Samples (Study Population) One-hundred sixty male or female Veterans  
307 or military members with chronic SCI,  $\geq$ six months duration,  $\geq$ 18 years of age, functional use of  
308 their hands, medically stable, and wheelchair users for indoor and outdoor mobility, will be eligible  
309 for screening. All potential participants will be Veterans or military members with SCI. Study  
310 participants will generally be outpatients with the exception of those inpatients who meet the  
311 eligibility criteria, and who are approved by the Site Investigator (e.g., some inpatients may have  
312 been admitted for a wheelchair fitting or another non-medical reason). Non-veterans with SCI will  
313 not be eligible.

314 Treatment Arms All participants will receive four months of treatment, randomized into two arms:  
315 SOC plus EAW or SOC only.

316 Endpoints Primary outcome one will be the Mental Component Summary of the Veterans Rand-  
317 36 (MCS/VR-36). Primary outcome two will be the sum T-score of the SCI-QOL bladder  
318 management difficulties, bowel management difficulties and pain interference item banks. The  
319 major secondary outcome will be total body fat mass. The two primary and the major secondary  
320 outcomes will be analyzed as the proportion of participants in each group who achieved a clinically  
321 meaningful change in score. The endpoint will be success or failure for these outcomes.

322 **Protocol amendment due to COVID-19 pandemic:** In Fiscal Year 2020 (FY20), Quarter 2, the  
323 United States (US) experienced a coronavirus pandemic. As a result, beginning in March of 2020,  
324 most of the country was placed on social distancing restrictions and/or quarantine. CSP #2003 was  
325 placed on a voluntary administrative hold on March 16, 2020. During this pandemic, the Chair's  
326 Office became aware of potential loss of services for our Veterans with SCI such as caregivers,  
327 medical appointments, wheelchair repair and others, and has proposed an amendment to CSP  
328 #2003. This amendment is to conduct an SCI-specific survey to determine the effect of the  
329 pandemic on Veterans with SCI who have been previously screened for participation in this study.  
330 A follow-up survey and blood testing for the virus antibodies will also be conducted at least 1  
331 month after the initial survey. The administrative hold has been lifted for the COVID-19 survey  
332 and blood draw.

333 **I. INTRODUCTION AND BACKGROUND**

334  
335 Veterans with spinal cord injury (SCI) have an overabundance of adverse secondary medical and  
336 quality of life (QOL) changes as a result of paralysis and immobilization. Veterans with SCI who  
337 have completed rehabilitation after injury and are unable to ambulate receive a wheelchair as  
338 standard of care (SOC) for mobility. Powered exoskeletons are a technology that has recently  
339 become available as an alternate form of mobility by providing an external framework for support  
340 and computer controlled motorized hip and knee joints to assist with overground  
341 ambulation. These exoskeletal devices have been used primarily in a hospital setting but have  
342 been approved for home/community use since 2014. Identifying efficacy and safety of a powered  
343 exoskeleton to be used in the home or community environment for Veterans with SCI is an  
344 important issue.

345  
346 Physical, medical, and health-related quality of life changes following SCI: SCI results in  
347 paralysis and near permanent loss of voluntary function below the level of lesion. Those with more  
348 severe neurological lesions lose the ability to perform the weight bearing activities of standing and  
349 walking. Most become wheelchair users for indoor and outdoor mobility. The loss of the ability  
350 to walk is an obvious consequence of SCI. However, there are many less observable complications  
351 that result from loss of walking activity that serve to reduce quality of life (QOL), such as  
352 compromised bowel and bladder function, increased pain, extreme changes in body composition,  
353 and difficulty sleeping. On a daily basis, coping with loss of bowel [1-3] and bladder [4, 5]  
354 function, chronic pain [6], and difficulty sleeping [7] takes a tremendous, and often unrecognized,  
355 toll on emotional and physical well-being. Chronic constipation [8] and difficulty with evacuation  
356 are time consuming, taking hours per week, requiring prescription of multiple types of stool  
357 softeners and laxatives, and often the use of enemas and/or digital stimulation to perform a bowel  
358 evacuation, all of which are over-shadowed by the ever-present anxiety of a potential bowel  
359 accident [1, 9]. Standing alone has not been demonstrated to be effective in decreasing time to  
360 first stool for a bowel evacuation [10]. Constant sitting often leads to chronic back pain and, in  
361 those with some sensation below their lesion, leg pain is also prevalent [11]. Uncontrolled muscle  
362 spasms, which are similar to leg cramps in those who are not paralyzed, also cause discomfort and  
363 pain and may be severe at times [12]. Sleep is unremittingly interrupted due to spasms, pain and  
364 other conditions directly related to paralysis [7, 13, 14]. Immobilization from SCI has severe  
365 consequences on body composition [15-18]. Within the first two years after SCI, persons with  
366 motor-complete lesions may be expected to gain as much as 10 kg of total body fat mass and to  
367 lose a similar amount of lean tissue mass (Spungen, et.al., manuscript under review). With these

368 extreme changes in body composition and the forced reduction in levels of activity, there are  
369 associated carbohydrate and lipid metabolism abnormalities [19-21]. Impaired glucose tolerance  
370 or diabetes mellitus occurs in as many as 60% of the SCI population [21-24]. HDL-c levels below  
371 35 mg/dL (an independent risk factor for heart disease) are reported in 24 to 40% of persons with  
372 SCI [25, 26].

373 Ambulation efforts for persons with SCI: Clinical therapeutic options available to assist persons  
374 with SCI to stand and walk have been, by and large, unsuccessful when extended to the home  
375 environment. For people with motor-complete SCI who have good upper body strength, or those  
376 with motor-incomplete SCI, such as those who have some voluntary movement in the legs or can  
377 even weight bear to some degree, various types of gait orthoses have had limited success in  
378 allowing the individual to stand and walk [27-29]. The high energy cost of using gait orthoses,  
379 though, limits use to those with sufficient upper body strength to ambulate for short bouts, and  
380 extended walking does not occur with the use of gait orthoses [27, 30]. Locomotor training, with  
381 either manual assistance by two therapists or robotic assistance with a Lokomat to move the legs  
382 and feet in a walking motion over a treadmill while the patient is suspended in an overhead harness  
383 to off-load body weight, has demonstrated positive benefits on cardiovascular function, self-  
384 esteem, and quality of life [31-35]. These body-weight supported treadmill training methods  
385 require significant staff commitment, equipment and space, and these approaches are not practical  
386 for home, work or community use; thus, these benefits are lost with the discontinuation of the gait  
387 training program. Ambulation has also been accomplished with functional electrical stimulation  
388 (FES), but these FES systems have the challenge of controlling the joint movements appropriate  
389 for gait and because FES is an anaerobic form of exercise, the users invariably experience rapid  
390 muscle fatigue [36]. To reduce the challenge of controlling joint movement, hybrid systems have  
391 combined FES and a passive orthotic [37, 38], and have demonstrated improvements in energy  
392 expended while walking, but the challenge of rapid muscle fatigue still persists. Several other  
393 types of hybrid systems, such as stored-energy hybrid systems which use FES to stimulate the  
394 muscle group for rotation of one joint and transfer energy to drive another joint, or controlled brake  
395 orthoses which use FES to power the movement but incorporate a computer controlled brake  
396 system to lock out the joint and control joint speeds during ambulation, have been or are being  
397 developed, but these approaches are still confined to the research setting [39-42]. As such, most  
398 of these devices for assisted FES walking have remained as concepts or prototypes and have not  
399 been commercialized, making viable options for walking outside the hospital or rehabilitation  
400 setting relatively limited.  
401



402 Use of a wheelchair for mobility and daily activities remains the standard of care for Veterans who  
403 are unable to stand and walk as a result of paralysis due to SCI. When a person becomes injured,  
404 initial rehabilitation is prescribed for usually no longer than four to six months, depending on the  
405 severity of the SCI. Once discharged, there are very few rehabilitation programs or strategies for  
406 the home or as an outpatient that are being offered to Veterans with chronic SCI. As such, our  
407 Veterans with chronic SCI remain wheelchair-bound and are part of a demographic that is one of  
408 the most sedentary known to man, with resultant numerous secondary medical consequences of  
409 longstanding, severe immobilization.

410  
411 Exoskeletal-assisted walking (EAW) in SCI: Since 2011, a relatively new technology, that permits  
412 assisted standing and walking overground, has been available for people with immobilization due  
413 to paralysis from SCI. This robot-like exoskeletal technology uses a computerized, powered  
414 exoskeleton support frame, attached to the pelvis and legs, that allows a person with paralysis to  
415 stand and walk [43, 44]. Early in 2011, Dr. Ann M. Spungen and her team at the VA Rehabilitation  
416 Research & Development (RR&D) National Center of Excellence for the Medical Consequences  
417 of Spinal Cord Injury, James J. Peters VA Medical Center (JJPVAMC), Bronx, NY, began  
418 conducting pilot studies in the safety and efficacy of exoskeletal-assisted walking in persons with  
419 SCI. They were the first Veterans Affairs (VA) investigators to acquire exoskeletal-assisted  
420 walking (EAW) technology to test the safety and efficacy and for use in persons with SCI [45-47].  
421 This powered exoskeleton (ReWalk™) [48] allows a person with paraplegia to stand and walk  
422 overground for extended periods of time.

423 One distinct advantage of the powered exoskeleton over previous rehabilitation walking modalities  
424 is that it has the potential to be prescribed for use in the home and community. The exoskeletal  
425 technology has the potential to change the field of rehabilitation medicine by offering a modality  
426 that permits assisted walking not only in the rehabilitation setting, but also in the home and  
427 community environment. This opens the possibility for continuous use and an option for  
428 increasing upright physical activity throughout life. To date, several DVA SCI Services have  
429 tentatively embarked on using this technology in the clinical institutional setting.

430  
431 The investigators at JJPVAMC have been studying the efficacy of using this device in persons  
432 with SCI on mobility and walking skills, quality of life, medical, and health-related outcomes.  
433 These investigators have demonstrated that people with SCI who are otherwise wheelchair-  
434 dependent are able to tolerate performing EAW for four to six hours per week without difficulty,  
435 and they report improvements in QOL outcomes after approximately two to four months of  
436 exoskeletal training. Specific benefits have been documented in body composition [49], energy  
437 expenditure [50], bowel function, sleep, and pain reduction (See Preliminary data). The reported  
438 benefits from increased activity through upright mobility are not unexpected. It has long been  
439 appreciated that increasing activity and exercise in a sedentary person has numerous health  
440 benefits. It is relevant to note that, to date, the exoskeletal-assisted walking participants with SCI  
441 at the JJPVAMC have unanimously reported that being able to walk again has markedly changed  
442 their perceptions of their lives for the better, and this beneficial appraisal of participants is even  
443 with the use of this device being highly restricted to use in the institutional setting. It remains  
444 incredibly disheartening for these participants to complete the research program and no longer  
445 have a viable option for performing overground walking, but this would be a viable option if  
446 prescribed for home use. The proposed VA Cooperative Study (CS #2003) would demonstrate  
447 the physical, mental, social, and emotional benefits of use of these robotic ambulatory devices in  
448 the home and community environments and, thus, have the potential to dramatically change the  
449 lives of our Veterans with SCI.

450  
451 Of note, the ReWalk is not the only exoskeleton commercially available [51, 52], or with the  
452 potential to be commercially available [53], but this specific device is currently the only one with  
453 Food and Drug Administration (FDA) approval as a Class 2 device for rehabilitation and home  
454 use [54]. Findings from the proposed study would be readily transferable to any future powered  
455 exoskeleton devices that may become available from development from VA, academic, or the  
456 private sectors.

457 **A. Measurement of Quality of Life Outcomes in SCI**

458  
459 The Patient Reported Outcomes Measurement Information System (PROMIS) and the link to the  
460 SCI-QOL: The National Institutes of Health (NIH) Roadmap for Medical Research in the 21st  
461 Century (now called the Common Fund) has supported major initiatives in biomedical research  
462 that no single institute could accomplish alone. One key Common Fund project was a multicenter  
463 cooperative group award to develop and validate a Patient-Reported Outcomes Measurement  
464 Information System (PROMIS U01 AR052177-02). PROMIS contributes to NIH re-engineering  
465 by building and validating common, accessible item banks to measure key symptoms and health  
466 concepts applicable to a range of chronic conditions. At the same time, the National Institute of  
467 Neurological Disorders and Stroke (NINDS) issued a request for proposals to construct a clinically  
468 relevant and useful health-related quality of life (HRQOL) measurement tool for major  
469 neurological diseases that affect the United States population. This measurement tool was  
470 developed to be consistent across the selected conditions to allow for cross-disease comparison,  
471 and yet flexible enough to capture condition-specific HRQOL issues. This contract was awarded  
472 to the same group that was developing PROMIS (Dr. David Cella and colleagues) and is called  
473 Neuro-QOL. The Neuro-QOL was a five year effort to construct a psychometrically-sound and  
474 clinically-relevant HRQOL measurement system for individuals with major neurological disorders  
475 [55]. Wherever possible, Neuro-QOL measures included relevant PROMIS items to allow for  
476 linking and cross-walking of scores between the two systems. This is valuable because a multiple  
477 sclerosis investigator who uses a PROMIS measure could also derive a Neuro-QOL score and  
478 compare results in his/her study to other multiple sclerosis studies that have used Neuro-QOL [56].  
479 Early in the award period, a rigorous process was undertaken by investigators and outside experts  
480 to select 5 adult and 2 pediatric conditions (the budget would only allow this many) to represent  
481 the major issues and concerns faced by individuals with neurological disorders. After conducting  
482 interviews with 44 neurology professionals, an online survey with 89 members of the American  
483 Academy of Neurology and a day-long consensus meeting with an international panel of  
484 distinguished experts spanning the field of neurology, the following conditions were selected:  
485 stroke, multiple sclerosis, amyotrophic lateral sclerosis, Parkinson's disease, epilepsy [adult and  
486 child], and muscular dystrophy. Even though there was considerable interest throughout this  
487 process to include SCI among the selected adult conditions, in the end, it was not included [57].  
488 Nonetheless, it became clear that extending Neuro-QOL measurement development  
489 methodologies to SCI could significantly improve this field's ability to assess important HRQOL  
490 outcomes and track clinical treatment changes. In 2008, working closely with members of the  
491 Neuro-QOL team, Dr. David Tulsky was awarded funding from two agencies of the NIH: NINDS

492 and the National Center for Medical Rehabilitation Research (NCMRR) to develop SCI-specific  
 493 patient reported outcome measurement tools in physical-medical, emotional and social function  
 494 (SCI-QOL) (NIH #5RO1HD054659). Additionally, the National Institute of Disability  
 495 Rehabilitation Research (NIDRR) separately funded Drs. Tulsy and Alan Jette (from Boston  
 496 University, Boston, MA) to develop a physical function index of HRQOL instruments for SCI  
 497 (SCI-FI) (NIH #5RO1HD054659). The goal and a major strength of the SCI-QOL and SCI-FI  
 498 projects were to embed Neuro-QOL items (which include verbatim PROMIS items) at the core of  
 499 the new targeted SCI-specific item banks. The SCI-QOL utilized the PROMIS standards [58] for  
 500 instrument development, incorporating both qualitative (i.e., focus groups, cognitive debriefing  
 501 interviews) and quantitative (i.e., item response theory analyses and computerized adaptive  
 502 testing) [59] methods to ensure that the final SCI-QOL was psychometrically sound while at the  
 503 same time conceptually grounded to issues that are truly important to individuals with SCI [60,  
 504 61]. The final SCI-QOL includes 22 item response theory calibrated item banks/scales across the  
 505 domains of Physical-Medical Health, Physical Functioning (SCI-FI), Social Participation, and  
 506 Emotional Health. Notably, item banks that are based on PROMIS (e.g., Depression, Anxiety) or  
 507 Neuro-QOL (e.g., Stigma, Ability to Participate in Social Roles and Activities) banks/items, the  
 508 SCI-QOL scores have undergone a linear transformation back to the PROMIS or Neuro-QOL  
 509 metric, respectively. In this way, SCI-QOL item banks are optimized for individuals with SCI (i.e.,  
 510 through selection and order of items administered) yet are directly comparable to individuals in  
 511 the general population through this statistical transformation.

512 The NIH/NIDRR funded initiatives have supported the creation of innovative health-related QOL  
 513 measurement approaches, specific for individuals with SCI. Two valid and useful SCI-specific,  
 514

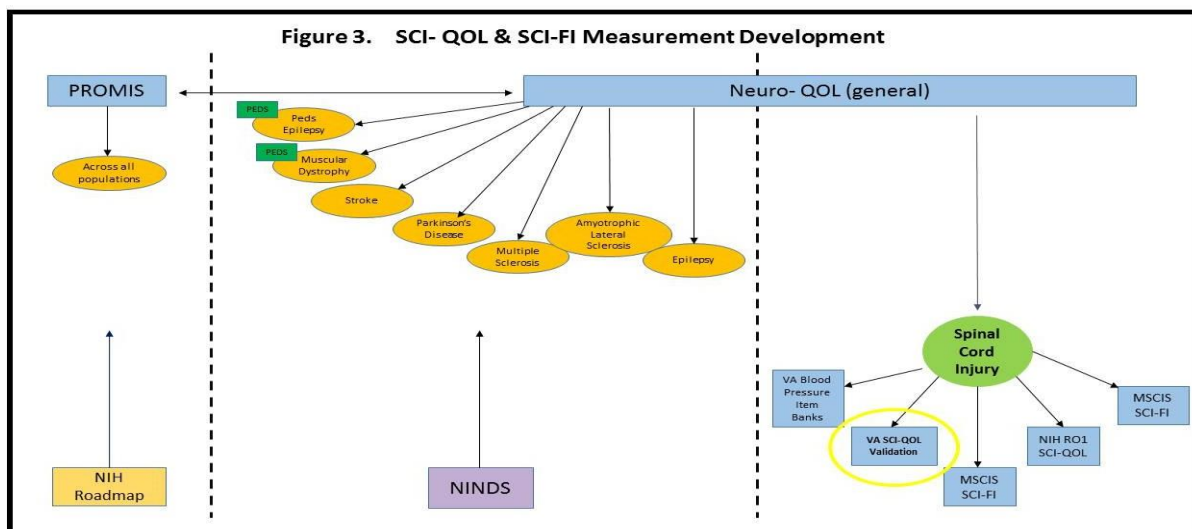

515 HRQOL measurement tools now enhance the efforts of clinicians and researchers who are

516 investigating interventions for improved function and quality of life in persons with SCI [59, 62-  
517 68]. In 2011, Dr. Spungen received VA RR&D, Merit Review funding (#B7566-R) to add  
518 Veterans with SCI to the SCI-QOL database. This VA Merit Review study is in its last year of  
519 data collection. A graphic depiction of the PROMIS, Neuro-QOL and SCI-QOL is provided  
520 (Figure 3).

521  
522 Psychometric Properties of the SCI-QOL/SCI-FI: Each of the final SCI-QOL/SCI-FI item banks  
523 is a unidimensional set of items (determined by confirmatory factor analysis) that have been  
524 calibrated with item response theory (IRT). The stability of the IRT calibrations provides  
525 preliminary evidence of the SCI-QOL's validity [60]. Furthermore, all SCI-QOL banks  
526 demonstrate internal consistency (Cronbach's alpha) and 2-week test-retest reliability. Finally, the  
527 SCI-FI (physical functioning) banks have demonstrated responsiveness to the naturally occurring  
528 change following SCI at both 6 month and 1 year time points.

529  
530 The PROMIS Sleep Disturbance outcome measure was validated and calibrated using classic  
531 validation techniques and IRT in more than 2,200 adults from an internet pooling sample and  
532 medical, psychiatric and sleep clinics [69, 70]. Moderate to high correlations were demonstrated  
533 between existing sleep scales and by statistically significant differences found between patients  
534 with known sleep disorders and those without any [69]. The PROMIS Sleep Disturbance outcome  
535 measurement was found to be sufficient because no unique questions that required SCI-specific  
536 content were thought to be needed [66]. The PROMIS Sleep disturbance outcome measure is a  
537 useful tool as is.

538  
539 A clinically significant difference of the patient-reported outcomes for the QOL measurement  
540 determined from any of the PROMIS, Neuro-QOL, SCI-QOL, or SCI-FI assessment tools has been  
541 undergoing evaluation. In the interim, three prominent investigators in this field joined forces to  
542 determine a consensus of a clinically relevant change for any of these patient-reported outcome  
543 questionnaires [71]. These investigators support a ½ standard deviation (SD) as a conservative  
544 estimate for a clinically meaningful change. A minimally important difference (MID) is expected  
545 to be below a ½ SD. They report that, in lieu of a specifically tested effort to determine the MID  
546 in a specific population (such as SCI), use of the ½ SD is a strong and conservative approach [71].

547  
548 In addition to a scientific rationale (please refer to the pilot data), there are ethical and financial  
549 considerations that support the justification for the VA to fund this initiative. It has been long  
550 recognized that a sedentary lifestyle is deleterious for one's health, self-esteem and well-being.

551 The earliest survivors of an amputation had at least a wooden peg to assist them with ambulation.  
552 Fortunately, prosthetic limb technology has improved such that lower limb prostheses are  
553 sophisticated, computerized devices that permit an eligible amputee to walk, run, jump, climb  
554 stairs, swim, and perform almost all functions of ambulation and lifestyle activities that they were  
555 able to do prior to limb loss. The problem of restoring ambulation to someone with paralysis from  
556 SCI has been far more challenging. However, technology has finally advanced sufficiently to  
557 address the problem, and although not on par with the prosthetic limbs yet, exoskeletons offer an  
558 upright ambulatory solution for persons who are paralyzed and potentially other wheelchair users  
559 for mobility. The exoskeletal-assisted walking technology represents a paradigm shift for Veterans  
560 with chronic SCI who only have had the option of the wheelchair for “ambulation” as standard  
561 care. This new paradigm for mobility and rehabilitation for our Veterans with chronic SCI has the  
562 obvious and distinct potential to improve their quality of life. In the absence of a medical  
563 contraindication, rehabilitation clinicians would never consider the option of not prescribing a  
564 lower limb prosthetic to an eligible amputee. Should not a similar decision-making process be  
565 applied to our eligible Veterans with SCI?

566  
567 The DVA has 26 SCI Services that annually care for about approximately 26,000 of the estimated  
568 42,000 eligible Veterans with SCI (VA Fact Sheet, 2009). What if only 1,000 of these Veterans  
569 with SCI are eligible and interested in being prescribed an exoskeleton for home/community use?  
570 The cost of purchasing 1,000 ReWalk exoskeletal units for Veterans with SCI would be about \$78  
571 million dollars, not including the clinical staff needed for training and monitoring the use of this  
572 device. However, if 10,000 Veterans with SCI wanted and were eligible for one of these devices,  
573 then including the support services, this would be approaching a billion dollar item for the DVA.  
574 Is it not prudent to study this device in the home/community environment to determine its safety  
575 and efficacy prior to being pressured to embark on this path by Veteran, public, or Congressional  
576 influence? Further developments in exoskeletal technology and new products are inevitable. Of  
577 note, however, the current state-of-the-art exoskeletal technology is not expected to change in the  
578 time-frame of this proposed study. In addition, this study is uniquely designed as a template that  
579 would support any new exoskeletal developments. It would benefit the VA to have a system in  
580 place for the assessment of this particular robotic device because the ReWalk is the first and only  
581 such device to date to receive FDA Class 2 approval for institutional and home/community use.  
582 Such an initiative could then provide the structure and generate the necessary experience to  
583 evaluate future exoskeletal technologies.

584  
585 Because the ReWalk exoskeleton is a radical and exciting departure from the traditional

586 rehabilitation approaches, by permitting those with SCI to stand and walk overground, there has  
587 already been a fair amount of media and publicity on the exoskeletal-assisted walking technology.  
588 This technology is already highly visible in the public eye. The VA would be making a clear and  
589 unequivocal statement of its intent to improve the lives of Veterans with SCI by testing the efficacy  
590 of this device in the home and community environments.

591  
592 **B. Pilot Data**

593  
594 To date, 19 participants with SCI who were wheelchair users for indoor and outdoor mobility were  
595 consented and screened for eligibility. Seven of the 19 participants were screening failures (two  
596 for low bone mineral density (BMD), one for medical issues, and four for scheduling conflicts)  
597 and 12 completed 15 or more EAW sessions. Pre- and post-walking data were collected in all 12  
598 participants. One of 12 participants was lost to follow-up for the QOL data after 15 sessions (the  
599 participant had been wait-listed for medical school and was suddenly accepted, necessitating  
600 abrupt withdrawal from the study); as such, walking data are reported on participants (Table 1).  
601 QOL data are reported on 11 participants (below in the section for the Primary Outcome 2). The  
602 participant that was lost to follow-up for the QOL data was treated as study failure and was  
603 included as such for the power calculations. Of the 12 participants who were trained in the  
604 exoskeletal device, compliance with attendance to the sessions was >90%. If a session was missed,  
605 make-up sessions were easily scheduled, often at the request of the participant. The demographic  
606 data is reported in 12 participants with durations of injury ranging from 1 to 19 years (Table 1).  
607 The best walking tests achieved with the level of assistance (LOA) needed for this activity are also  
608 reported (Table 1.)

**Table 1. Characteristics of the Participants and Walk Test Results**

| Demographic Characteristics |         |         |         |        |         |       |        | Walk Tests (WT) and Levels of Assistance (LOA) |       |          |       |       |
|-----------------------------|---------|---------|---------|--------|---------|-------|--------|------------------------------------------------|-------|----------|-------|-------|
| SID                         | Age (y) | Ht (cm) | Wt (kg) | Gender | DOI (y) | LOI   | AIS    | 10 m WT                                        |       | 6-min WT |       |       |
|                             |         |         |         |        |         |       |        | (s)                                            | (m/s) | (m)      | (m/s) | (LOA) |
| 1                           | 34      | 173     | 66.7    | Male   | 9       | T4    | B      | 39                                             | 0.256 | 90.2     | 0.251 | Min   |
| 2                           | 48      | 168     | 68      | Male   | 4       | T10   | A      | 62                                             | 0.161 | 50.5     | 0.14  | Min   |
| 3                           | 44      | 183     | 77.1    | Male   | 4.5     | T4    | A      | 20                                             | 0.58  | 209.0    | 0.581 | MI    |
| 4                           | 58      | 160     | 64.4    | Female | 1.5     | C8/T8 | A (NT) | 24                                             | 0.417 | 139.0    | 0.386 | MI    |
| 5                           | 61      | 175     | 72.6    | Male   | 14      | T11   | A      | 23                                             | 0.435 | 137.4    | 0.382 | MI    |
| 6                           | 24      | 185     | 74.8    | Male   | 5       | T5    | A      | 56                                             | 0.179 | 60.2     | 0.167 | Min   |
| 7                           | 40      | 183     | 88.5    | Male   | 1.5     | T1    | B      | 61                                             | 0.164 | 50.8     | 0.141 | S     |
| 8                           | 56      | 175     | 83.9    | Male   | 3       | T9    | A      | 22                                             | 0.459 | 151.0    | 0.419 | S     |
| 9                           | 50      | 183     | 99.8    | Male   | 11      | T7    | A      | 17                                             | 0.585 | 208.2    | 0.578 | MI    |
| 10                          | 37      | 170     | 65.8    | Male   | 6       | T2    | A      | 22                                             | 0.459 | 150.0    | 0.417 | Min   |
| 11                          | 64      | 173     | 72.8    | Male   | 3       | T2    | A      | 78                                             | 0.128 | 46.3     | 0.129 | Mod   |
| 12                          | 37      | 152     | 65.8    | Female | 19      | C8    | C (NT) | 14                                             | 0.714 | 255.9    | 0.711 | MI    |

Table 1. SID=subject identification number; y=years; cm=centimeters; kg=kilograms; DOI=duration of injury; LOI=level of injury; AIS=American Spinal Injury International Standards Scale; LOA=level of assistance; s=seconds; m=meters; and NT=non-traumatic SCI. LOA was adapted from the FIM as one of the following: moderate assistance (Mod) – participant performs 50% to 74% of the task and the trainer has both hands on the participant or device at all times to provide occasional guidance or balance support; minimal assistance (Min) – the user performs 75% or more of the task and the trainer has one hand on the participant or device for infrequent guidance or balance support; supervision (S) – the trainer is not touching the participant but is close enough to reach in to provide support for balance or guidance as needed; and modified independence (MI) – the trainer does not provide any assistance, and the participant is fully independent while walking in device. Nineteen participants were consented for screening eligibility. Seven participants (SID#'s 2, 3, 4, 8, 12, 13, and 17) were screening failures: two for low BMD, one medical illness, and four for schedule conflicts.

609 Heart rate (HR) and blood pressure (BP): HR and BP responses were measured during each  
610 session in the resting seated position prior to standing and walking, immediately after walking  
611 while still standing and then again when seated, after the walking session. The results at 18±5 and  
612 32±18 sessions are reported (Table 2). The vital sign responses during sitting and post walking  
613 were in the expected ranges, demonstrating an increase in HR from seated to walking. In the  
614 participants studied, there were no orthostatic hypotensive episodes with the postural changes from  
615 sitting to standing in the device.



616 Rating of perceived exertion (RPE): RPE is a self-reported indicator of how hard the person  
 617 perceives that they are performing an activity. RPE correlates well with HR when a 0 is added to  
 618 the rating value (for example, a RPE of 6 is equivalent to a HR of 60 bpm, a typical resting value;  
 619 and a RPE of 20 is related to a maximal effort of a HR of 200 bpm [72, 73]. As the participants  
 620 trained, more actual walking occurred during each session, yet their perception of exertion during  
 621 walking was reduced (Table 2).  
 622

| <b>Table 2. Group Average Heart Rate, Blood Pressure and Rating of Perceived Exertion Responses to Exoskeletal-Assisted Walking across Sessions</b> |                     |                         |                     |                   |                     |                   |                     |
|-----------------------------------------------------------------------------------------------------------------------------------------------------|---------------------|-------------------------|---------------------|-------------------|---------------------|-------------------|---------------------|
| <b>Sessions</b>                                                                                                                                     | <b>RPE</b>          | <b>Heart Rate (bpm)</b> |                     | <b>SBP (mmHg)</b> |                     | <b>DBP (mmHg)</b> |                     |
|                                                                                                                                                     | Standing (post EAW) | Seated (pre EAW)        | Standing (post EAW) | Seated (pre EAW)  | Standing (post EAW) | Seated (pre EAW)  | Standing (post EAW) |
| 1 to 10                                                                                                                                             | 14±2                | 79±13                   | 102±22              | 127±12            | 130±14              | 72±8              | 73±10               |
| 11 to 25                                                                                                                                            | 12±3                | 80±9                    | 112±22              | 123±15            | 122±20              | 73±13             | 68±20               |
| 26 to 40                                                                                                                                            | 10±3                | 75±11                   | 113±17              | 122±19            | 123±17              | 68±9              | 70±8                |
| > 40                                                                                                                                                | 8±2                 | 79±13                   | 114±25              | 128±13            | 127±17              | 72±9              | 72±2                |

Table 2. SBP=Systolic blood pressure; DBP=Diastolic blood pressure; mmHg=millimeters of mercury; EAW=exoskeletal-assisted walking

623  
 624 **C. Preliminary Data Employed for the Primary Outcome Variables**

625  
 626 Primary Outcome 1 (supporting data): A commonly used measure of physical and mental patient-  
 627 reported health outcomes is the SF-36 [74]. The SF-36 has been reported in persons with SCI of  
 628 less than 6 months post injury [75] and in those who were less than four years post injury [76]. In  
 629 the Veterans Health Administration, the Veterans Rand 36 (VR-36) has been used to document  
 630 health-related QOL outcomes in Veterans [77-79]. The SF-36 was administered to participants  
 631 before (N=12) and after (N=11, one lost to follow-up) EAW training. Using the MCS scores to  
 632 calculate a mean difference and 95% CI for the upper and lower limits for the pre- and post- values,  
 633 the average value for a net change demonstrated clinically significant improvement of 9.03 ±  
 634 17.02, CI -2.4 to 20.5, p=0.1087 (Figure 4). **Four of 12 participants demonstrated a clinically**  
 635 **relevant change of ≥4.0 on the MCS of the SF-36.** This proportion was used to calculate the  
 636 power and sample size for the Primary Outcome 1 (MCS/VR-36) that is reported in the statistical  
 637 section of the proposal. [Note, the MCS SF-36 was used for the preliminary study, but the  
 638 MCS/VR-36 will be used in this study as the Primary Outcome 1.] In support of the average  
 639 improvement in the MCS scores, comparisons were made with those of other studies where the  
 640 SF-36 was administered to persons with SCI within 6 months of injury [75] and then in another  
 641 group who were less than four years since injury [76]. The MCS average scores for the pre- and

642 post- ReWalk participants were compared to data from both studies. Lucke, et.al., who  
 643 administered the SF-36 to persons with SCI of only 6 months duration [75] and Westgren et.al.

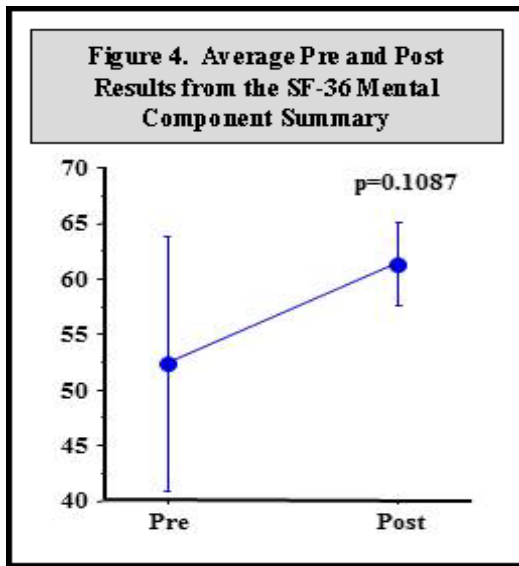

644 who administered the SF-36 in those with SCI of <4  
 645 years duration [76] (Figure 5). Both of these studies  
 646 reported MCS scores of 51.8 and 51.9 respectively;  
 647 the MCS scores from these prior reports are  
 648 consistent with the findings of our 11 participants at  
 649 baseline (MCS of 52.3). After EAW, the ReWalk  
 650 participants increased to 61.5 (Figure 5).

651 Primary Outcome 2 (supporting data): Three item  
 652 banks from the SCI-QOL Physical-Medical Health  
 653 domain were used to assess pre- and post- changes  
 654 after 40±15 sessions of exoskeletal-assisted walking  
 655 in 11 participants (one of the 12 was lost to follow-  
 656 up for the QOL assessments). These item banks consisted of patient-reported outcomes for bladder

657 management difficulties, bowel management difficulties, and pain interference. The group means for the pre-and post-  
 658 values with the 95% CI are presented (Figure 6).

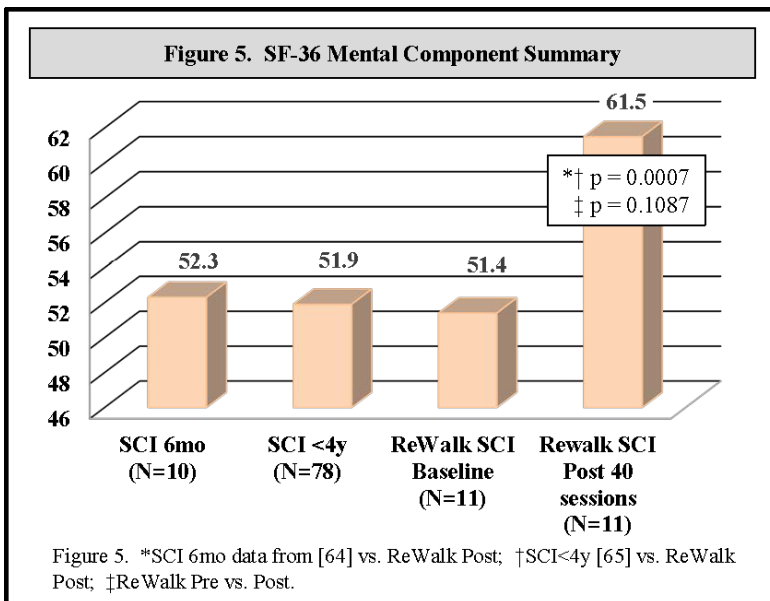

660 Figure 5. \*†SCI 6mo data from [64] vs. ReWalk Post; ‡SCI<4y [65] vs. ReWalk  
 661 Post; †ReWalk Pre vs. Post.

662 management difficulties, bowel management difficulties, and  
 663 pain interference. The group means for the pre-and post-  
 664 values with the 95% CI are presented (Figure 6).

665 Participants reported significant improvement (indicated as a  
 666 reduction in scores) in the bladder (Figure 6A) and bowel  
 667 (Figure 6B) item banks. Pain Interference also improved but  
 668 failed to reach statistical significance (Figure 6C). In

671 support of the SCI-QOL net pain improvements, analysis of the Physical Pain and Pain interference  
 672 components from the SF-36 demonstrated significant net improvements from 50±24 to 76±12,  
 673 p=0.0253. Using a simple sum score of the three SCI-QOL item banks (bladder, bowel and pain)  
 674 from the Physical-Medical Health (PMH) domain, the mean difference from pre- to post-EAW  
 675 training was -27.1±34.3; 95% CI: -50.1 to -4.0, p=0.0257. **Five of the 12 participants**  
 676

677 **demonstrated a clinically relevant improvement of at least 10% in the sum score of the three**  
678 **item banks.** This proportion, 42% responders, was used to calculate the power and sample size  
679 for the Primary Outcome 2 (PMH/SCI-QOL) that is reported in the Statistical Analysis Plan  
680 (Section XIII) of the protocol.

681  
682

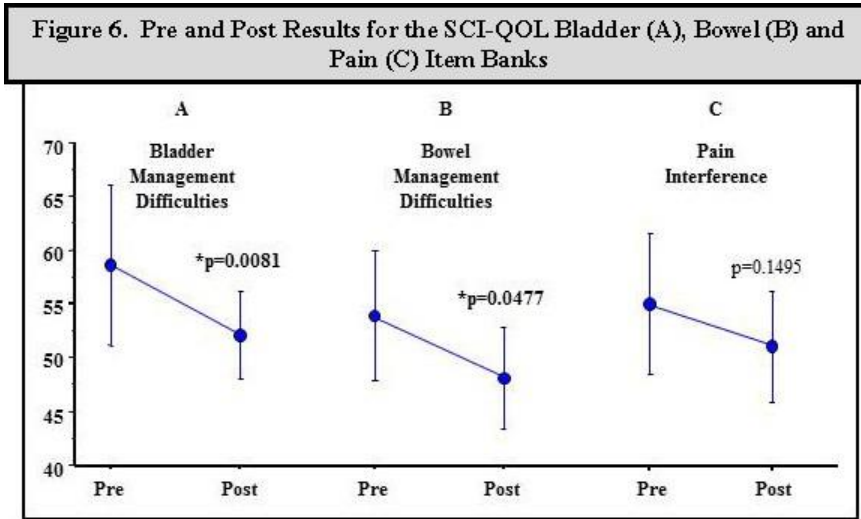

683  
684

#### D. Supporting Data for the Major Secondary Outcome Variable

685

686 Body composition for fat and lean tissue mass was measured by the soft tissue components of a  
687 dual energy x-absorptiometry (DXA) scanner in the 12 participants of the pilot study. Six of 12  
688 participants lost more than 1.0 kg of total body fat ( $-2.54 \pm 0.88$  kg). Two lost less than 1.0 kg and  
689 2 gained more than 3.0 kg of total body fat. One participant was lost to follow-up. The loss of  $\geq 1.0$   
690 kg of total body fat mass in one half of the participants is a remarkable finding because few efforts  
691 at an intervention (i.e. physical activity or dietary) have been successful in reducing fat mass in  
692 this population (Table 3). **Six of 12 participants achieved a meaningful reduction in total body**  
693 **fat mass ( $\geq 1.0$  kg loss). It is anticipated that during the four-month home use phase, 35% of**  
694 **the Intervention group will maintain a  $\geq 1.0$  kg fat loss from baseline. This proportion (35%)**  
695 **was used to calculate the power for the major secondary outcome.**

696  
697  
698  
699  
700  
701  
702  
703  
704  
705  
706  
707  
708  
709  
710  
711  
712  
713  
714  
715  
716  
717  
718  
719

**Table 3. Preliminary Data for Total Body Fat (kg)**  
(For the Major Secondary Outcome)

| S's               | Pre (kg) | Post (kg) | Diff (kg) | ≥1.0 kg loss |
|-------------------|----------|-----------|-----------|--------------|
| 1                 | 9.71     | 6.98      | -2.73     | yes          |
| 2                 | 15.43    | 14.13     | -1.30     | yes          |
| 3                 | 31.77    | 30.78     | -0.99     | no           |
| 4                 | 24.22    | 21.77     | -2.45     | yes          |
| 5                 | 25.84    | 25.06     | -0.78     | no           |
| 6*                | 16.15    |           |           | no           |
| 7                 | 29.35    | 26.21     | -3.14     | yes          |
| 8                 | 32.98    | 29.23     | -3.74     | yes          |
| 9                 | 31.75    | 29.89     | -1.87     | yes          |
| 10                | 16.20    | 15.82     | -0.38     | no           |
| 11                | 21.29    | 24.76     | 3.47      | no           |
| 12                | 34.88    | 38.50     | 3.62      | no           |
| <b>Responders</b> |          |           |           | <b>6</b>     |

\* Subject 6 was loss to follow-up, but was treated as a study failure in the preliminary data.

**E. Secondary Outcomes**

The PROMIS Sleep Disturbance outcome measure was used to assess change in sleep disturbance. Additional measurements of sleep and fatigue problems were assessed using the Epworth Sleepiness Scale [80] and the Fatigue Severity Scale [81, 82]. These tools are measures of daytime or wake-time sleepiness and tiredness. Net improvements were noted in all three surveys, with statistically significant results in the PROMIS Sleep Disturbance outcome measure (Figure 7).

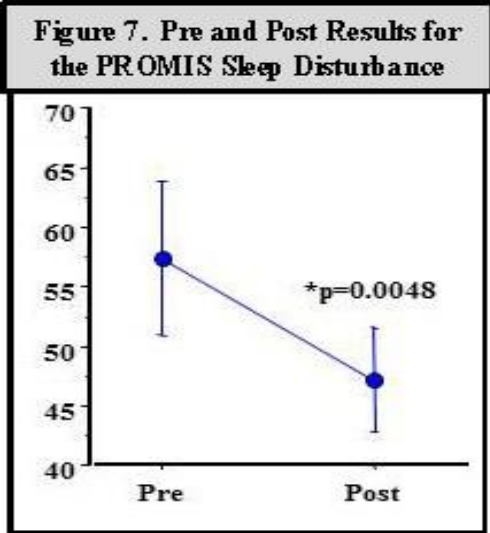

720

721 Bowel function was also measured by two self-reported assessment tools (Bristol Stool Scale and  
722 Bowel Survey) before and after 20 to 30 sessions of ReWalk training. Developed by Lewis SJ  
723 and Heaton KW in 1997, the Bristol Stool Scale (Scandinavian Journal of Gastroenterol. 1997  
724 Sep;32(9):920-4) is an indicator of stool consistency. Participants reported an overall softening  
725 of their stool with values, on average, reaching a “desirable” stool consistency after ReWalk  
726 training, and this finding was consistent with a reduction or discontinuation of the use of bowel  
727 medications.

728

729 The Bowel Survey accounts for important items, such as daily time spent for a bowel evacuation  
730 (BE), frequency per week of BEs, monthly frequency of incontinent episodes, the amount of  
731 medication, mechanical, digit, and/or flushing extraction methods used to achieve a BE. After 2

732

733

734 to 3 months of EAW at 4 to 6 hours per week, the group reported reduced time spent daily for a  
 735 BE, increased BE frequency per week and reduction or discontinuation of the amount of BE  
 736 medication and/or mechanical methods used (Table 4).  
 737

**Table 4. Bowel Function Changes Pre and Post EAW Training**

| S's | Frequency of Bowel Evacuations (#/week) |        | Time spent per Bowel Evacuation Day (minutes/day) |           | Bowel Accidents (# in past month) |        | Laxative, Stool Softener, Enema, and/or Digital Stimulation Use Change     |
|-----|-----------------------------------------|--------|---------------------------------------------------|-----------|-----------------------------------|--------|----------------------------------------------------------------------------|
|     | Pre                                     | Post   | Pre                                               | Post      | Pre                               | Post   |                                                                            |
| 1   | 1 to 2                                  | 3 to 4 | 60 to 180                                         | 15 to 30  | 1 to 2                            | 0      | Reduction in enema and digit stimulation                                   |
| 2   | 1 to 2                                  | 3 to 4 | 15 to 30                                          | 15 to 30  | 0                                 | 0      | Discontinuation of laxative, reduction in enema and digit stimulation      |
| 3   | 2 to 3                                  | 3 to 4 | 60 to 180                                         | 30 to 60  | 5 to 6                            | 0      | Discontinuation of laxative and stool softener                             |
| 4   | 1 to 2                                  | 3 to 4 | 60 to 180                                         | 30 to 60  | ≥ 7                               | 0      | Reduction in use of laxative, stool softener, enema, and digit stimulation |
| 5   | 5 to 6                                  | 5 to 6 | 60 to 180                                         | 30 to 60  | 1 to 2                            | 0      | Discontinuation of laxative and supplemental fiber                         |
| 6   | 3 to 4                                  |        | 30 to 60                                          |           | 3 to 4                            |        | Lost to follow-up                                                          |
| 7   | ≥ 7                                     | 5 to 6 | 60 to 180                                         | 30 to 60  | 1 to 2                            | 0      | Reduction in use of laxative, stool softener, enema, and digit stimulation |
| 8   | 3 to 4                                  | 3 to 4 | 15 to 30                                          | 15 to 30  | 3 to 4                            | 1 to 2 | Reduction in use of laxative, stool softener, enema, and digit stimulation |
| 9   | 3 to 4                                  | ≥ 7    | 15 to 30                                          | 15 to 30  | 0                                 | 0      | Reduction in use of laxative and stool softener                            |
| 10  | ≥ 7                                     | 5 to 6 | 60 to 180                                         | 60 to 180 | 3 to 4                            | 3 to 4 | No change                                                                  |
| 11  | 3 to 4                                  | 3 to 4 | 30 to 60                                          | 30 to 60  | 0                                 | 1 to 2 | Laxative and digital stimulation use increased, No change in enema use     |
| 12  | ≥ 7                                     | 5 to 6 | 5 to 15                                           | 5 to 15   | 0                                 | 0      | No change                                                                  |

738  
 739 **Summary of Pilot Study:** The pilot EAW study using the ReWalk performed at the JJPVAMC  
 740 trained 12 participants in the ReWalk exoskeleton for a combined total time of >1200 hours. EAW  
 741 of four to six hours per week was well-tolerated by the participants. Time in the exoskeleton  
 742 resulted in improved skill level. One-half of the participants reported clinically significant  
 743 improvements in bladder and bowel function and reduction in pain outcome measurements. There  
 744 were no study-related serious adverse events (SAEs). Skin abrasions at the points of contact with  
 745 the device occurred across 9 of the 12 participants; these were reported as “study-related adverse  
 746 events.” All skin abrasions were resolved with adjustments in padding and fit of the device to the  
 747 participants. One participant fell due to slipping on a wet floor but was not injured. These adverse  
 748 events were consistent with those reported by others for exoskeletal-assisted walking [43, 44, 83].

749 **II. OBJECTIVES**

750  
751 The short-term aims are to demonstrate in Veterans with SCI who are wheelchair users for indoor  
752 and outdoor mobility the efficacy for changes in QOL, improvements in body composition and the  
753 safety of home/community use of a powered exoskeleton for ambulation.

754  
755 The long-term aims are to share the knowledge gained from this research study with the  
756 Department of Veterans Affairs (DVA) Veterans Health Administration (VHA) Spinal Cord Injury  
757 Patient Care Centers' clinical staff about the training procedures, education of and the development  
758 of guidelines for the clinical prescription of the exoskeletal-assisted walking device for  
759 home/community use in Veterans with SCI.

760  
761 The study sample size is powered from preliminary data for the two primary outcomes [Mental  
762 Component Summary (MCS) of the Veterans Rand-36 (VR-36) and Spinal Cord Injury Quality of  
763 Life (SCI-QOL) assessment tool] and the major secondary outcome (total body fat mass). The  
764 secondary outcomes are exploratory and will not be used to power the study sample size.

765  
766 **A.** The **Primary Objectives** are to demonstrate that Veterans with chronic SCI of  $\geq$ six months  
767 duration who are medically stable and are wheelchair users for indoor and outdoor mobility as  
768 their standard of care (SOC) plus use of an exoskeletal-assisted walking device in their home and  
769 community environments will have clinically meaningful net improvements in the MCS/VR-36  
770 and in patient-reported outcomes for the SCI-QOL bladder, bowel, and pain item banks compared  
771 with those who use only SOC for home and community mobility. The primary outcomes to be  
772 assessed will be the MCS value and the sum T-score of the SCI-QOL bladder management  
773 difficulties, bowel management difficulties and pain interference item banks.

774  
775 **B.** The **Major Secondary Objective** is to demonstrate that participants who use the  
776 exoskeleton in addition to SOC will have at least a 1.0 kg loss in total body fat mass by the end of  
777 the four-month Intervention phase.

778  
779 **C.** The **Secondary Objectives** are to demonstrate that participants who use the exoskeleton  
780 in addition to SOC will have greater net improvements than the participants who receive only SOC  
781 on the following outcomes:

- 782  
783 1. Global Impression of Change Scale (Participant- and Companion-rated).

- 784 2. Disturbed sleep as measured by the T-score of the Patient Reported Outcomes  
785 Measurement Information System (PROMIS) Sleep Disturbance (short form).
- 786 3. Self-reported methods and measures of bowel function for:
- 787 a. frequency of bowel evacuation episodes, time per episode, number of self-reported  
788 “natural” bowel movements, the amount of bowel evacuation medications used  
789 (e.g., laxatives and/or stool softeners), frequency of enemas used, frequency of  
790 digital stimulation needed per week, stool consistency (by the Bristol Stool Scale),  
791 and frequency of bowel incontinence/accident episodes;
- 792 4. Sum T-score of the SCI Functional Index (SCI-FI) physical function short forms (basic  
793 mobility, self-care, fine motor, ambulation, wheelchair mobility, and assistive technology);
- 794 5. Sum T-scores of the SCI-QOL Emotional domain (Separate T-scores for: 1) anxiety,  
795 depression, grief-loss, trauma, and stigma item banks, and 2) positive affect and well-being,  
796 self-evaluation, and resilience item banks) (short form);
- 797 6. Sum T-score of the SCI-QOL Social Participation domain (ability to participate in social  
798 roles and activities, satisfaction with social roles and activities, and independence) (short  
799 form);
- 800 7. Lipid Profile for high density lipoprotein cholesterol (HDL-c), low density lipoprotein  
801 cholesterol (LDL-c), triglycerides (TG), and total cholesterol (TC);
- 802 8. Fasting plasma glucose (FPG) and insulin (FPI) levels for calculation of Homeostasis  
803 Model of Assessment-Insulin Resistance (HOMA-IR).

804  
805 **D. Hypotheses**

806  
807 Hypotheses are described for the Primary and Major Secondary Outcomes. In Veterans with  
808 chronic SCI:

- 809  
810 1. Primary Hypotheses (a and b):
- 811 a. 33% of the Intervention group compared with 10% of the Control group will  
812 demonstrate a clinically relevant change of  $\geq 4.0$  point improvement for the  
813 MCS/VR-36 for greater vitality and social functioning, and improved role-  
814 emotional and mental health from baseline to the end of the Intervention phase.
- 815 b. 42% of the Intervention group compared with 10% of the Control group will  
816 demonstrate a clinically significant change of 10% improvement from baseline to  
817 the end of the intervention phase on the sum T-score of the patient-reported



818 outcomes from the combined SCI-QOL item banks for bladder management  
819 difficulties, bowel management difficulties and pain interference.

820  
821 2. Major Secondary Hypothesis: It is anticipated that during the Training phase, at least 50%  
822 of the Intervention group will experience a total body fat mass loss of  $\geq 1.0$  kg from baseline  
823 to the end of the 25 $\pm$ 5 sessions. During the home/community use portion of the  
824 Intervention phase it is hypothesized that 35% of the total Intervention group will  
825 demonstrate at least maintenance of the  $\geq 1.0$  kg loss after four months of in-home use of  
826 the exoskeleton. As such, 35% of the Intervention group will demonstrate a loss of  $\geq 1.0$ kg  
827 of total body fat mass by the end of the Intervention phase relative to baseline values  
828 compared with 10% of the Control group.

### 829 830 **III. EXPERIMENTAL DESIGN**

831  
832 Research Design: A two-group (Intervention and Control), randomized, clinical trial will be  
833 performed with a one-year feasibility component. The Intervention group will consist of SOC plus  
834 exoskeletal-assisted walking (EAW). The Control group will consist of SOC only. The study will  
835 have two phases: Screening and Intervention. Fifteen VA SCI Services will participate as study  
836 sites. The study will require seven years in total to complete. A feasibility phase will be employed  
837 using a staggered start with six sites starting initially, four sites starting one year later, and five  
838 sites starting two years later. These initial six sites will be used to assess the start-up activities  
839 (hiring, training, equipment procurement, CIRB paperwork, etc.), the rate of recruitment and any  
840 other issues that may be of value for the successful completion of the study. Lessons learned will  
841 be implemented for the remaining sites.

#### 842 843 **A. Screening Phase**

844  
845 The Screening phase consists of pre-screening, consenting process, screening evaluations, baseline  
846 evaluations of the study outcomes, basic EAW training with a skills test, and randomization.  
847 During *pre-screening*, the potential participants will be first contacted by the Site Investigator,  
848 who is a SCI staff physician, through chart reviews, other physician referrals, pre-existing  
849 knowledge about their patients, access to contact information in a VA Informatics and Computing  
850 Infrastructure (VINCI) database, physician referrals at other VA hospitals, and/or through study  
851 flyers and study invitation letters. Study flyers may also be given to potential participants in the  
852 SCI Clinic, posted in local area hospitals, or distributed at local and national SCI events. Study

853 flyers may also be posted generally in areas where potential participants may see the information  
854 (i.e. local chapters of Veterans Organizations, SCI sporting events) and included in newsletters or  
855 journals with a focus on the SCI population. Each site is expected to prescreen at least 100 potential  
856 participants. Pre-screened eligible and interested potential participants will be referred by the Site  
857 ReWalk Trainers and/or Site Coordinators for initiation of the consenting process and scheduling  
858 of the screening evaluations. The *screening evaluations* will be performed only in consented  
859 participants by the Site Investigator, other Site Physician(s) and/or the site study team. These  
860 screening evaluations are for the inclusion/exclusion criteria for medical, physical and health-  
861 related eligibility. The screening evaluations include a history and physical examination (H&PE),  
862 a specific history of fragility fractures, unhealed traumatic fractures, swelling, bruising, redness,  
863 or other abnormalities of the lower extremities, International Standards for Neurological  
864 Classification of SCI (ISNCSCI) examination for neurological level and function [formerly called  
865 American Spinal Injury Association (ASIA) or American Spinal Injury International Standards  
866 Scale (AIS) examination], a BMD scan and a lateral foot x-ray of each calcaneus with potential  
867 for a clinical referral for a CT scan for further evaluation, if recommended. Participants who pass  
868 the inclusion/exclusion criteria will then undergo a home evaluation and companion identification  
869 for continued eligibility. The potential participant may have up to three companions who share in  
870 the EAW training with the participant. All companions will be provided a separate consenting  
871 process and will either sign an informed consent form or assent over the phone to be enrolled.  
872 Baseline evaluations will be performed only in those participants who have passed all screening  
873 criteria to this point. Once the baseline evaluations are completed, all participants will be fitted  
874 for the ReWalk and begin a five-session basic EAW training course. In order to avoid a biased  
875 group selection, all participants will be trained for five sessions of EAW basic skills. The EAW  
876 basic skills training will be conducted at the VA hospitals at fifteen sites, in the Community Based  
877 Outpatient Centers (CBOCs) under the same Federal Wide Assurance (FWA) as the sites, or in the  
878 participant's home/community. Only those who pass the EAW basic skills test (and all other  
879 screening criteria) will be eligible to be randomized to either the Intervention or Control group.  
880 Each site is expected to consent and screen at least 60 potential participants and randomize 4-24  
881 participants for an overall 160 randomized across 15 sites.

882  
883 Once randomized, the Intervention group will participate in 25±5 sessions of EAW Training and  
884 the Control group will participate in Orientation. The EAW training will be conducted at the VA  
885 hospitals at fifteen sites, in the CBOCs under the same FWA as the sites, or in the participant's  
886 home/community. During Orientation (while the Intervention group is being trained on the  
887 ReWalk), the Control group will attend weekly meetings at the study site or be contacted by phone

888 interview or secure messaging using My HealtheVet for review of their regular activities, which  
889 will serve as an “attention” balance to the Intervention group. Participants in the Intervention  
890 group will be required to pass the EAW Advanced Skills Test at the end of the 25±5 sessions of  
891 EAW Training prior to taking the device home. The companion is also required to pass part of  
892 this Advanced Skills Test. Participants (and their companions) who fail the EAW Advanced Skills  
893 Test will not be able to take the ReWalk home and will be counted as study “failures”. (Note: the  
894 PI and her team have observed that persons with SCI who are able to learn the basic standing and  
895 weight shift balance skills within five sessions, generally, also learn the advanced walking skills  
896 for home use within 20 to 30 sessions. As such, in order to screen out those participants who are  
897 likely to fail the EAW Advanced Skills Test for home use, the five-session testing criteria will be  
898 used for all participants before randomization.)

899  
900 A study form listing the number of participants for Pre-screening, Screening evaluations, five-  
901 session EAW training, and continuation (or not) to randomization will be recorded. The reasons  
902 for pre-screening and screening failures will be recorded.

903  
904 **B. Intervention Phase**

905  
906 After passing the EAW Advanced Skills Test at the end of the 25±5 sessions of EAW Training,  
907 the Intervention group will take the ReWalk home for four months. The Intervention group will  
908 continue to participate in wheelchair or other non-exoskeletal, non-wheelchair SOC activities as  
909 usual, but will also use the ReWalk in their home/community environment as per the specific  
910 recommendation by the study team during the home set-up. The Control group will participate in  
911 four months of SOC only, defined as usual wheelchair use (or other non-exoskeletal, non-  
912 wheelchair activities). Both groups will be required to complete a weekly Usual Activity Log.  
913 Participants in the Intervention group will additionally have the number of steps taken recorded  
914 from the step counter that is built-in to the ReWalk device, and the location and time of the EAW  
915 activities in an EAW weekly log. Site team members will contact participants in both groups on  
916 a weekly basis, either over the phone or through secure messaging using My HealtheVet to review  
917 the Usual and EAW Activity Logs and to identify problems or issues that may present. Participants  
918 in both groups will be encouraged to contact site team members with any questions pertaining to  
919 the study at any time. The Intervention and Control groups will receive the same pre- and post-  
920 outcome assessments and similar amounts of contact and attention from the study team during the  
921 Intervention phase. Participants in both groups will return to the site for an Intervention phase  
922 assessment of the outcome tests at month 2 and again at the end of month 4 (primary outcome

923 assessment time point). Across all study sites, 160 participants are to be randomized. Each site is  
924 expected to randomize between 4 and 24 participants. Adverse events will be recorded in both  
925 groups.

926  
927 **C. Post Study Participation for the Control Group**

928 In order to avoid potential participants not being interested in the study because of the 50% chance  
929 of not receiving the intervention, the Control group will be offered a two-month EAW training  
930 program after completion of the study protocol as an outpatient. Outcome data will not be collected  
931 during this outpatient, EAW post-study training for the Control group. The study site team will  
932 provide the EAW training to the former Control group participants during this phase and adverse  
933 events will be recorded during this post study component for the Control group. After participation  
934 in the study, participants may be considered for home use prescription of the exoskeleton by the  
935 clinical SCI Service.  
936

937  
938 **D. Study Duration and Timeline**

939 CS #2003 is projected to be a seven-year study. A staggered start approach will be employed with  
940 six sites starting during the first year of the study, four sites starting one year later, and five sites  
941 starting two years later. The six sites will have a one-year start-up, four years of enrollment and  
942 an additional one year of data collection and study closeout. The four sites will follow the same  
943 plan, but starting one year later with three years of enrollment. The remaining five sites will start  
944 two years later and have two years of enrollment and one year of data collection and closeout. All  
945 15 sites will complete data collection and study closeout in the sixth year of the study. An  
946 additional year for the Coordinating Center and Chair's Office is planned for data analyses and  
947 write-up (seven years in total). During the 6-week pre-start-up period, the Chair's Office will  
948 begin staff hiring procedures by providing position description (PD) postings for the sites and  
949 submit the protocol to the Central Institutional Review Board (CIRB) and local Research &  
950 Development (R&D) for review. The CSPCRPCC will submit the investigational device  
951 exemption (IDE) application to the FDA. A year will be needed for study start-up activities for  
952 the sites CIRB and local R&D submissions, ordering of the equipment (ReWalks and iDXA  
953 scanners), site staff hiring, and the ReWalk and study protocol training. During the enrollment  
954 years 1-4, participants will be prescreened, screened, and randomized. Year five will be used for  
955 continuation of data collection; no new enrollment will occur in year six. Data edits will be on-  
956 going throughout the five years of data collection. Year six will be needed for general wrap-up and  
957

958 closeout at the study sites. During Year 7, data analyses and manuscript writing will be performed.  
959 A detailed description may be found in the “Study Timeline” (Table 5).

960  
961 Participants in the Intervention group will require eight to nine months to complete the study.  
962 Participants in the Control group will require seven to nine months for study completion. The extra  
963 time is for the optional Control EAW in-hospital training sessions after the study is completed.  
964 This amount of time breaks out as follows. Once consented, potential participants will need one  
965 week for the screening evaluations, one week for the baseline outcome evaluations, and two weeks  
966 for the device fitting and five-session basic skills training and skills test. The Intervention group  
967 will go through a three-month Training phase, which includes the additional 25±5-sessions of  
968 supervised EAW training with their companion. After randomization, the Control group will  
969 participate in a two-month Orientation phase. The Intervention phase will require four months for  
970 both groups. The post evaluations will require one week. Those in the Control group will have the  
971 opportunity to participate in an additional two-month optional EAW outpatient training without  
972 data collection. A detailed description may be found in the “Training and Testing Schedule”  
973 (Table 6).

| Table 5.<br>Study Timeline             | Funding notification (8/<br>6-week Pre Start-up (no study costs) | Start-up                                                                                      |    |    |    | Y1                                                     |    |    |    | Y2                                                         |    |    |    | Y3                                                                                                   |    |    |    | Y4                                                                                        |    |    |    | Y5                                                        |    |    |    | Y6                                   |    |    |    |    |    |
|----------------------------------------|------------------------------------------------------------------|-----------------------------------------------------------------------------------------------|----|----|----|--------------------------------------------------------|----|----|----|------------------------------------------------------------|----|----|----|------------------------------------------------------------------------------------------------------|----|----|----|-------------------------------------------------------------------------------------------|----|----|----|-----------------------------------------------------------|----|----|----|--------------------------------------|----|----|----|----|----|
|                                        |                                                                  | Enrollment & Participant Data Collection<br>(160 Participants to be enrolled by end of Q4 Y4) |    |    |    |                                                        |    |    |    |                                                            |    |    |    |                                                                                                      |    |    |    |                                                                                           |    |    |    | Study Closeout                                            |    |    |    | Data Analyses and Manuscript Writing |    |    |    |    |    |
|                                        |                                                                  | FY16                                                                                          |    |    |    | FY17                                                   |    |    |    | FY18                                                       |    |    |    | FY19                                                                                                 |    |    |    | FY20                                                                                      |    |    |    | FY21                                                      |    |    |    | FY22                                 |    |    |    |    |    |
|                                        |                                                                  | Start-up Year (6 Sites)                                                                       |    |    |    | Enrollment Year 1 (6 Sites)<br>Start-up year (4 Sites) |    |    |    | Enrollment Year 2 (6 Sites)<br>Enrollment Year 1 (4 Sites) |    |    |    | Enrollment Year 3 (6 Sites)<br>Enrollment Year 2 (4 Sites)<br>Start-up & Enrollment Year 1 (5 Sites) |    |    |    | Enrollment Year 4 (6 Sites)<br>Enrollment Year 3 (4 Sites)<br>Enrollment Year 2 (5 Sites) |    |    |    | Participant Carry-over and Study Close-out (All 15 sites) |    |    |    | Study analyses and write-up          |    |    |    |    |    |
|                                        |                                                                  | Q1                                                                                            | Q2 | Q3 | Q4 | Q1                                                     | Q2 | Q3 | Q4 | Q1                                                         | Q2 | Q3 | Q4 | Q1                                                                                                   | Q2 | Q3 | Q4 | Q1                                                                                        | Q2 | Q3 | Q4 | Q1                                                        | Q2 | Q3 | Q4 | Q1                                   | Q2 | Q3 | Q4 | Q1 | Q2 |
| Administration start up                | x                                                                | x                                                                                             |    |    |    |                                                        |    |    |    |                                                            |    |    |    |                                                                                                      |    |    |    |                                                                                           |    |    |    |                                                           |    |    |    |                                      |    |    |    |    |    |
| Chair's Office CIRB                    | x                                                                | x                                                                                             |    |    |    |                                                        |    |    |    |                                                            |    |    |    |                                                                                                      |    |    |    |                                                                                           |    |    |    |                                                           |    |    |    |                                      |    |    |    |    |    |
| CSPCRPCC IDE to FDA                    | x                                                                | x                                                                                             |    |    |    |                                                        |    |    |    |                                                            |    |    |    |                                                                                                      |    |    |    |                                                                                           |    |    |    |                                                           |    |    |    |                                      |    |    |    |    |    |
| Chair/Sites' PDs                       | x                                                                | x                                                                                             |    |    |    |                                                        |    |    |    |                                                            |    |    |    |                                                                                                      |    |    |    |                                                                                           |    |    |    |                                                           |    |    |    |                                      |    |    |    |    |    |
| Chair/Sites' R&D                       | x                                                                | x                                                                                             |    |    |    |                                                        |    |    |    |                                                            |    |    |    |                                                                                                      |    |    |    |                                                                                           |    |    |    |                                                           |    |    |    |                                      |    |    |    |    |    |
| Chair's funding received               | x                                                                | x                                                                                             |    |    |    |                                                        |    |    |    |                                                            |    |    |    |                                                                                                      |    |    |    |                                                                                           |    |    |    |                                                           |    |    |    |                                      |    |    |    |    |    |
| Chair/Sites' staff hiring              | x                                                                |                                                                                               |    |    | x  |                                                        |    |    |    |                                                            |    |    |    | x                                                                                                    |    |    |    |                                                                                           |    |    |    |                                                           |    |    |    |                                      |    |    |    |    |    |
| Sites' CIRB                            | x                                                                | x                                                                                             |    |    |    |                                                        |    |    |    |                                                            |    |    |    |                                                                                                      |    |    |    |                                                                                           |    |    |    |                                                           |    |    |    |                                      |    |    |    |    |    |
| Equipment contracts                    | x                                                                | x                                                                                             |    |    |    |                                                        |    |    |    |                                                            |    |    |    |                                                                                                      |    |    |    |                                                                                           |    |    |    |                                                           |    |    |    |                                      |    |    |    |    |    |
| Equipment ships to sites               |                                                                  | x                                                                                             | x  |    |    |                                                        |    |    |    |                                                            |    |    |    | x                                                                                                    |    |    |    |                                                                                           |    |    |    |                                                           |    |    |    |                                      |    |    |    |    |    |
| iDXA Site training                     |                                                                  | x                                                                                             | x  | x  | x  | x                                                      |    |    |    |                                                            |    |    |    | x                                                                                                    | x  |    |    |                                                                                           |    |    |    |                                                           |    |    |    |                                      |    |    |    |    |    |
| ReWalk onsite training <sup>1</sup>    |                                                                  | x                                                                                             | x  | x  | x  | x                                                      |    |    |    |                                                            |    |    |    | x                                                                                                    | x  |    |    |                                                                                           |    |    |    |                                                           |    |    |    |                                      |    |    |    |    |    |
| ReWalk training follow-up <sup>2</sup> |                                                                  |                                                                                               |    | x  | x  | x                                                      |    |    |    |                                                            |    |    | x  | x                                                                                                    |    |    |    |                                                                                           |    |    | x  | x                                                         |    |    |    |                                      |    |    |    |    |    |
| Study meetings                         |                                                                  |                                                                                               | x  |    |    | x                                                      |    |    |    |                                                            |    |    |    |                                                                                                      | x  |    |    |                                                                                           |    |    |    | x                                                         |    |    |    |                                      |    |    |    |    |    |
| Pre Screening                          |                                                                  |                                                                                               | x  | x  | x  | x                                                      | x  | x  | x  | x                                                          | x  | x  | x  | x                                                                                                    | x  | x  | x  | x                                                                                         | x  | x  |    |                                                           |    |    |    |                                      |    |    |    |    |    |
| Screening                              |                                                                  |                                                                                               |    | x  | x  | x                                                      | x  | x  | x  | x                                                          | x  | x  | x  | x                                                                                                    | x  | x  | x  | x                                                                                         | x  |    |    |                                                           |    |    |    |                                      |    |    |    |    |    |
| Randomization                          |                                                                  |                                                                                               |    |    | x  | x                                                      | x  | x  | x  | x                                                          | x  | x  | x  | x                                                                                                    | x  | x  | x  | x                                                                                         | x  |    |    |                                                           |    |    |    |                                      |    |    |    |    |    |
| Data collection/edits                  |                                                                  |                                                                                               |    |    | x  | x                                                      | x  | x  | x  | x                                                          | x  | x  | x  | x                                                                                                    | x  | x  | x  | x                                                                                         | x  |    |    |                                                           |    |    |    |                                      |    |    |    |    |    |
| Study close out                        |                                                                  |                                                                                               |    |    |    |                                                        |    |    |    |                                                            |    |    |    |                                                                                                      |    |    |    |                                                                                           |    |    |    |                                                           |    |    |    |                                      |    |    |    |    |    |
| Data analyses/writing                  |                                                                  |                                                                                               |    |    |    |                                                        |    |    |    |                                                            |    |    |    |                                                                                                      |    |    |    |                                                                                           |    |    |    |                                                           |    |    |    |                                      |    |    |    |    |    |

**Table 5 Legend.** A total of 160 (80/group) participants will be enrolled and randomized across all 15 study sites. CIRB=Central Institutional Review Board (VA); CSPCRPCC =Cooperative Studies Program Clinical Research PharmacyCoordinating Center; IDE=Investigational Device Exemption; FDA=Food and Drug Administration; PD=Position descriptions for hiring staff; R&D=Research and Development Committee (at Sites and Chair's Office); iDXA=DXA scanner for bone mineral density and total body composition. <sup>1</sup>ReWalk Site training is performed by ReWalk Robotics, Inc. as onsite training. <sup>2</sup>ReWalk Site training follow-up is performed by the CS #2003 National Coordinator as a follow-up training at the sites.

**Table 6. Testing and Training Schedules**

| Phases:                                      | Screening Phase  |                                            | Orientation/Training Phase              |                                                      | Intervention Phase               |                                                     |          |          | Control EAW                                       |                |  |
|----------------------------------------------|------------------|--------------------------------------------|-----------------------------------------|------------------------------------------------------|----------------------------------|-----------------------------------------------------|----------|----------|---------------------------------------------------|----------------|--|
|                                              | Month 1          |                                            | Mo 2 to 4                               |                                                      | Mo 5                             | Mo 6                                                | Mo 7     | Mo 8     | Mo 9                                              | Mo 9 & 10      |  |
|                                              | 1 to 4           |                                            | 5 to 16                                 |                                                      | 17 to 20                         | 21 to 24                                            | 25 to 28 | 29 to 32 | 33                                                | 33 to 40       |  |
| Pre Screening                                | Consent Obtained | Screening Evaluations                      | Orientation/Training                    |                                                      | In-Home/Community                |                                                     |          |          | Post Intervention Phase Evaluations (Both Groups) | (no Data)      |  |
|                                              |                  |                                            | Control Group (Standard of Care Review) | Orientation/Training Phase Evaluations (Both Groups) | Control Group (Standard of Care) |                                                     |          |          |                                                   |                |  |
|                                              |                  |                                            | Intervention Group (EAW Training)       |                                                      |                                  | Intervention Group (Standard of Care plus Home EAW) |          |          |                                                   |                |  |
| SCREENING Evaluations                        |                  | Pre Evaluations (Baseline for both groups) |                                         |                                                      |                                  |                                                     |          |          |                                                   |                |  |
| History & Physical Exam                      |                  |                                            | x                                       |                                                      |                                  |                                                     |          |          |                                                   |                |  |
| ISNCSCI Exam                                 |                  |                                            | x                                       |                                                      |                                  |                                                     |          |          |                                                   | x              |  |
| BMD Scan                                     |                  |                                            | x                                       |                                                      |                                  |                                                     |          |          |                                                   |                |  |
| Bi-lateral foot x-ray                        |                  |                                            | x                                       |                                                      |                                  |                                                     |          |          |                                                   |                |  |
| CT scan, if indicated                        |                  |                                            | x                                       |                                                      |                                  |                                                     |          |          |                                                   |                |  |
| Home Evaluation                              |                  |                                            | x                                       |                                                      |                                  |                                                     |          |          |                                                   |                |  |
| Companion Evaluation                         |                  |                                            | x                                       |                                                      |                                  |                                                     |          |          |                                                   |                |  |
| OUTCOME Assessments                          |                  | 5 Session EAW Training                     |                                         |                                                      |                                  |                                                     |          |          |                                                   |                |  |
| iDXA Body Composition                        |                  |                                            | x                                       |                                                      |                                  |                                                     |          |          |                                                   | x              |  |
| VR-36                                        |                  |                                            | x                                       |                                                      |                                  |                                                     |          |          |                                                   | x              |  |
| SCI-QOL                                      |                  |                                            | x                                       |                                                      |                                  |                                                     |          |          |                                                   | x              |  |
| Global Impression of Change Scale            |                  |                                            | x                                       |                                                      |                                  |                                                     |          |          |                                                   | x              |  |
| PROMIS Sleep Disturbance                     |                  |                                            | x                                       |                                                      |                                  |                                                     |          |          |                                                   | x              |  |
| SCI-FI                                       |                  |                                            | x                                       |                                                      |                                  |                                                     |          |          |                                                   | x              |  |
| Bowel Function                               |                  |                                            | x                                       |                                                      |                                  |                                                     |          |          |                                                   | x              |  |
| Blood draw (Lipids/Glu/Ins)                  |                  | x                                          |                                         |                                                      |                                  |                                                     |          |          | x                                                 |                |  |
| QUALITY CONTROL Data                         |                  | Randomization                              |                                         |                                                      |                                  |                                                     |          |          |                                                   |                |  |
| EAW Basic Skills Test                        |                  |                                            | x                                       |                                                      |                                  |                                                     |          |          |                                                   | x              |  |
| Usual Activity Log                           |                  |                                            | x                                       | 1 x Weekly                                           |                                  | 1 x Weekly                                          |          |          |                                                   |                |  |
| Step Counter (Intervention group only)       |                  |                                            | x                                       | Each Session                                         |                                  | 1 x Weekly                                          |          |          |                                                   | x              |  |
| EAW Mobility Tests (Intervention group only) |                  |                                            | x                                       | Each Session                                         |                                  | x x                                                 |          |          |                                                   | x              |  |
| EAW Activity Log (Intervention group only)   |                  |                                            | x                                       |                                                      |                                  | 1 x Weekly                                          |          |          |                                                   | x              |  |
| EAW Advanced Skills Test                     |                  |                                            | x                                       |                                                      |                                  |                                                     |          |          |                                                   | x              |  |
| Home set-up                                  |                  |                                            | x                                       |                                                      |                                  | PRN Home Interim visits                             |          |          |                                                   |                |  |
| Exit survey                                  |                  |                                            |                                         |                                                      |                                  |                                                     |          |          | x <sup>1</sup>                                    | x <sup>1</sup> |  |

976  
977  
978

| <b>Table 6. Legend</b>                |                                                                                                                                                                                                                                                                                                                                                                                                                                                                                                                                                                                                                                                                                                                                                                                                                |
|---------------------------------------|----------------------------------------------------------------------------------------------------------------------------------------------------------------------------------------------------------------------------------------------------------------------------------------------------------------------------------------------------------------------------------------------------------------------------------------------------------------------------------------------------------------------------------------------------------------------------------------------------------------------------------------------------------------------------------------------------------------------------------------------------------------------------------------------------------------|
| <b>Home and Companion Evaluations</b> | Home and companion evaluations will be performed on all participants who have passed the medical screening criteria and will be performed prior to randomization to avoid unbalanced or biased groups.                                                                                                                                                                                                                                                                                                                                                                                                                                                                                                                                                                                                         |
| <b>OUTCOME Assessments</b>            | Outcome assessments will only be performed on those potential participants who have passed all screening criteria. Screening failures and reasons will be recorded on study forms.                                                                                                                                                                                                                                                                                                                                                                                                                                                                                                                                                                                                                             |
| <b>SOC</b>                            | Standard of care is defined as wheelchair use and usual lifestyle activities.                                                                                                                                                                                                                                                                                                                                                                                                                                                                                                                                                                                                                                                                                                                                  |
| <b>Standard of Care Review</b>        | Participants complete an interview with a study team member to review usual lifestyle activities and Usual activity weekly log.                                                                                                                                                                                                                                                                                                                                                                                                                                                                                                                                                                                                                                                                                |
| <b>EAW Training</b>                   | Intervention group attends the exoskeletal-assisted walking training for 25±5 sessions.                                                                                                                                                                                                                                                                                                                                                                                                                                                                                                                                                                                                                                                                                                                        |
| <b>EAW Advanced Skills Test</b>       | EAW Advanced Skills Test is a combined participant/user and companion test. NOTE: Participants and companions must pass the EAW Advanced Skills Test to continue to home use; those who do not are treated as "study failures".                                                                                                                                                                                                                                                                                                                                                                                                                                                                                                                                                                                |
| <b>Home set-up</b>                    | Only those participants and their companions who pass the EAW Advanced Skills Test will continue on to home/community use. For these participants, a second home visit for set-up will be performed by a study team member from the Site.                                                                                                                                                                                                                                                                                                                                                                                                                                                                                                                                                                      |
| <b>Exit survey</b>                    | Exit surveys may be completed with the Post Intervention Phase Evaluations for both groups or after the optional EAW in-hospital training for the control group                                                                                                                                                                                                                                                                                                                                                                                                                                                                                                                                                                                                                                                |
| <b>Abbreviations</b>                  | EAW = Exoskeletal-assisted walking; Intervention = Standard of care wheelchair use (i.e. usual lifestyle activities) plus Exoskeletal-assisted walking; Control = Standard of care, wheelchair use (i.e. usual lifestyle activities); ISNCSCI Exam = International Standards for Neurological Classifications for SCI (formerly, ASIA and AIS); BMD Scan = bone mineral density scan; iDXA = Dual energy x-ray absorptiometry scan for fat and lean tissue masses; CT = Computed tomography; SCI-QOL = Spinal Cord Injury Quality of Life patient-reported outcomes tool; PROMIS Sleep Disturbance = Patient Reported Outcomes Measurement Information System component for Sleep Disturbance; VR-36 = Veterans Rand-36; and SCI-FI = SCI Functional Index of patient-reported outcomes for physical function. |



979 **IV. PARTICIPANT RECRUITMENT**

980  
981 **A. Recruitment and Screening**

982 The Site Investigator (a SCI staff physician) will be responsible for initially approaching each  
983 potential participant to be recruited and screened for eligibility. S/he will pre-screen from the  
984 medical records, referrals from other SCI physicians, known SCI patients for potential participants,  
985 access to contact information in a VINCI database (VA hubs and spokes and VAs geographically  
986 near participating local sites), and physician referrals at other VA hospitals. The Site Investigator  
987 may send study flyers and study invitation letters to potential participants. Additionally, the study  
988 flyers may be given to potential participants in the SCI Clinic, posted in local area hospitals and  
989 on local site FaceBook pages, or distributed at local and national SCI events. Study flyers may  
990 also be posted generally in areas where potential participants may see the information (i.e. local  
991 chapters of Veterans Organizations, SCI sporting events) and included in newsletters or journals  
992 with a focus on the SCI population. After the initial contact, by the Site Investigator, the Site  
993 Coordinator and/or Site ReWalk Trainers will participate and assist in the recruitment and  
994 consenting process. If the individual provides informed consent to participate, s/he will be fully  
995 evaluated by the Site Investigator and other appropriate members of the site’s study team.  
996 Screening evaluations will be performed in all participants. In order to assure that by completion  
997 of EAW training each participant is competent to use the exoskeleton in the home/community  
998 environment, a five-session basic EAW training with a Basic Skills Test will be conducted on all  
999 participants to determine the eligibility of the participant to be randomized. Please note that the  
1000 inclusion/exclusion criteria are also designed to exclude participants who have weak or absent arm,  
1001 hand, and/or trunk stability and control, and thus wean out those who are not likely to achieve the  
1002 necessary skills for home/community use. A pre-approved home evaluation and companion  
1003 interview will be established and evaluated early in the screening process for all participants. Those  
1004 who have provided written informed consent and have passed all Screening criteria including the  
1005 EAW Basic Skills Test will be eligible to be randomized. One hundred-sixty participants (N=160)  
1006 will be randomized and assigned to either the SOC plus EAW Intervention group (n=80) or the  
1007 SOC Control group (n=80) across all 15 study sites. Each site is expected to randomize between  
1008 4 and 24 participants. Once a participant has been randomized, s/he may not be randomized again.

1010  
1011 **B. Randomization System**

1012 An Interactive Touch Tone Randomization System (ITTRS) will be used for randomization within  
1013

1014 each site. This system will be accessed through the Cooperative Studies Program Coordinating  
1015 Center at the Perry Point VA Medical Center, Perry Point, MD.

### 1016 **C. Population to be Studied**

1018 One hundred-sixty male or female Veteran or active duty military personnel with chronic SCI, of  
1019  $\geq$ six months duration, who are  $\geq$ 18 years of age, and who are medically stable and wheelchair  
1020 users for indoor and outdoor mobility, will be eligible for screening to be enrolled in the study.  
1021 All potential participants will be Veterans or active duty military personnel with SCI who are  
1022 affiliated with or transferred to one of the fifteen VA SCI Services that will be participating in this  
1023 study. Study participants will generally be outpatients with the exception of those inpatients who  
1024 meet the eligibility criteria and are approved by the Site Investigator (e.g., some inpatients may  
1025 have been admitted for a wheelchair fitting or another non-medical reason). Non-veterans, other  
1026 than active duty military personnel getting treatment at the VA, will not be eligible to participate.  
1027 Eighty participants will receive SOC plus EAW (Intervention group) and 80 will receive SOC  
1028 (Control group). It is expected that no more than 15% of the participants will withdraw early  
1029 (dropout rate) and this attrition rate is expected to be evenly distributed between the two groups  
1030 (12 withdrawals/group). One hundred-thirty-six participants are expected to complete the study  
1031 (68/group).  
1032

### 1033 **V. INTERVENTION AND METHODS OF TREATMENT**

1034  
1035 Standard of care (SOC) is defined as wheelchair use for indoor and outdoor mobility and any other  
1036 non-wheelchair activities (such as, standing frame use, swimming, arm bikes for cycling, etc.) that  
1037 the participant may engage in during their usual lifestyle activities. The Intervention group  
1038 receives SOC activities plus EAW training ( $25\pm 5$  sessions) to develop a skill set to use the  
1039 exoskeleton, accompanied by their companion, during a four-month trial with the exoskeleton in  
1040 the participant's home/community environment. The Control group will receive SOC alone.  
1041 Accurate recording of SOC and EAW activities is an important component of this study. Two  
1042 activity logs will be obtained: 1) Usual Activity Log and 2) EAW Activity Log. The Usual Activity  
1043 Log is designed to capture usual lifestyle physical and recreational activities (non-EAW) that the  
1044 Veteran or member of the military with SCI participates in weekly. Both groups will be instructed  
1045 to record any type and amount of time of physical or recreational wheelchair or non-wheelchair  
1046 activity (i.e., standing frame use, swimming, etc.) that is being performed during the course of the  
1047 two-three month Orientation/Training and four-month Intervention phase of the study. EAW and  
1048

1049 Usual Activity Logs with check-off categorical grouping answers for the type and duration of the  
1050 activity will be provided to reduce participant burden and to provide standardized answers for  
1051 analysis. The EAW Activity Log will be used by the Intervention group only to record weekly use  
1052 for location and time spent in the ReWalk device during the training (hospital halls, SCI service,  
1053 grounds, CBOCs, home/community etc.) and home/community (e.g., sidewalks, local mall, in  
1054 home, parks, etc.) phases of the study. The number of steps taken in the ReWalk during training  
1055 and home use will be recorded on a weekly basis from the built-in step counter. Detailed  
1056 descriptions of the Intervention and Control schedules of testing are provided (Table 6).  
1057 Information from the activity logs may be given to the Coordinator over the phone, in-person, or  
1058 through secure messaging, using My HealtheVet.

## 1059 **VI. METHODS OF FOLLOW UP**

1061 The Orientation/Training phase is performed in the hospital or in the participant's  
1062 home/community. Participants in the Intervention group will be required to meet with the study  
1063 team for 3 to 5 sessions per week for 20 to 30 sessions. Participants who miss sessions will be  
1064 contacted by the Site's Study Coordinator or ReWalk Trainers for rescheduling. During the  
1065 Intervention phase, the participants will be using the exoskeleton in their home/community.  
1066 During this phase, follow-up contact by the study team members with the participants on a weekly  
1067 basis will be critical for compliance and troubleshooting of any problems. This contact will be  
1068 necessary to assist the participants with compliance of completion of the Usual Activity Log and  
1069 the EAW Activity Log and identification of adverse events in the Intervention group. Contact will  
1070 be made in person, over the phone, or through secure messaging, using My HealtheVet.  
1071

1072 During the Orientation/Training phase, the Control group will make weekly outpatient visits and/or  
1073 receive contact from members of the site's study team on a weekly basis. During the Intervention  
1074 phase, follow-up contact by the study team members with the participants in the Control group  
1075 will be at a minimum of one time weekly. This contact will be critical for compliance of  
1076 completion of the Usual Activity Log and identification of adverse events in the Control group.  
1077 Site team members will be instructed in the weekly and monthly participant contact procedures for  
1078 both groups to collect data, encourage compliance, and identify issues. Contact will be made in  
1079 person, over the phone, or through secure messaging, using My HealtheVet.  
1080

1081 Primary and Secondary outcome assessments will be completed at the SCI Centers at the end of  
1082 month 2 and month 4 of the Intervention phase in both groups.  
1083

1084 **VII. METHODS OF ASSURING UNIFORMITY OF INTERVENTION**

1085  
1086 Uniformity of the intervention within and across the sites is critical. Standardization of staff  
1087 training procedures has been identified for two main areas: 1) EAW components for the home  
1088 evaluation, companion interview, ReWalk fitting, EAW Basic Skills Test, EAW walking skill  
1089 progression, EAW walking test evaluations, EAW Advanced Skills Test, and EAW Activity Log;  
1090 and 2) administration of the outcome assessments for the VR-36, SCI-QOL, Global Impression of  
1091 Change Scale, PROMIS Sleep Disturbance, Bowel function, and SCI-FI. Onsite training of  
1092 procedures will be conducted at each site in order to standardize EAW training techniques across  
1093 the sites. The ReWalk Trainers will be required to demonstrate knowledge and capability to  
1094 perform the required procedures related to the EAW training and assessments. The Study  
1095 Coordinator at each site will be responsible for the QOL outcome assessments. This strengthens  
1096 the study because the staff persons providing the intervention are not the ones performing the  
1097 outcome assessments.

1098 **VIII. DETERMINING ELIGIBILITY**

1100  
1101 The determination of eligibility for this study has several levels. First, the Site Physician will pre-  
1102 screen potential participants from the medical records and knowledge of the person to include  
1103 those with traumatic or non-traumatic, complete or incomplete SCI duration  $\geq 6$  months who are  
1104  $\geq 18$  years old and are wheelchair-dependent for indoor and outdoor mobility.

1105  
1106 Second are the Screening evaluations; those potential participants who pass pre-screening and are  
1107 interested to be consented will begin the consenting process with the Site Physician and site study  
1108 team. Those who complete the consenting process will undergo a series of screening evaluations  
1109 that include: a BMD scan, fracture history, lateral foot x-rays of each calcaneus, history and  
1110 physical examination and ISNCSCI assessment to determine medical wellness, anthropometric  
1111 compatibility with the device, level and completeness of injury, hand function, ability to have a  
1112 companion, and a home evaluation for suitability. Female participants will also receive pregnancy  
1113 testing. The specific inclusion and exclusion criteria are itemized below.

1114 **A. Inclusion/Eligibility Criteria**

1115 **Veteran/Active Duty Participants:**

- 1116  
1117 1. Veterans or active duty military personnel who are at least 18 years of age;  
1118 2. Traumatic or non-traumatic SCI  $\geq 6$  months duration of SCI;

- 1119 3. Wheelchair-user for indoor and outdoor mobility;
- 1120 4. Anthropometric compatibility with the device:
  - 1121 a. Weight <220 lb. (100 kg),
  - 1122 b. Thigh length between 14 and 19 in (36 and 48 cm),
  - 1123 c. Shank length between 17 and 22 in (43 and 55 cm);
- 1124 5. Able to hold the crutches in hands without modifications;
- 1125 6. Able to have a companion who can attend approximately one-third of the training sessions
- 1126 who will assist them at home and in the community; and
- 1127 7. Able to provide informed consent.

1128  
1129 **Companion Participants:**

- 1130 1. Male/female greater than or equal to 18 years of age;
- 1131 2. Demonstrates understanding of the time commitment to be a companion;
- 1132 3. The companion and the user are willing to receive training on how to assist the user with
- 1133 learning to use the device;
- 1134 4. The companion agrees to ensure that the exoskeleton is used with the crutches at all times;
- 1135 5. Site Physician and study team members must deem the companion physically able to assist
- 1136 the participant with tasks outlined in the exoskeleton skills inventory (i.e. the companion
- 1137 is able-bodied and is physically able to bend, stoop, squat, kneel, etc.)

1138  
1139 **B. Exclusion criteria**

1140 **Veteran/Active Duty Participants:**

- 1141 1. Diagnosis of neurological injury other than SCI;
- 1142 2. Progressive condition that would be expected to result in changing neurological status;
- 1143 3. Severe concurrent medical disease, illness or condition judged to be contraindicated by the
- 1144 Site Physician;
- 1145 4. Unhealed or unstable traumatic or high impact lower extremity fracture (definition below)
- 1146 of any duration that is in the clinical judgement of the study physician to be exclusionary
- 1147 for standing and walking;
- 1148 5. Knee BMD < 0.60 gm/cm<sup>2</sup>;
- 1149 6. Total hip BMD T-scores < -3.5;
- 1150 7. Fragility, minimal trauma or low impact fracture of the lower extremity since spinal cord
- 1151 injury (definition below);
- 1152 8. Untreatable severe spasticity judged to be contraindicated by the Site Physician;
- 1153 9. Flexion contracture > 15° at the hip and/or > 10° at the knee;

- 1154 10. Limitations in ankle range of motion that cannot be adapted with an orthotic device (plantar  
1155 flexion > 0°);
- 1156 11. Untreated or uncontrolled hypertension (systolic blood pressure >140 mmHg; diastolic  
1157 blood pressure >90 mmHg);
- 1158 12. Unresolved orthostatic hypotension (systolic blood pressure <90 mmHg; diastolic blood  
1159 pressure <60 mmHg) as judged to be contraindicated by the Site Physician;
- 1160 13. Current pressure ulcer of the arms, trunk, pelvic area, or lower extremities;
- 1161 14. Psychopathology documentation in the medical record or history that may conflict with  
1162 study objectives; and/or
- 1163 15. Pregnancy or women who plan to become pregnant during the study period.

1164  
1165 Definition of a traumatic or high impact fracture: Fracture from a forceful event, such as seen in  
1166 any or all of the following, but not limited to these circumstances:

- 1167 ✓ Fracture from a motor vehicle accident
- 1168 ✓ Fracture from a fall from a height greater than adult height standing (i.e. down steps or  
1169 stairs)
- 1170 ✓ Fracture from a heavy object falling on any lower extremity body part

1171  
1172 Definition of a fragility, minimal trauma, or low impact fracture in the nonSCI population by the  
1173 National Osteoporosis Foundation (NOF) is: Any fall from a standing height or less, that results  
1174 in a fracture.” Normal bones should be able to sustain a fall from this height, without a fracture,  
1175 unless there is some underlying cause to suspect a bone disorder, such as osteoporosis or  
1176 osteopenia that weakens bone structure. In SCI, a fragility fracture may include any, or all, but  
1177 are not limited to the following conditions and/or circumstances:

- 1178 ✓ Fracture that occurred without the person having knowledge of the occurrence or cause
- 1179 ✓ Fracture that resulted from a fall from a wheelchair, bed, toilet, etc.
- 1180 ✓ Fracture that occurred while performing stretching
- 1181 ✓ Fracture that resulted from, or during, a transfer
- 1182 ✓ Fracture from bumping or banging the lower extremity
- 1183 ✓ Fracture from dropping the foot to the ground or wheelchair footplate
- 1184 ✓ Fracture from a light object falling on any lower extremity body part
- 1185 ✓ Fracture from carrying something or someone in their lap

1186  
1187 And thirdly, potential participants who pass the Screening criteria (i.e., the inclusion and exclusion  
1188 criteria) will be eligible for the five-session EAW basic training. The final part in the eligibility

1189 process is the EAW Basic Skills Test after the five-session initial training; those potential  
1190 participants who pass the EAW Basic Skills Test are then eligible to be randomized.

1191  
1192 **C. Exoskeleton Component (“Training the Trainers”)**

1193 Basic and Advanced ReWalk training courses will be provided by ReWalk Robotics, Inc. at each  
1194 of the sites for the designated ReWalk Trainers. Trainers will be taught how the device functions  
1195 to accomplish walking. Initially, the Trainers will practice using the exoskeleton with another  
1196 able-bodied member of the research team. The Trainers will practice fitting the device and teaching  
1197 the able-bodied person how the device functions and how to use the computer settings. Once the  
1198 Trainers are competent with the device in an able-bodied person, they will be able to fit the device  
1199 and train the enrolled Veterans with SCI in the exoskeleton. Trainers will demonstrate an  
1200 understanding of the system components and be able to teach the participants and their walking  
1201 companions the system components. Trainers will demonstrate understanding of how the  
1202 communicator functions and what the icons represent. Trainers will know where the different wire  
1203 connections should be placed and understand the different error codes if a connection were to  
1204 become loose, or if the battery power is low. They will be required to identify any defect or damage  
1205 to any system components to ensure continued safe use. They will demonstrate knowledge of the  
1206 strapping system and locations of required strapping. They will need to have working knowledge  
1207 of all the screw locations to be able to make adjustments in the limb lengths. Trainers will need to  
1208 have a working knowledge of the exoskeleton software and what each component does and how  
1209 changing the values will change the walking parameters. The Trainers will need to be able to  
1210 follow the standard operating procedures (SOP) manual in the event that there is a defective  
1211 system.  
1212

1213  
1214 **D. ReWalk Fitting**

1215 The goals of the fitting are to properly measure the hip and lower limb segments of the participant  
1216 and to adjust the exoskeleton to those measurements. The proper fit to the exoskeleton consists of:  
1217 pelvic width, determined according to the width of the user’s waist; thigh length, by measuring  
1218 from the most prominent point of the greater trochanter to the joint line of the knee; and shank  
1219 length, determined by measuring the knee joint line center to the bottom of the foot. Each Trainer  
1220 will be required to observe areas of contact points with the device as these may be prone to skin  
1221 breakdown. Additional padding, as applicable will be added in appropriate locations in order to  
1222 avoid any skin breakdown. If skin breakdown occurs, Trainers and/or the Site Physician will need  
1223

1224 to determine if training should be discontinued, or if adjustments to the padding can be put in place  
1225 to avoid farther breakdown and allow the wound to heal with continued training. Skin breakdowns  
1226 are to be reported as adverse events (AEs), unless otherwise indicated as an SAE according to the  
1227 SAE criteria.

## 1228 **E. EAW Basic Skills Test**

1230 Initially, the participants will be required to learn to transfer in and out of the device, and how to  
1231 don and doff the device. They will be provided an explanation of how the system works and what  
1232 to expect when using the exoskeleton for ambulation. Videos may be used to assist with the verbal  
1233 explanations. Each participant will be required to demonstrate the ability to perform a set of basic  
1234 skills at the level of 4 (Minimal Assist) according to the following Functional Independence  
1235 Measurement (FIM) scale rating:  
1236

### 1237 FIM Scale for level of assistance (LOA) during EAW

- 1238 7 Complete Independence (CI) (timely, safely, no assistive device used) (Note, while CI is a  
1239 part of the FIM scale, it is not applicable for this study as all participants will require the use  
1240 of the exoskeleton, thus negating the ability of complete independence.);
- 1241 6 Modified Independence (MI) (extra time, patient requires an assistive device, no  
1242 assistance);
- 1243 5 Supervision (S) (cuing, coaxing, prompting);
- 1244 4 Minimal Assist (Min) (performs 75% or more of task);
- 1245 3 Moderate Assist (Mod) (performs 50%-74% of task);
- 1246 2 Maximal Assist (Max) (performs 25% to 49% of task);
- 1247 1 Total Assist (TA) (performs less than 25% of task); or
- 1248 0 Activity does not occur.

1249 The EAW Basic Skills (with the Trainer using the ReWalk mode selector wrist band), assessed  
1250 after five sessions, are as follows:  
1251

- 1252 1. Standing up;
- 1253 2. Sitting down;
- 1254 3. Two-handed balance for 30 seconds;
- 1255 4. One-handed balance with the left arm, maintaining balance for 30 seconds;
- 1256 5. One-handed balance with the right arm, maintaining balance for 30 seconds;



- 1257 6. Perform a weight shift where crutch support is needed behind the participant, followed by
- 1258 a weight shift where crutch support is needed to either side, followed by a weight shift
- 1259 where crutch support is needed in front of the participant;
- 1260 7. Shift their center of mass so that their weight is on the right leg;
- 1261 8. Shift their center of mass so that their weight is on the left leg;
- 1262 9. Able to adjust their weight so that it is evenly distributed between both feet; and
- 1263 10. Able to take two consecutive steps on each leg.

1264  
1265 These skills are needed for progression to walking and are expected to be achieved by session five  
1266 or the participant will not be permitted to continue with further training. In our experience, most  
1267 participants learn these skills in one or two sessions, but those who took longer than five sessions  
1268 were likely not to achieve the needed skill set for the recommendation for home/community use  
1269 of the exoskeleton by 20 to 30 sessions. Once the participant is able to perform the one-handed  
1270 static balance for a minimum of 30 seconds, the standing up and sitting down tasks with a FIM  
1271 score of 5 (supervision), they will be taught to use the mode selector wrist band and asked to wear  
1272 it throughout the remaining training sessions. Participants who are screening failures due to an  
1273 inability to pass the five-session Basic Skills Test may be re-screened at a future time, provided  
1274 no new potentially eligible candidates are available. However, once a participant is randomized,  
1275 they may not be re-randomized at a later date.

## 1276 **F. EAW Walking Skill Progression**

1278  
1279 Each training session will have predetermined goals that will be communicated to the participant.  
1280 Initial goals will be to coordinate crutch timing with the end of swing phase, followed by practicing  
1281 appropriate weight shifting for walking. Once these basic concepts are learned and the participant  
1282 is stable when balancing with one crutch, then the use of the mode selector will be incorporated.  
1283 As a participant progresses, system parameters should be adjusted according to the SOP manual  
1284 for walking progression in order to obtain faster walking speeds.

1285  
1286 The initial computer settings will be the same for all participants as follows:

- 1287 1. Normal walking mode;
- 1288 2. Hip flexion of 18 degrees;
- 1289 3. Knee flexion of 39 degrees;
- 1290 4. Step time of 1200 ms;
- 1291 5. Delay between steps of 300 ms;
- 1292 6. Tilt angle of 9 degrees;

- 1293 7. Walking resistance of 7; and
- 1294 8. Standing resistance of 10.

1295 Settings are expected to change as the participant becomes more comfortable with using the  
1296 exoskeleton. Hip flexion should be changed by 1 or 2 degrees in order to increase the step length  
1297 as a participant can perform longer weight shifts. Knee flexion should only be adjusted if the foot  
1298 catches during terminal stance and the initiation of the swing phase of the gait. The step time  
1299 should be decreased by 100-200 ms increments as the participant becomes more comfortable with  
1300 the frequency of weight shifting. Delay between steps should be lowered by 50-100 ms as  
1301 participants become better with weight shifting from one foot to the other during EAW. The tilt  
1302 angle should remain within a range of 7-10 degrees but could be decreased or increased slightly  
1303 depending on the participant's stability during standing. Walking resistance should be increased  
1304 by 1 if the system stops too easily, or the participant has more tone in the legs. Walking resistance  
1305 should be decreased when walking on smoother surfaces such as tile, or if the participant has  
1306 difficulty stopping the unit on command or when desired. Standing resistance should remain the  
1307 same.  
1308

### 1309 **G. EAW Companion Training**

1311 The FDA has designated this class of device to be used in conjunction with a trained walking  
1312 companion. The study calls for the use of a "walking companion", not a caregiver *per se*. The  
1313 companion can be anyone who has met the companion criteria (below) and has undergone formal  
1314 training with the participant on the use of the exoskeleton. Companions may be a family member,  
1315 friend, neighbor, volunteer, or other such individual. Therefore, the companions are not likely to  
1316 be the typical caregiver. That being appreciated, if a "caregiver" is available, eligible and  
1317 agreeable, they may be an EAW companion.  
1318

1319 Each participant will be required to have an EAW companion that will accompany them when the  
1320 participant is using the device. There may be multiple people trained to be the EAW companion.  
1321 An EAW companion will always need to be in close proximity to the participant when the system  
1322 is in use while in the home or community environments. The companion's job is to be there to  
1323 assist the participant with tasks such as navigating doors, bring them a chair, picking up items  
1324 needed from the floor, countertops, furniture, tabletops, etc., provide close guard or contact assist  
1325 when necessary, moving the device for donning or after donning, and to assist the participant with  
1326 device checking, battery charging and storage. If a participant does not have a suitable companion,  
1327 then they will not be eligible to participate in the study and are considered to be a screening failure.  
1328

1329 Training of more than one companion is strongly encouraged. The potential participant may have  
1330 up to three companions who share in the EAW training with the participant. All companions will  
1331 be provided a separate consenting process and will either sign an informed consent form and  
1332 HIPAA authorization or assent over the phone to be enrolled. If a companion withdraws during  
1333 the Intervention Phase and no other companion was trained or available, the participant must  
1334 complete additional companion(s) training. The new companion must pass the EAW Advanced  
1335 Skills Test with the participant to be given clearance to return to the home/community use  
1336 environment with the exoskeleton.

1337  
1338 The companion screening criteria are meant to be general guidelines, but it is ultimately in the  
1339 clinical judgment of the Site Physician to permit an acceptable companion.

1340  
1341 Companion Criteria:

- 1342 1. Male or female, age  $\geq 18$  years;
- 1343 2. Demonstrates understanding of the time commitment to be a companion (to be available  
1344 for approximately one-third of the training sessions, and walking at home or in the  
1345 community with the participant);
- 1346 3. The companion and the user are willing to receive training on how to assist the user with  
1347 donning/doffing the device, use of the controller, and performing the standing, sitting,  
1348 walking, and stopping skills while in the device;
- 1349 4. The companion and the user are able to understand how to operate, charge, and maintain  
1350 the device;
- 1351 5. Demonstrate proper care and storage of device; knowledge of the major components of  
1352 device (battery, waistpack, computer, right and left leg connection checks in computer  
1353 waistpack);
- 1354 6. Demonstrate understanding that the companion plus the user are examined as one team for  
1355 the exoskeleton skills assessments;
- 1356 7. The companion provides close supervision to minimal physical assistance to the participant  
1357 when s/he is in the exoskeleton and provides assistance with tasks that may be difficult for  
1358 the participant to perform while in the exoskeleton (i.e. opening manual doors and holding  
1359 elevator doors);
- 1360 8. The companion remains alert and on the lookout for potentially dangerous obstacles. If the  
1361 companion sees a situation which could be dangerous, s/he should feel comfortable  
1362 expressing their concerns to the user in the exoskeleton;

- 1363 9. The companion ensures that the exoskeleton is used with the crutches at all times and in  
1364 the manner in which both were taught;
- 1365 10. In the event of equipment malfunction, the companion will be able to assist the participant  
1366 down to a flat surface and be able to direct an additional individual in assisting them, if  
1367 necessary, for a low impact descent to the floor;
- 1368 11. In case of a medical emergency, the companion will be able to get help for the participant  
1369 including activating an emergency response and be able to direct an additional individual  
1370 in assisting them, if necessary; and
- 1371 12. The Site Physician and study team members must deem the companion physically able to  
1372 assist the participant with tasks outlined in the exoskeleton skills inventory (i.e. the  
1373 companion is able-bodied and is physically able to bend, stoop, squat, kneel, etc.).

1374  
1375 During the weekly contact with the participant, the study staff will inquire about the frequency of  
1376 walking and the availability of the companion. If the companion has not been able to walk with  
1377 the participant in a past week, the study staff will try to resolve the problems. Additional  
1378 companions will be suggested. Availability of the EAW companion(s) is an important  
1379 consideration and a close eye on this process will be necessary. Since these exoskeletal devices  
1380 are going to require walking companions as per the FDA, it will be important to know the  
1381 feasibility of our Veterans and military members with SCI to have viable walking companions for  
1382 use of an exoskeleton in the home/community environment. The number of eligible companions  
1383 and the actual amount of walking time that the companions are available for the participants during  
1384 the home-use phase can be determined in the Feasibility component of the study. If the companion  
1385 requirement proves to be an obstacle during the feasibility, it can be addressed with each case and  
1386 solutions can be made available for all study participants. If a companion is lost or withdraws from  
1387 the study, then the participant will be obligated to re-train another companion, or the participant  
1388 will be terminated from the study, an outcome that will be strenuously avoided. Of note, as a  
1389 consequence of this clinical trial, it will also be determined if identifying a companion is a major  
1390 obstacle to the use of the exoskeleton in our Veteran or military member population with SCI  
1391 because, as previously stated, these devices cannot be prescribed for home use without a  
1392 companion in attendance when this device is being used.

1393  
1394 **H. EAW Advanced Skills Test**

1395  
1396 The EAW Advanced Skills are in addition to the EAW Basic Skills. The EAW Advanced Skills  
1397 Test will be passed by the participant and their companion(s) prior to being sent home with an

1398 exoskeleton and as soon during the training course as the ReWalk Trainers and the participants  
1399 (with their companions) feel they can achieve the skills (at a minimum of 20 sessions). However,  
1400 if by 30 sessions the participants are unable to achieve these skills, they will not be sent home with  
1401 the device and will be treated as a study “failure”. Participants (with their companions) will need  
1402 to demonstrate the following skills according to the SOP manual:  
1403

- 1404 • Transfer into and out of the 1434
- 1405 exoskeleton; 1435
- 1406 • Don and doff the device with all the 1436
- 1407 straps and any additional padding 1437
- 1408 provided by the Trainer in the 1438
- 1409 correct places; 1439
- 1410 • Standing balance using both 1440
- 1411 crutches for a minimum of one 1441
- 1412 minute, showing good vertical 1442
- 1413 position; 1443
- 1414 • Standing balance with one arm for 1444
- 1415 30 seconds with the ability to reach 1445
- 1416 for the remote wrist band 1446
- 1417 communicator; 1447
- 1418 • Perform sit-to-stand and stand-to-sit 1448
- 1419 • Demonstrate full understanding of 1449
- 1420 the sit, stand, walk, and manual 1450
- 1421 mode functions of the remote 1451
- 1422 communicator; 1452
- 1423 • Perform a 10 meter walk test 1453
- 1424 without any stops 5 times at a speed 1454
- 1425 greater than 0.40 m/s (10m EAW in 1455
- 1426  $\leq 25$  seconds); 1456
- 1427 • EAW  $\geq 110$  meters in a 6-minute 1457
- 1428 walk test; 1458
- 1429 • EAW 10m on asphalt in  $\leq 25$  1459
- 1430 seconds; 1460
- 1431 • EAW timed-up-and-go (TUG) in 1461
- 1432  $\leq 90$  seconds; 1462
- 1433
- EAW  $\geq 20$ m over surfaces such as 1463
- tile, carpet, grass, and concrete in 1464
- $\leq 60$  seconds; 1465
- EAW up and down a ramp that 1466
- meets or exceeds Americans with 1467
- Disabilities Act (ADA) 1468
- specifications; 1469
- EAW while talking and answering 1470
- questions; 1471
- EAW in a noisy environment; 1472
- Reach for and remove an object 1473
- from an overhead cabinet to a 1474
- countertop level; 1475
- Turn 180 degree while EAW; 1476
- EAW through a door threshold; 1477
- EAW to a wall, turn and lean (“wall 1478
- rest”); 1479
- Explain purpose of the “graceful 1480
- collapse” function in case it of 1481
- emergency; 1482
- Demonstrate with companion the 1483
- graceful collapse function; 1484
- Demonstrate ability to check skin 1485
- integrity; 1486
- Demonstrate knowledge equipment 1487
- components; and 1488
- Able to charge the system at the end 1489
- of the day 1490

1462 **I. Weekly EAW Activity Log**

1463  
1464 ReWalk Trainers will be required to follow-up with each participant on a weekly basis. There will  
1465 be a standard list of questions as per the SOP manual to ask in order to ensure the system is fully  
1466 functional. If there have been any adverse events, or if the participant has any questions, s/he will  
1467 be informed to contact a member of the site’s study team. The participant will be required to  
1468 complete a weekly EAW Activity Log of the location of where the device was used and for how  
1469 long.

1470  
1471 Intervention Group: Training for the Intervention group will consist of 25±5 sessions of EAW  
1472 training followed by an EAW Advanced Skills Test that will determine the eligibility of the  
1473 participant to take the device home. Training will take place at the VA hospitals, in the CBOCs  
1474 under the same FWA as the sites, or in the participant’s home/community. Participants in the  
1475 Intervention arm will take the device home to use. During the training and home/community use  
1476 components of the study, the built-in step counter on the device will record the weekly total number  
1477 of steps taken. The EAW Activity Log will be completed by each participant on a weekly basis to  
1478 record the location, duration and frequency of device use. The Trainers will follow up weekly with  
1479 the participants for completion of this task.

1480  
1481 Control Group: In order to provide a similar level of attention to the Control group during the  
1482 Orientation/Training phase, the Control group will receive interviews to identify types of physical  
1483 activities in which they usually participate. Control participants will be instructed to complete the  
1484 Usual Activity Log on a weekly basis during the Orientation/Training course and during the four-  
1485 month Intervention phase. Weekly contact by the study team will be provided to the Control group  
1486 during the Orientation and Intervention phases, in person, over the phone, or through secure  
1487 messaging using My HealtheVet.

1488 **IX. OUTCOME MEASUREMENTS**

1489  
1490 The frequency and specific time points of each of the outcome measurements can be found in the  
1491 “Training and Testing Schedules” (Table 6).

1492  
1493 The two primary, major secondary and secondary outcomes are measured at baseline, post  
1494 Orientation/Training phase, post 2-month Intervention phase, and post 4-month Intervention  
1495 phase. The main comparison for the two primary and major secondary outcomes is the change in  
1496

1497 the outcome measures from baseline to post 4-month Intervention phase.

1498  
1499 **A. Primary Outcomes**

- 1500  
1501 1. Mental Health Component Summary (MCS) of the Veterans Rand-36 (VR-36) for Vitality,  
1502 Social Functioning, Role-Emotional, and Mental Health.  
1503 2. The sum T-score for the SCI-QOL Physical Medical Health domain (three item banks of  
1504 Bladder Management Difficulties, Bowel Management Difficulties, and Pain Interference).

1505  
1506 **B. Major Secondary Outcome**

- 1507  
1508 1. Total body fat mass (by DXA scan) (results will be blinded)

1509  
1510 **C. Secondary Outcomes**

- 1511 1. Global Impression of Change Scale (Participant- and Companion-rated);  
1512 2. PROMIS Sleep Disturbance T score;  
1513 3. Assessment of bowel function for:  
1514 a. Bowel evacuation (BE) time per episode in the past week,  
1515 b. Frequency of BE episodes,  
1516 c. Number of self-reported “natural” bowel movements in the past week,  
1517 d. Frequency of digit stimulation in the past week,  
1518 e. Stool consistency by the Bristol Stool Scale in the past week, and  
1519 f. Frequency of enema use and amount of laxatives and/or stool softener used in the  
1520 past month, and  
1521 g. Frequency of bowel incontinence/accidents in the past month;  
1522 4. SCI-QOL Physical-Medical Health for bladder complications (scale) and pain behavior  
1523 (scale);  
1524 5. SCI-QOL Emotional Health for positive affect and well-being, depression, anxiety, stigma,  
1525 resilience, grief-loss, self-evaluation, and trauma;  
1526 6. SCI-QOL Social Participation for ability to participate in social roles and activities,  
1527 satisfaction with social roles and activities, and independence;  
1528 7. SCI Functional Index (SCI-FI) for Physical Function for basic mobility, ambulation, fine  
1529 motor, self-care, wheelchair mobility, and assistive technologies;  
1530 8. Abdominal fat mass by DXA scan (this is acquired as part of the total body scan);  
1531



- 1532 9. Lipid profile analysis for HDL-c, LDL-C, TG, and TC will be shipped to the Chair's Office  
1533 for batch analysis by the JJPVAMC laboratory (results will be blinded); and  
1534 10. FPG and FPI for HOMA-IR calculation. FPG and FPI will be shipped to the Chair's Office  
1535 for batch analysis by their Core research laboratory.

1536 **D. Additional Assessments**  
1537

- 1538 1. EAW Basic Skills Test will be performed:  
1539 a. During the five-session basic EAW Training (both groups),  
1540 b. Post Training phase (Intervention group only), and  
1541 c. Post 4-month Intervention phase (Intervention group only);  
1542 2. EAW Advanced Skills Test performed:  
1543 a. Post Training phase (Intervention group only) and  
1544 b. Post 4-month Intervention Phase (Intervention group only).  
1545

1546 **E. Quality Control (non-outcome) Measurements**  
1547

- 1548 1. Weekly SOC activities (Usual Activity Log) will be recorded for wheelchair activities and  
1549 other, non-wheelchair activities (e.g., standing frame, swimming, or other non-wheelchair  
1550 activities). This is measured weekly in both groups.  
1551 2. In the Intervention group only;  
1552 a. Weekly EAW Activity Log in the Intervention group only,  
1553 b. Weekly number of steps taken recorded on the step counter, and  
1554 c. Walk tests and mobility assessments are recorded during each session once the  
1555 participant is able to perform them and for the duration of the Training phase for  
1556 the:  
1557 i. 10 meter walk test for time (10mWT),  
1558 ii. 6 minute walk test for distance (6minWT), and  
1559 iii. Timed-up-and go (TUG).  
1560 d. Walk tests and mobility assessments are recorded at months 2 and 4 during the  
1561 Intervention phase as an outpatient visit.  
1562 3. Exit survey: participants and companions will be asked questions about their satisfaction  
1563 with the study overall, and specifically about the device and training.  
1564 a. Previously randomized participants and their companions will be called to complete  
1565 the "Exit Survey".  
1566

1567 **F. Methods for Obtaining Outcome Measures Data**

1568  
1569 The Site ReWalk Trainers and Assistant ReWalk Trainers will perform the mobility skills and  
1570 walking tests and be responsible for recording the EAW data. Exoskeletal-assisted mobility  
1571 walking test assessments are measured in distance and/or time. Other mobility skills such as  
1572 arresting gait on command, maneuvering to a wall rest, navigating doors, etc., will be scored one  
1573 session per week as “able” or “unable” to perform the task; in addition, the level of assistance  
1574 needed to complete the task will be recorded with each assessment.

1575  
1576 The Site Coordinator will be responsible for administering the QOL outcome assessments (VR-  
1577 36, SCI-QOL, Global Impression of Change Scale (Participant- and Companion-rated), PROMIS  
1578 Sleep Disturbance, SCI-FI, and bowel function surveys) through in-person or phone interviews.  
1579 The Site Coordinators will record all answers on the fixed forms. The site Trainers may assist as  
1580 back-up QOL assessors only if necessary. In order to have continuity of assessment, the Site  
1581 Coordinators will administer the surveys at all of the time points. Each SCI-QOL, PROMIS Sleep  
1582 Disturbance and SCI-FI survey is reported as a T-score (mean=50, SD=10). The VR-36 is in a  
1583 fixed form and administered sequentially.

1584  
1585 The Site Coordinator will be responsible for administering the Global Impression of Change Scale.  
1586 This scale is a self-assessment completed by the participant (and separately by the companion)  
1587 with questions about feeling better from “No change (or condition has become worse); Almost the  
1588 same (hardly any change at all); A little better (slightly noticeable, but has not made any real  
1589 difference); Somewhat better (the improvement is small, slightly noticeable difference);  
1590 Moderately better (the improvement is a noticeable change); Significantly better (a definite  
1591 improvement, a real and worthwhile difference) to Extremely better (a comprehensive  
1592 improvement that has made all the difference)”. Each question is scored from 1 to 7, with 1 being  
1593 no change or worse and 7 being the best change in improvement. The change reported on  
1594 participant’s self-assessment on the global scale will be examined with the change reported on the  
1595 SCI-QOL for correlation. The companion’s impression of the participant’s global change will be  
1596 used as a proxy validation of the participant’s self-assessment. Analysis of the mean change scores  
1597 for both tools would help to confirm the clinical relevance of the hypothesized 10% improvement  
1598 from baseline in the SCI-QOL as a clinically relevant improvement.

1599  
1600 The Site Coordinator will be responsible for administering the bowel function surveys and will  
1601 explain to each participant to select the response that best represents what is asked by the

1602 question. These set of questions ask about the participants views about their bowel function. The  
1603 Site Coordinator will ensure that each participant answers every question, by marking the answer  
1604 as indicated. If the participant is unsure about how to answer a question they will be instructed to  
1605 provide the best answer they can. The Site Investigator will be responsible for the history and  
1606 physical examination and administering the International Standards for Neurological  
1607 Classification of SCI (ISNCSCI) Examinations for level and completeness of SCI. A radiology  
1608 technician or designated DXA technician at each site will perform the DXA scans. The cost of  
1609 this service has been added to the budget.

#### 1610 **G. Schedule of Observations and Laboratory Tests**

1612 A detailed description of the schedule of tests is provided (Table 6). Five DXA Scans will be  
1613 performed over the course of the study, one for screening BMD and four for total body fat mass  
1614 (includes abdominal fat mass) measurements. Four fasting blood draws (15 ml each time) will be  
1615 performed over the course of the study for the lipid profile and FPG and FPI. Bilateral calcaneus  
1616 x-rays will be obtained during screening. Other data collection will be in the form of Case report  
1617 forms (CRFs), sequential fixed forms, and Microsoft Access database or potentially other  
1618 electronic databases behind the VA firewall. Data collection may also take place through secure  
1619 messaging using My HealtheVet.  
1620

#### 1621 **X. PERFORMANCE MEASURES AND STUDY MANAGEMENT**

1622 The primary performance measure for the sites is enrollment. Performance measures will be  
1623 established early in the start-up year by review of the prescreening and screening forms. Sites that  
1624 do not meet the goals of 100 participants prescreened and 60 participants screened will be notified  
1625 for consideration of probation. Across all study sites, 160 participants are to be randomized. Each  
1626 site is expected to randomize between 4 and 24 participants.  
1627  
1628

1629 The overall management plan is for the sites' study team (Site Investigator, Site ReWalk Trainer,  
1630 Site Assistant ReWalk Trainers, and Site Coordinator) at the participating medical centers to  
1631 conduct the daily activities of the study. The Chair's Office and the CSPCC at the Perry Point,  
1632 MD VAMC will provide leadership and guidance to the local sites as specifically described below.  
1633

1634 **A. CSPCC**

1635  
1636 The Perry Point Cooperative Studies Program Coordinating Center (CSPCC), located in Perry  
1637 Point, Maryland, will provide administrative, data processing and statistical support for the study.  
1638 Data forms will be submitted by the local site study team members to the CSPCC for processing.  
1639 The CSPCC will edit the data and create the study database. CSPCC staff will provide guidance  
1640 on completion of forms. All reports during the ongoing phases of the study and the final statistical  
1641 analyses will be the responsibility of the CSPCC. CSPCC staff will also monitor study progress  
1642 to ensure that the study is proceeding as scheduled. A CSPCC study team dedicated to this study  
1643 will be established. This team will be headed by the study biostatistician and will include a CSPCC  
1644 project manager, a statistical programmer, a database programmer and two computer assistants.

1645 **B. Office of the Chair**

1647  
1648 Ann M. Spungen, EdD, study Chair and William A. Bauman, MD, Co-Chair will provide  
1649 leadership for the study. The Chair's Office is located at the James J. Peters VAMC, Bronx, New  
1650 York. In order to facilitate organizing and coordinating this ten-site multi-center study, the Chairs  
1651 have elected not to include the Bronx VA as a study site. The Chair's Office personnel will be in  
1652 routine contact with the participating sites to ensure that the study is performed in accordance with  
1653 the protocol and that each local site team is able to meet the enrollment goals and follow-up  
1654 activities on schedule. The Chair and Co-Chair will preside over all meetings and will represent  
1655 the study, along with the study biostatistician at any meetings of outside review committees. The  
1656 Chair's Office will be funded with a full-time National Study Coordinator (1.0 FTE), a Co-  
1657 National Coordinator (1.0 FTE), a Staff Assistant (1.0 FTE) and a part-time iDXA Analysis  
1658 Technician. Dr. Spungen will be responsible for all study executive decisions. She will serve as  
1659 the Chair of the CS #2003 Executive Committee. Dr. Bauman, Co-Chair, will provide medical  
1660 advice and direction for the National Coordinators and administrative staff as needed. Dr. Spungen  
1661 will be a resource for protocol details and compliance issues. She will serve as a liaison with other  
1662 study personnel for the Chair's Office. Dr. Spungen is a member of both the Executive and  
1663 Planning Committees.

1664  
1665 Overall, the National Study Coordinators are responsible for maintaining enthusiasm, quality  
1666 standards across the sites, discussing problems, problem solving, and identifying any  
1667 procedural/definitional modifications that might be required. The CS #2003 National Study  
1668 Coordinators will be responsible for overseeing all study activities in the Chair's Office on a day-

1669 to-day operational basis. In addition to the specific job responsibilities outlined in the “Description  
1670 of Responsibilities” section of this submission, the National Coordinator and Co-National  
1671 Coordinator will:

- 1672 1) Assist the Chairpersons in coordinating and administering all aspects of the study;
- 1673 2) Assist the Chairpersons in monitoring the progress of the study;
- 1674 3) Maintain close contact with the participating Site Investigators, Site ReWalk Trainers, and  
1675 Site Coordinators to assist them in any procedural details of the study;
- 1676 4) Maintain close contact with the study’s supervisory committees; and
- 1677 5) Work collaboratively with the Perry Point CSP Coordinating Center team to organize and  
1678 plan periodic meetings of participating Site Investigators and other study team members  
1679 for the purposes of reporting progress of the study.  
1680

## 1681 **XI. SAFETY MONITORING**

1682

1683 Timely and complete reporting of safety information assists study management in identifying any  
1684 untoward medical occurrence, thereby allowing: a) protection of safety of study participants, b) a  
1685 greater understanding of the overall safety profile of the study treatments and therapeutic  
1686 modalities, c) improvements in study design or procedures, and d) compliance with regulatory  
1687 requirements. The Site Investigator will be responsible for reviewing the accuracy and  
1688 completeness of all reported events, compliance with VA CIRB policies for reporting adverse  
1689 events (AE), serious adverse events (SAE), Unanticipated Adverse Device Effects (UADE), and  
1690 closely monitoring research participants at each study visit for any new SAEs.  
1691

1692 A number of groups will be charged with monitoring the study. These groups include the Study  
1693 Group, the Executive Committee, the Data Monitoring Committee (DMC), , the VA Central  
1694 Institutional Review Board (CIRB), the CSPCC Human Rights Committee and the Cooperative  
1695 Studies Scientific Evaluation Committee (CSSEC). In addition, the CSP Site Monitoring Auditing  
1696 and Resource Team (SMART) will routinely visit the participating centers. This monitoring will  
1697 not preclude the yearly monitoring that the local R&D Committee and CIRB must also perform.  
1698

1699 **A.** The **Study Group** consists of all participating Site Investigators, Site ReWalk Trainers and  
1700 Site Coordinators, as well as staff from the Chair’s Office, CSPCC, and CSPCRPCC. It meets  
1701 prior to the start of participant intake and annually to discuss the plans/progress of the study, as  
1702

1703 well as to identify any problems encountered during the conduct of the trial. No outcome data are  
1704 presented to this group.

1705  
1706 **B.** The **Executive Committee** is the management and decision-making body for the  
1707 operational aspects of the study. Chaired by Dr. Spungen, the committee consists of the Chair and  
1708 Co-Chair, the study biostatistician, the Adverse Event Specialist, a minimum of three Site  
1709 Investigators, and outside consultants, if necessary. This committee monitors the performance of  
1710 participating medical centers and quality of data collected. The Executive Committee formulates  
1711 plans for publications and oversees the publication and presentation of all data from the study.  
1712 Permission from this committee must be granted before any study data may be used for  
1713 presentation or publication. This committee typically meets on the same schedule as the Study  
1714 Group. This group also does not receive outcome data during the course of the study.

1715  
1716 **C.** The **Data Monitoring Committee (DMC)** is a group of outside experts in the area of spinal  
1717 cord injury, clinical trials and biostatistics that reviews the progress of the study and monitors  
1718 participant enrollment, outcomes, adverse events, and other issues related to patient safety. The  
1719 DMC makes recommendations to the Director of the Cooperative Studies Program (CSP) as to  
1720 whether the study should continue or be modified or stopped. The DMC can consider patient  
1721 safety or other circumstances as grounds for early termination, including either compelling internal  
1722 or external evidence of treatment differences or lack of feasibility of addressing the study  
1723 hypotheses (e.g., poor patient intake, poor adherence to the protocol). The DMC will meet  
1724 annually to review data reports prepared at the Perry Point CSPCC. At the six-month interval  
1725 between the annual meetings, the DMC will receive another data report for review without a  
1726 meeting. Any member of the DMC can ask for a meeting of the group if s/he feels that it is  
1727 necessary, based upon the data.

1728  
1729 **D.** The **VA Central IRB (CIRB)** will be the study's primary IRB and the IRB of record for  
1730 the study. It will be responsible for the initial and continuing IRB reviews of the study. The CIRB  
1731 must review and approve amendments (changes to inclusion/exclusion criteria, protocols,  
1732 informed consents, etc), deviations, and review reports about adverse events and problems,  
1733 complaints, terminations, etc.. The CIRB approves the original informed consent template and  
1734 any requested changes to the informed consent forms. The CSPCC Human Rights Committee  
1735 (HRC) may be asked to convene if there is any serious adverse event requiring its attention.

1736 **E. Definitions of Adverse Event (AE), Serious Adverse Event (SAE), and Unanticipated**  
1737 **Adverse Device Effect (UADE)**

1738  
1739 An Adverse Event (AE) is defined by the International Conference on Harmonization (ICH) for  
1740 Clinical Safety Data Management (ICH-E2A) as “any untoward medical occurrence in a clinical  
1741 investigation participant that is subjected to one of the study treatments that does not necessarily  
1742 have to have a causal relationship with the treatments. An AE, therefore, can be any unfavorable  
1743 or unintended sign (including an abnormal laboratory finding), symptom, or disease temporally  
1744 associated with the study interventions.” In this study, all AEs will be collected by the Sponsor.  
1745 The reporting period for AEs begins when the participant signs the informed consent form and  
1746 continues until the participant’s completion or early termination of participation or the end of the  
1747 study.

1748  
1749 A Serious Adverse Event (SAE) is defined by the ICH for Clinical Safety Data Management and  
1750 CSP Global SOP 3.6.2, as any untoward medical occurrence that: results in death, is life  
1751 threatening, requires inpatient hospitalization or prolongation of existing hospitalization, results in  
1752 persistent or significant disability or incapacity, a congenital anomaly/birth defect, or any other  
1753 condition that, based upon medical judgment, may jeopardize the subject and require medical,  
1754 surgical, behavioral, social or other intervention to prevent such an outcome. Participants will be  
1755 monitored for SAEs at each study visit. All SAEs will be reported on an SAE Form, regardless of  
1756 relationship to the intervention. Active monitoring for SAEs begins at the time the Informed  
1757 Consent Form is signed and continues until the earlier of the 30 days after the participant’s  
1758 completion or early termination of study participation or the end of the study. All SAEs require  
1759 prompt reporting to the CSP Clinical Research Pharmacy Coordinating Center (CSPCRPC)  
1760 within 72 hours of the Site Investigator becoming aware of the event. All **unresolved** SAEs must  
1761 be followed up at least every 30 days until resolved or when no further change is expected (i.e.,  
1762 event is ongoing recovering/resolving or not recovered/not resolved. No changes to the event will  
1763 occur in the future.) All SAEs are followed until no changes are expected or the study is  
1764 discontinued.

1765  
1766 An unanticipated adverse device effect (UADE) is defined in 21 CFR 812.3(s) as any serious  
1767 adverse effect on health or safety or any life-threatening problem or death caused by, or associated  
1768 with, a device, if that effect, problem, or death was not previously identified in nature, severity, or  
1769 degree of incidence in the investigational plan or application (including a supplementary plan or

1770 application), or any other unanticipated serious problem associated with a device that relates to the  
1771 rights, safety, or welfare of subjects.

1772 Starting with each site, at the local level, the site study team members will be responsible for  
1773 recording adverse and serious adverse events, as well as unanticipated adverse device effects and  
1774 submitting them to the appropriate authorities in the time frames listed below.  
1775

1776 **F. Serious Adverse Event (SAE) Reporting**  
1777

1778 Any Serious Adverse Event (SAE) is reported on both the SAE and AE case report forms. The  
1779 Site Investigator will be responsible for reporting a SAE, ascertaining the participant's study  
1780 identification number, date of event, and will determine if the SAE is related, possibly related or  
1781 not related to the protocol. A description of any outcome or response to the SAE will also be  
1782 included in this report. A description of any outcome or response to the SAE will also be  
1783 included in this report. As more information about a SAE becomes available, updates to this initial  
1784 report must be made on the SAE Follow-Up form. It is the responsibility of each Site Investigator  
1785 to report SAEs from their site to the CIRB within the timelines they require. SAE data are  
1786 tabulated by the CSPCC at Perry Point, MD and the CSPCRPCC at Albuquerque, NM, and  
1787 summarized and in the report to the DMC. ReWalk Robotics, Inc. will be provided a summary of  
1788 SAEs annually.

1789 **G. Adverse Event (AE) and Unanticipated Adverse Device Effect (UADE) Reporting**  
1790

1791 Any mild (awareness of symptom, but easily tolerated), moderate (discomfort enough to cause  
1792 interference with usual activity) or severe (incapacitating with inability to work or do usual  
1793 activity) AE must be reported on the AE case report form. Any AE which also meets the criteria  
1794 for a SAE must also be reported on the SAE form. It is the responsibility of each Site Investigator  
1795 to report AEs from their site annually to the CIRB. Participants will be monitored at a minimum  
1796 of one time per week for AEs and recorded on the appropriate form should any occur. AE data  
1797 are tabulated by the CSPCC at Perry Point, MD and the CSPCRPCC at Albuquerque, NM and  
1798 summarized in the report to the DMC.  
1799

1800 UADEs must be reported by the clinical investigator to the sponsor and the CIRB, Investigators are  
1801 required to submit a report of a UADE to the sponsor and the reviewing IRB as soon as possible, but  
1802 in no event later than 10 working days to the sponsor and no later than 5 days to the CIRB after the  
1803 investigator first learns of the event. This reporting will be to the CSP Clinical Research Pharmacy  
1804



1805 Coordinating Center on an AE or SAE form, as appropriate, and to the CIRB on the relevant IRB  
1806 form. The reporting period for UADEs begins when the participant signs the informed consent form  
1807 and continues until the participant's completion or early termination of participation or the end of the  
1808 study

1809  
1810 As part of the orientation and training for each participant on the device, the expected occurrence  
1811 of routine AEs will be described to the participants, including that they may experience skin  
1812 abrasions, and hand, shoulder or any other joint discomfort. During the five-session Basic Training  
1813 and in the Screening Phase and the Orientation/Training Phase, participants will be asked during  
1814 each session if they are experiencing any discomfort or pain. Hand or shoulder discomfort, if they  
1815 occur, are expected to occur early on in training when the participant is learning to use the device.  
1816 Participants who report any pain or other medical problem will be referred to the Site physician.  
1817 The Site physician will be responsible for taking the appropriate course of action for the AE or  
1818 SAE. The study staff will be responsible for recording the occurrence of AEs or SAEs  
1819 appropriately, as they occur. Additionally, the SMART unit will be charged with monitoring the  
1820 informed consent documentations, source documents, AE and SAE forms, as well as assessing if  
1821 the Site study team is carrying out the study correctly.

1822  
1823 The Site Investigator will be responsible for monitoring these events on a regular basis at his/her  
1824 site. The immediate and ongoing safety review of study data to monitor for evidence of adverse  
1825 events will be conducted by the Cooperative Studies Program Clinical Research Pharmacy  
1826 Coordinating Center (CSPCRPCC) in Albuquerque, NM. The Data Monitoring Committee (DMC)  
1827 will review AEs and SAEs on a regular basis.

## 1828 **H. Participant Safety Stopping Rules**

1830  
1831 The Site Physician will make the decision for participants who have a safety or medical concern  
1832 such as: skin breakdown, edema, joint discomfort, muscle soreness, extreme fatigue, or any other  
1833 medical condition as to whether they are to be continued as is, continued with modifications to the  
1834 equipment, temporarily discontinued, or withdrawn from the study. Re-entry to the Training or  
1835 Intervention phases of the study will be based on the Site Physician's medical clearance and the  
1836 participant's safety to begin again.

1837 **I. Site Participation Stopping Rules**

1838  
1839 Each site must enroll at least 8 participants in the first year of enrollment. Sites that do not meet  
1840 this enrollment goal will be considered for probation. Rapid improvement is expected to avoid  
1841 termination from the study. Sites that continue to fail to meet their recruitment goals will be  
1842 discontinued and replaced with another site, if time permits during the study. The Chair’s Office  
1843 and the CSPCC will work with any site that is below recruitment goals to assist in overcoming  
1844 obstacles which may have contributed to their falling behind, thus allowing them the opportunity  
1845 to catch up. If this is not feasible, then resources will be shifted to either allow the other sites to  
1846 recruit more participants, or phase out one site and start another.

1847  
1848 Pre-screening and screening logs will be closely monitored by CSPCC and the Chair’s Office.  
1849 Study sites that have not met their recruitment goals will be closely reviewed for reasons why. An  
1850 indicator for unmet enrollment, which can be assessed early in the start of the study, is lack of  
1851 prescreened and screened potential candidates. Sites will be expected to prescreen 100 and screen  
1852 60 potential participants over the years of study enrollment. Viewing the sites’ prescreening and  
1853 screening histories early can help to identify sites that are not performing as expected. The  
1854 feasibility component will be used to formally assess the enrollment rates for the first six sites.

1855 **J. Efficacy or Futility Criteria for Study Termination**

1856  
1857  
1858 The DMC will be responsible for review of the SAEs and AEs for each site and across the study  
1859 as a whole. The DMC will make all decisions for stopping the study based on safety concerns,  
1860 should any present. Early analyses before the study is completed may result in stopping of the  
1861 study. For example, if it is statistically demonstrated that the results for either efficacy or futility  
1862 to date could not be changed with further enrollment, the study may be stopped. When repeated  
1863 significance tests are performed on accumulating data as part of a routine monitoring function, the  
1864 overall type-I error rate is inflated and the probability of a false positive finding is also increased.  
1865 A number of methods have been developed to provide guidance on study termination rules based  
1866 on multiple looks at the primary outcome measures for the review committees while keeping the  
1867 overall type-I error rate maintained at 5%. For this study, the O’Brien-Fleming method for alpha  
1868 spending and rejection/acceptance boundaries will be suggested for Type-I error rate control (see  
1869 Statistical Analysis Plan (SAP – Section XIII) for further details) but the DMC will make the final  
1870 decision on the type of stopping rule that will be used for the study.

1871 **XII. QUALITY ASSURANCE PROCEDURES**

1872  
1873 Centralized and on-site reviews and monitoring of clinical site practices will be conducted at  
1874 several levels. The National Coordinator will visit each site two times per year during the  
1875 enrollment years to monitor the EAW Training, patient safety, and compliance with the study  
1876 protocol. The Co-National Coordinator will visit each site one time annually during the enrollment  
1877 years to monitor standardization of the QOL assessments and protocol compliance. Participant’s  
1878 medical records will be made available to the CSP Site visitors as a requirement for participation  
1879 in this study.

1880  
1881 This trial will be conducted in compliance with Good Clinical Practice (GCP) regulations. The  
1882 intent of these regulations is to safeguard participants’ welfare and assure the validity of data  
1883 resulting from the clinical research. The VA Cooperative Studies Program will assist local site  
1884 Investigators in complying with GCP requirements through its Site Monitoring, Auditing and  
1885 Resource Team (SMART) based in Albuquerque, NM. SMART serves as the Quality Assurance  
1886 arm of CSP for GCP compliance. SMART will provide training, manuals and materials to assist  
1887 study personnel in organizing study files and will be available throughout the trial to advise and  
1888 assist Site Investigators regarding GCP issues.

1889  
1890 **A. Summary of Monitoring and Auditing Plans**

1891  
1892 **1. Monitoring Visits**

- 1893 • One routine monitoring visit per site  
1894 • Additional monitoring visits may be conducted as deemed necessary by study leadership  
1895 or SMART.

1896 **2. Audits**

- 1897 • Routine audits – independent site visits to one or more sites per year as determined by  
1898 SMART.  
1899 • For-Cause audits –independent audit of a site as requested by study leadership or CSP  
1900 Central Office.  
1901 • Audits may be scheduled or unannounced.

1902 **XIII. STATISTICAL ANALYSIS PLAN (SAP)**

1903  
1904 **A. Introduction**

1905  
1906 There are two primary outcome measures in this study: the first is the score on the Mental  
1907 Component Summary of the Veterans Rand-36 (MCS/VR-36) and the second is the sum T-score  
1908 for the SCI-QOL Physical Medical Health domain (three item banks for bladder management  
1909 difficulties, bowel management difficulties and pain interference). The primary study hypotheses  
1910 are: 1) 33% of the intervention group (EAW+SOC) compared with 10% of the control group  
1911 (SOC) will demonstrate a clinically relevant change (improvement) of  $\geq 4.0$  points in the  
1912 MCS/VR-36, for greater vitality and social functioning, and improved role-emotional and mental  
1913 health, from baseline to the end of the intervention phase, and 2) 42% of the intervention group  
1914 compared with 10% of the control group will demonstrate a clinically significant improvement  
1915 from baseline of  $\geq 10\%$  in the sum T score, indicating improvement in patient reported outcomes  
1916 for SCI-QOL bladder management, bowel management and pain interference.

1917  
1918 A major secondary objective of the study is to demonstrate that participants who use the  
1919 exoskeleton in addition to SOC (EAW+SOC) will have at least a 1.0 kg loss in total body fat mass  
1920 by the end of the four-month intervention compared to those who receive SOC only. Other  
1921 secondary objectives are to demonstrate that participants in the EAW+SOC group will have greater  
1922 net improvements than participants in the SOC only group in the following outcomes: 1) Global  
1923 Impression of Change (participant- and companion-rated), 2) disturbed sleep as measured by the  
1924 T-score of the Patient Reported Outcomes Measurement Information System (PROMIS) Sleep  
1925 Disturbance, 3) self-reported methods and measures of bowel function, 4) sum T scores of the  
1926 SCI Functional Index (SCI-FI) physical function short forms, 5) sum T scores of the SCI-QOL  
1927 Emotional domain, 6) sum T scores of the SCI-QOL Social Participation domain, 7) lipid profile  
1928 for high density lipoprotein cholesterol (HDL-c), low density lipoprotein cholesterol (LDL-c),  
1929 triglycerides (TG), and total cholesterol (TC), and 8) fasting plasma glucose (FPG) and insulin  
1930 (FPI) levels for calculation of Homeostasis Model of Assessment-Insulin Resistance (HOMA-IR).

1931 **B. Sample Size**

1932  
1933 Using preliminary data generated from the Exoskeletal-assisted Walking Program at the James J.  
1934 Peters VA Medical Center, three separate power calculations were performed, one for each of the  
1935 primary outcome measures, the MCS/VR-36 and the sum t-score of the SCI-QOL bladder, bowel  
1936 and pain item banks, and one for the major secondary measure, total body fat mass. The sample

1937 size estimates are based on the preliminary data from these three outcome measures as a proportion  
1938 of participants who achieved a clinically significant change score (MCS/VR-36 and Total Body  
1939 Fat Mass) or a clinically significant percent change (SCI-QOL PMH).

1940  
1941 Sample size/power calculation for the Primary Outcome (1) MCS/VR-36: A minimally important  
1942 difference for the MCS/VR-36 is 4.0. It is hypothesized that 33% of the Intervention group and  
1943 10% of the Control group will achieve a 4.0 or greater change on the MCS/VR-36 (Table 7).

1944  
1945 Sample size/power calculation for the Primary Outcome (2) SCI-QOL for Bladder, Bowel and  
1946 Pain: An improvement of 10% in the sum T-score of the patient-reported outcomes from the  
1947 combined SCI-QOL item banks for bladder management difficulties, bowel management  
1948 difficulties and pain interference is clinically significant. As such, it is hypothesized that 42% of  
1949 the Intervention group compared with 10% of the Control group will demonstrate a clinically  
1950 significant change of 10% improvement from baseline to the end of the intervention phase on the  
1951 sum T-score in the combined SCI-QOL item banks for bladder management difficulties, bowel  
1952 management difficulties and pain interference. (Table 7).

1953  
1954 Sample size/power calculation for the Major Secondary Outcome for Total Body Fat Mass:  
1955 Patients with a new SCI can be expected to gain an average of  $6.0 \pm 8.9$  kg of fat mass in the first 14  
1956 months after injury (manuscript in preparation from our Center). This gain in fat mass appears to  
1957 continue throughout the duration of their life after SCI. As demonstrated in the preliminary data,  
1958 an intervention that supports a 1.0 kg (2.2 lb.) loss of fat mass is a substantial amount of fat mass  
1959 to lose in three months for a person with SCI. Very few interventions have demonstrated changes  
1960 in body composition of this magnitude in the SCI population. It is expected that 35% of the  
1961 Intervention group compared with 10% of the Control group will maintain total body fat mass loss  
1962 during the home/community use phase of the intervention.

1963  
1964 Assuming the proportion in the control group achieving a clinically meaningful change to be 10%  
1965 (or 0.100) for all three outcome measures, and estimating the attrition rate at 15%, the sample sizes  
1966 range from a low of 71 per group (95% power) for the SCI-QOL PMH outcome to a high of 79  
1967 per group (80% power) for the MCS/VR-36 group. As a note about Table 7, to adjust for multiple  
1968 outcome measures, a significance level of 0.025 was used in the sample size calculations for the  
1969 co-primaries (MCS/VR-36 and SCI-QOL) and also for the major secondary outcome measure  
1970 (Total Body Fat Mass). Based on the sample size and power calculations in Table 7, the study will  
1971 enroll a total sample size of 160 participants, 80 per group.

| <b>Table 7: Sample Size/Power Calculations</b>                                                 |                  |                      |                            |
|------------------------------------------------------------------------------------------------|------------------|----------------------|----------------------------|
| Two group continuity corrected $\chi^2$ test of equal proportions (odds ratio = 1) (equal n's) | <b>MCS/VR-36</b> | <b>SCI-QOL (PMH)</b> | <b>Total Body Fat Mass</b> |
| <b>Test significance level, <math>\alpha</math></b>                                            | 0.025            | 0.025                | 0.025                      |
| <b>1 or 2 sided test?</b>                                                                      | 2                | 2                    | 2                          |
| <b>Control proportion, <math>\pi_1</math></b>                                                  | 0.100            | 0.100                | 0.100                      |
| <b>Intervention proportion, <math>\pi_2</math></b>                                             | 0.333            | 0.420                | 0.350                      |
| <b>Odds ratio, <math>\psi = \pi_2(1 - \pi_1) / [\pi_1(1 - \pi_2)]</math></b>                   | 4.493            | 6.517                | 4.846                      |
| <b>Power (%)</b>                                                                               | 80               | 95                   | 85                         |
| <b>n per group</b>                                                                             | 67               | 60                   | 66                         |
| <b>n per group with 15% attrition</b>                                                          | 79               | 71                   | 78                         |

### C. Feasibility Phase

In order to confirm the hypothesized control proportion for the two primary and major secondary outcomes, to determine the feasibility of recruiting participants at each site, and to assess other operational aspects of the study, a feasibility phase has been built into this study. The planned duration of the feasibility phase of the study is one year. Six out of fifteen planned sites (including three sites that are designated CSP NODES) will be brought up in the first year.

During the feasibility phase, several site start-up activities and operational aspects of the study will be examined. These activities will include the hiring of site personnel (including classification of position descriptions, position announcements and recruitment), the processes for procuring and distributing the ReWalk and iDXA devices to the sites, the methods by which site staff are trained on the use of the devices and on data collection and management activities, the number of sessions needed for participants in the intervention group to pass the Advanced Skills Test, the practicality of Veterans or members of the military with SCI to find motivated and eligible walking companions, and attrition (drop-out) rates. The lessons learned during this phase will be implemented during activation of the remaining participating sites.

Recruitment rates at the six active sites will be closely monitored during this phase. The initial six sites are expected to enroll a total of 48 participants by the end of the first year. The actual recruitment experience of the six sites in the first year will be used to revise the projected recruitment rate for the remainder of the study and may lead to a lengthening or shortening of the total recruitment period, as appropriate.

Besides the verification of the assumed recruitment rate and other site start-up activities, the feasibility phase also provides an opportunity to assess the assumed success rates in the control (SOC) group. As stated above in section II, we have hypothesized that 10% (0.100) of the control

2000 group will have a clinically meaningful change in the outcome measures for sample size/power  
2001 calculations. Ten percent is thought to be a conservative estimate as there is no reason to expect  
2002 the control group to have clinically meaningful changes in quality of life measures or in total body  
2003 fat mass while continuing to receive SOC for their spinal cord injury. However, as a means of  
2004 verifying the control proportion of 10% (or 0.100), the proportion of participants considered  
2005 successful in the control group for all three outcomes and 95% confidence intervals for the  
2006 proportions will be reviewed upon the completion of the feasibility phase. Based on the extensive  
2007 experience with this population it is highly unlikely that the assumed success rates in the control  
2008 group (SOC) will be any higher than the assumed 10%.

2009  
2010 At the completion of the feasibility phase, the study will be moved to a continuation phase where  
2011 the remaining sites (9 remaining sites) will be activated, and the remaining participants will be  
2012 recruited.

#### 2013 **D. Baseline Comparability**

2014  
2015 Baseline comparability between the treatment groups will be evaluated with respect to such  
2016 variables as demographics (e.g., age, gender, and race) and baseline values of outcome measures  
2017 (MCS/VR-36, SCI-QOL, total body fat mass, etc.). Chi-square and analysis of variance  
2018 techniques, as appropriate, will be used to determine any differences in distribution of the variables  
2019 across the treatment groups. Any variable that appears to be different between the groups ( $p < 0.10$ )  
2020 will be considered as a potential covariate in statistical analyses.

#### 2021 **E. General Outcome Analysis Guidelines**

2022  
2023 All statistical tests will be 2-sided. The two primary and major secondary outcome measures will  
2024 be tested at a 0.025 level of significance. Because of the large number of secondary outcomes to  
2025 be analyzed, all other secondary outcomes will be tested at a significance level of 0.01 to maintain  
2026 control over Type I error. SAS 9.4 will be used to conduct all the statistical analyses. A variety of  
2027 analytic methods will be used for the primary endpoints, secondary endpoints and other analyses.

#### 2028 **F. Analysis of Primary and Major Secondary Outcome Measures**

2029  
2030 The primary analysis will be based on an intent-to-treat (ITT) model. All participants who are  
2031 randomized will be included for both groups, whether they are study completers (participants who  
2032 complete the study through the four-month intervention phase) or early terminators (drop-outs).  
2033 In order to test the hypotheses for the primary and major secondary outcome measures, each  
2034 randomized participant will be deemed a success or failure at attaining: 1)  $\geq 4.0$  point  
2035 improvement in the MCS of the VR-36, 2)  $\geq 10\%$  improvement in the SCI-QOL bladder  
2036 management difficulties, bowel management difficulties and pain interference sum T score, and  
2037  
2038  
2039

2040 3)  $\geq 1$  kg. total body fat mass loss. For each of the outcomes, the proportion of participants  
2041 successful at achieving a clinically significant improvement will be compared between the two  
2042 groups (Intervention vs. Control) using a chi-square analysis. These will constitute the primary  
2043 and major secondary efficacy analyses. Participants who drop out will be treated as failures. As  
2044 such, by design, there will be no missing data: participants either meet the outcome criteria  
2045 (successes), do not meet these criteria (failures) or they drop out (also failures).

## 2046 **G. Secondary Analyses**

2047 In addition to the primary analysis, several secondary analyses will be performed and are described  
2048 below.

- 2049 1. Analyses will be performed that include only those participants who complete the study  
2050 (excluding drop-outs):
  - 2051 a) Chi-square analyses of the primary and major secondary outcome measures  
2052 (proportion of successes) will be repeated for only those participants who complete  
2053 the 4-month intervention phase.
  - 2054 b) Analyses of the MCS/VR-36, SCI-QOL, total body fat mass loss, Global  
2055 Impression of Change and other secondary outcome measures will include  
2056 comparisons of the mean difference scores (change from baseline to the end of the  
2057 intervention phase) of these outcome variables using t-tests.
- 2058 2. Interim time points of data collection for all outcome variables have been incorporated into  
2059 the study design. These time points are: baseline, after training/orientation phase, two  
2060 months into the intervention phase, and then again after four months of the intervention  
2061 phase (primary and major secondary outcomes main time point). Secondary analyses of  
2062 the MCS/VR-36, SCI-QOL, total body fat mass loss, Global Impression of Change and  
2063 other secondary outcome measures will include comparisons of the mean difference scores  
2064 (change from baseline to the end of each time point) of these outcome variables using t-  
2065 tests. Other secondary analyses of outcome measures will be performed that use all data  
2066 available. For these continuous variables, repeated measures analysis of covariance will  
2067 be used to analyze them, with baseline scores, plus any variables determined from the  
2068 baseline comparisons, being used as covariates in the analyses. SAS MIXED and  
2069 GENMOD procedures, which allow for the use of incomplete data sets, will be used if it  
2070 can be safely assumed that missing data are missing at random. If this assumption is not  
2071 valid, a multiple imputation strategy of the missing responses will be implemented which  
2072 does not rely on the assumption that missing data occur at random. This will allow an  
2073 intent-to-treat approach for the statistical analyses, where complete cases are not required.  
2074  
2075  
2076  
2077  
2078



- 2079 3. An analysis to determine the characterization of the drop-outs will be performed by using  
2080 descriptive and correlation statistics. The reasons for drop-out and the number of  
2081 sessions/time points completed will be described. A correlation analysis will be performed  
2082 with the reasons for drop-out and the demographic variables and other potential variables  
2083 to identify characteristics of persons who drop out of the study.

2084 **H. Monitoring of Study by Study Group and Executive Committee**

2085  
2086 The Study Group (all of the Site Investigators) and Executive Committee will meet 6 to 9 months  
2087 after patient recruitment begins and at annual intervals thereafter until the end of the study. Three  
2088 weeks prior to these meetings and at 6-month intervals between the meetings, these groups will be  
2089 provided a report that will allow them to assess study progress. Since both groups are composed  
2090 of study participants, no outcome data will be provided in these reports. The information provided  
2091 will include data on:

- 2092 1. Screening, enrollment and retention  
2093 2. Patient background characteristics at entry  
2094 3. Data quality and protocol adherence.

2095  
2096 **1. Screening, Enrollment and Retention**

2097  
2098 During the pre-screening phase of the study, potential participants will be first contacted by the  
2099 Site Investigator through chart reviews, other physician referrals, pre-existing knowledge about  
2100 their patients, access to contact information in a VINCI database, physician referrals at other VA  
2101 hospitals, and/or through study flyers and invitation letters. Study flyers may also be given to  
2102 potential participants in the SCI Clinics, posted in local area hospitals, or distributed at local and  
2103 national SCI events. Study flyers may also be posted generally in areas where potential participants  
2104 may see the information (i.e. local chapters of Veterans Organizations, SCI sporting events) and  
2105 included in newsletters or journals with a focus on the SCI population. Eligible and interested  
2106 potential participants will be contacted by the Site ReWalk Trainers and/or Site Study Coordinators  
2107 for initiation of the consenting process and the screening and baseline evaluations. Any participant  
2108 who consents to the study and passes all screening and baseline evaluations is eligible to be  
2109 randomized into the study.

2110  
2111 The progress of patient accrual will be presented to the monitoring groups in two formats. Table  
2112 8 gives the first format, which presents, by site and month, the actual number of patients entered  
2113 into the study. This table will indicate if recruitment is improving or worsening over time at the  
2114 various sites.

2115  
2116

**Table 8. CS #2003 Number of Participants Entered Each Month by Site**

| Month          | Site 1 | Site2 | ... | Site 15 | Total |
|----------------|--------|-------|-----|---------|-------|
| September 2016 |        |       |     |         |       |
| October 2016   |        |       |     |         |       |
| November 2016  |        |       |     |         |       |
| September 2016 |        |       |     |         |       |
| .              |        |       |     |         |       |
| .              |        |       |     |         |       |
| .              |        |       |     |         |       |
| <b>Total</b>   |        |       |     |         |       |

2117  
2118  
2119  
2120  
2121  
2122

Intake data will also be plotted over time for the total number of participants recruited, as in Figure 9. An expected intake line is given for comparison purposes, assuming a staggered start of sites: 6 sites expected to enroll 48 participants in the first year of recruitment, 10 sites projected to enroll 80 participants during the second year of recruitment and 15 sites enrolling 32 participants during the third and fourth years of recruitment, for a total of 160 participants randomized.

2123  
2124  
2125  
2126  
2127  
2128  
2129  
2130  
2131  
2132  
2133  
2134  
2135  
2136  
2137  
2138  
2139  
2140

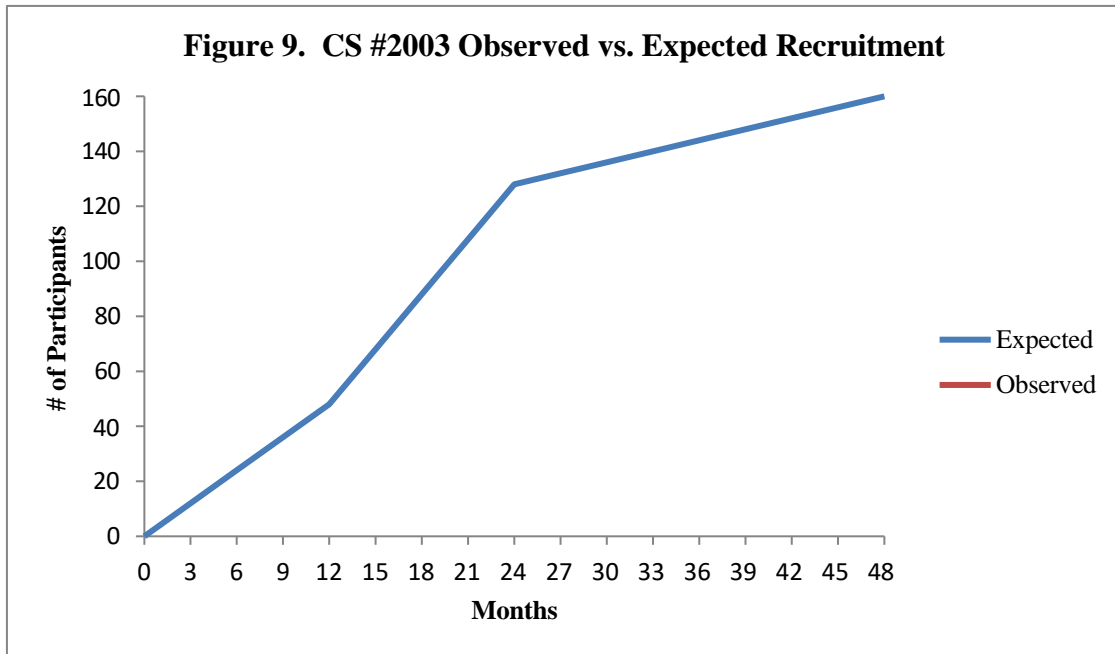

2141  
2142  
2143  
2144

The number of participants screened and the number of those that randomize in the study will be presented in Table 9. The reasons for the exclusion of screened participants will be presented in Table 10.

2145  
2146

**Table 9. CS #2003 Cumulative Screening Summary: All Participants by Site**

| Site         | Screened | Excluded | Randomized | % Excluded |
|--------------|----------|----------|------------|------------|
| 1            |          |          |            |            |
| 2            |          |          |            |            |
| 3            |          |          |            |            |
| .            |          |          |            |            |
| .            |          |          |            |            |
| 15           |          |          |            |            |
| <b>Total</b> |          |          |            |            |

2147  
2148  
2149

**Table 10. CS #2003 Summary of Ineligibility: Primary Reason for Exclusion, All Sites**

| Primary Reason for Exclusion                                           | # Screened | # Excluded | % of Screened |
|------------------------------------------------------------------------|------------|------------|---------------|
| Less than 18 years of age                                              |            |            |               |
| Duration of SCI less than 6 months                                     |            |            |               |
| .                                                                      |            |            |               |
| .                                                                      |            |            |               |
| .                                                                      |            |            |               |
| No companion to assist at home                                         |            |            |               |
| Inability to provide informed consent                                  |            |            |               |
| Diagnosis of neurological injury other than SCI                        |            |            |               |
| Progressive condition likely to result in changing neurological status |            |            |               |
| .                                                                      |            |            |               |
| .                                                                      |            |            |               |
| .                                                                      |            |            |               |
| Psychopathology documentation that may conflict with study objectives  |            |            |               |
| Pregnancy or women planning to become pregnant during study            |            |            |               |
| <b>Total</b>                                                           |            |            |               |

2150 2. Background Characteristics at Entry

2151 Background characteristics of study participants are collected on the Screening/Baseline and  
2152 History & Physical Forms. Tables summarizing the important background characteristics by site  
2153 will be prepared and submitted to the Study Group so they will have an idea of the population  
2154 being studied and comparisons of enrollment among the sites can be made. This information will  
2155 be presented as means and medians for continuous variables and as frequency tables for discrete  
2156 variables. Table 11 shows how the continuous variable age will be presented. Other variables that  
2157 will routinely be presented will include gender, race, education and smoking history. Analysis of  
2158 variance and chi-square techniques will be used to identify any statistically significant differences  
2159 that may exist among the sites.  
2160

2161 **Table 11. CS #2003 Age Statistics by Site**

2162

| Site         | N | Mean (Years) | Standard Deviation | Median |
|--------------|---|--------------|--------------------|--------|
| 1            |   |              |                    |        |
| 2            |   |              |                    |        |
| .            |   |              |                    |        |
| .            |   |              |                    |        |
| .            |   |              |                    |        |
| 15           |   |              |                    |        |
| <b>Total</b> |   |              |                    |        |

2163 3. Data Quality and Protocol Adherence

2164 The final type of information that will be given to the Site Investigators is data that will allow them  
2165 to assess the quality of the data being submitted as well as how well the sites are adhering to the  
2166 protocol. These data will be given by site, so sites performing substantially below average can be  
2167 identified and remedial action taken to improve their performance.  
2168  
2169

2170 One piece of information that will be routinely provided is the number of forms that are missing  
2171 according to the participant's testing and training schedule. Table 12 indicates how this  
2172 information will be displayed.  
2173

2174 In addition to the tables for the reports, the computer auditing system produces Quality Control  
2175 (QC) reports that indicate the number of errors that were found on the individual forms. QC reports  
2176 that are overly large will identify those sites requiring additional training on forms completion. A  
2177

monthly report summarizing data submission and problem identification for each site will be sent to the Study Chairperson so that she can monitor how the participating sites are doing.

**Table 12. CS #2003 Number of Missing Forms by Site**

| # of Participants |   | Site |   |     |    | Total |
|-------------------|---|------|---|-----|----|-------|
|                   |   | 1    | 2 | ... | 15 |       |
| Form 01           | N |      |   |     |    |       |
|                   | % |      |   |     |    |       |
| Form 02           | N |      |   |     |    |       |
|                   | % |      |   |     |    |       |
| .                 |   |      |   |     |    |       |
| .                 |   |      |   |     |    |       |
| .                 |   |      |   |     |    |       |
| Form X            | N |      |   |     |    |       |
|                   | % |      |   |     |    |       |

**I. Study Monitoring by the Data Monitoring Committee (DMC)**

An independent oversight committee called the Data Monitoring Committee (DMC) will monitor study progress. This committee meets on the same basic schedule as the Study Group and Executive Committee, i.e., they will meet at 6 to 9 months after the start of patient recruitment and yearly thereafter. This committee does not usually meet during the last six months of a study. They will also meet once prior to the study startup to acquaint themselves with the study and to establish their procedures for reviewing and monitoring the study.

The major responsibility for the DMC members when they meet is to make a recommendation to the Director of the Cooperative Studies Program as to whether or not the study should continue. The study could be recommended for termination due to poor recruitment, treatment differences so large that it is possible to reach a final decision or treatment differences so small that continuation would be irresponsible. The DMC also reviews the participating sites' performance and makes recommendations concerning them. Data collected during the feasibility phase of the study, including site performance, verification of success rates in the control group and other operational measures, will be presented to the committee for its review and recommendations. Their final responsibility is to review all proposed protocol changes and sub-protocols and to make recommendations about their acceptability.

For the DMC to carry out its responsibilities, the CSPCC Study Team will provide the committee with a report approximately three weeks prior to their meetings. The report will consist of the tables described previously for the Study Group and Executive Committee reports as well as those

presenting baseline participant characteristics and outcome measures by treatment group. Differences between treatment groups on participant characteristics may indicate a need to use any significantly different characteristics as covariates for the outcome measures. Formal testing of the differences between treatment groups will be done at the study's conclusion. Analyses of variance techniques will be used to test characteristics that are continuous in nature, while chi-square techniques will be used for the discrete variable characteristics. The analyses of the primary and major secondary outcome measures are described above in section F. The results of these analyses will be provided in table format and will include the p-value from the chi-square analysis. Table 13 indicates how the MCS/VR-36 outcome measure will be displayed. Analyses of the SCI-QOL Physical Medical Health domain (three item banks for bladder management difficulties, bowel management difficulties and pain interference) and total body fat mass outcome measures will be presented in a similar fashion.

**Table 13. CS #2003 Primary Outcome Measure: Mental Component Summary (MCS) of the VR-36**

| ≥ 4-point improvement in MCS/VR-36 from baseline to end of 4-month intervention | SOC |   | EAW + SOC |   | Total |   | p-value |
|---------------------------------------------------------------------------------|-----|---|-----------|---|-------|---|---------|
|                                                                                 | n   | % | n         | % | n     | % |         |
| Success                                                                         |     |   |           |   |       |   |         |
| Failure                                                                         |     |   |           |   |       |   |         |
| Total                                                                           |     |   |           |   |       |   |         |

Secondary outcome measures and analyses (as outlined in section G above) will also be provided in tabular format. These tables will present statistics for the outcome variables at all the time points at which the outcome measures are assessed: baseline, after the training/orientation Phase, two months into the 4-month intervention phase, and then again at the end of the intervention phase. Again using the MCS/VR-36 as an example, Table 14 indicates how these data may be presented. The p-values from the comparison of the difference scores (difference from baseline to the end of each time point) and from the mixed models analyses, as appropriate, will also be presented in these tables.

**Table 14. CS #2003: VR-36 Mental Component Summary (MCS) Scores**

| Time Point                         | SOC |      |           |        | EAW + SOC |      |           |        |
|------------------------------------|-----|------|-----------|--------|-----------|------|-----------|--------|
|                                    | N   | Mean | Std. Dev. | Median | N         | Mean | Std. Dev. | Median |
| Baseline                           |     |      |           |        |           |      |           |        |
| Post-Training/Orientation          |     |      |           |        |           |      |           |        |
| Two Months into Intervention Phase |     |      |           |        |           |      |           |        |
| Post-Intervention Phase            |     |      |           |        |           |      |           |        |

For the DMC to make its recommendation for continuation of the study, it will be necessary for them to see the analysis of the primary and major secondary outcome measures every time they are provided a report of study progress and it is possible to calculate these measures. Periodic monitoring of interim results can significantly affect the probability of making an incorrect decision (Type-I error rate). One interim look at the primary outcome measures (in addition to the final “look” at study’s end) will be proposed to the DMC for making the recommendation about whether or not to continue the trial or to stop for early efficacy. It is proposed that the one look occur when 80 (50%) patients have completed participation in the study. The O’Brien-Fleming method for alpha spending and rejection/acceptance boundaries will be suggested for Type-I error rate control. The O’Brien-Fleming boundaries for rejection ( $\alpha$ ) and acceptance ( $\beta$ ) as well as the Type-I error rates for the two looks are given in Tables 15 and 16 for the MCS/VR-36 and SCI-QOL/PMH outcomes, respectively. The boundaries are presented graphically in Figures 10 and 11 for the two primary outcome measures.

**Table 15. CS #2003: Two-sided O’Brien-Fleming Boundaries for Rejection ( $\alpha$ ) and Acceptance ( $\beta$ ) – MCS/VR-36**

| Interim Look (Stage) | No. of Randomized Participants | Std. z (Rejection) |         | Std. z (Acceptance) |         | Type-I error |
|----------------------|--------------------------------|--------------------|---------|---------------------|---------|--------------|
|                      |                                | Lower              | Upper   | Lower               | Upper   |              |
| 1                    | 80                             | -3.12376           | 3.12376 | -0.88945            | 0.88945 | 0.00089      |
| 2                    | 160                            | -2.20883           | 2.20883 | -2.20883            | 2.20883 | 0.01250      |

**Figure 10. CS #2003 Combined Boundary Plot for MCS/VR-36**

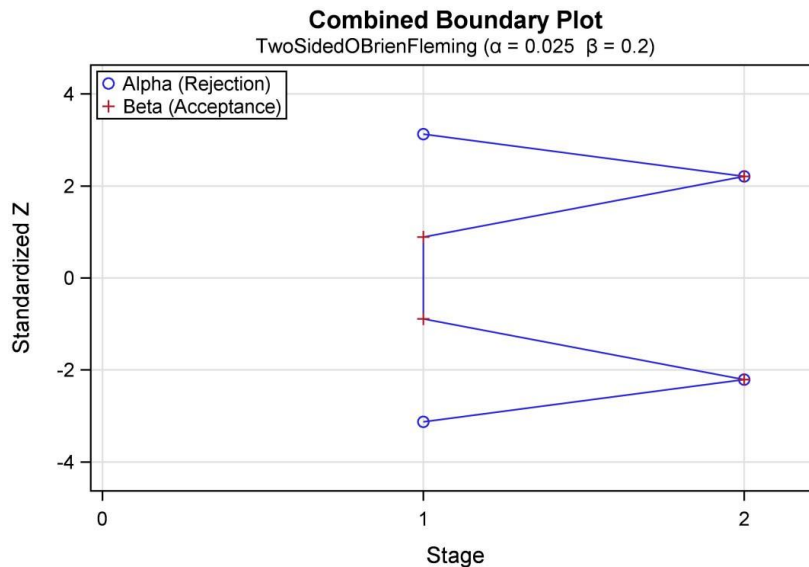

2256  
2257  
2258

**Table 16. CS #2003: Two-sided O’Brien-Fleming Boundaries for Rejection ( $\alpha$ ) and Acceptance ( $\beta$ ) – SCI-QOL Physical Medical Health (PMH) domain**

| Interim Look (Stage) | No. of Randomized Participants | Std. z (Rejection) |         | Std. z (Acceptance) |         | Type-I error |
|----------------------|--------------------------------|--------------------|---------|---------------------|---------|--------------|
|                      |                                | Lower              | Upper   | Lower               | Upper   |              |
| 1                    | 80                             | -3.16956           | 3.16956 | -0.40071            | 0.40071 | 0.00076      |
| 2                    | 160                            | -2.24122           | 2.24122 | -2.24122            | 2.24122 | 0.01250      |

2259  
2260  
2261  
2262

**Figure 11. CS #2003 Combined Boundary Plot for SCI-QOL Physical Medical Health (PMH) Domain**

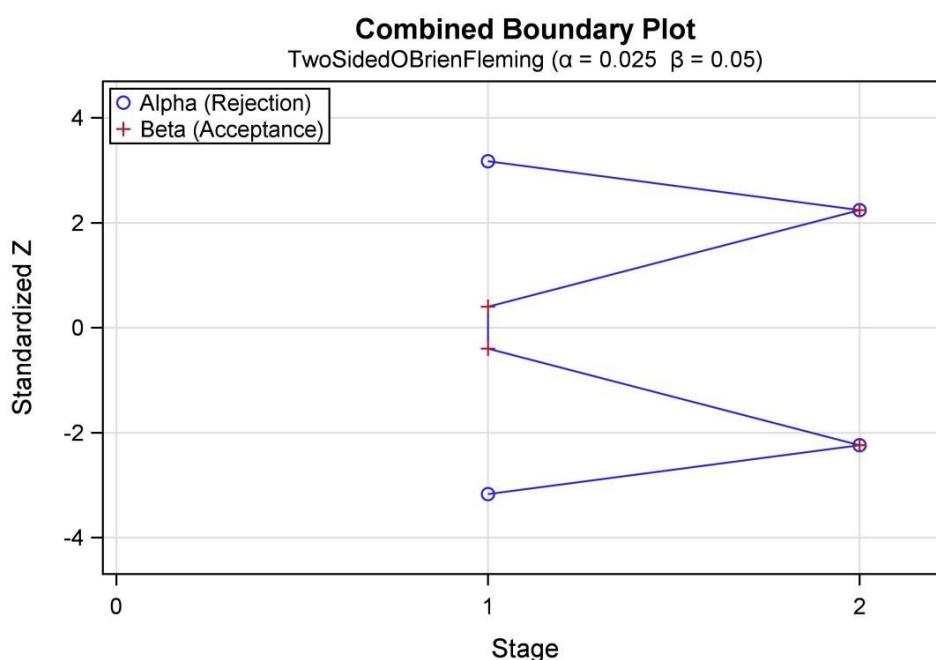

2263  
2264  
2265  
2266  
2267  
2268  
2269  
2270  
2271  
2272

As with any clinical trial, the safety of the participants will be of utmost concern. Safety will be monitored closely and data will be collected on adverse events (AEs) and serious adverse events (SAEs) throughout the course of the study. All AEs and SAEs will be systematically recorded on case report forms and coded by the CSP Clinical Research Pharmacy Coordinating Center (CSPCRPCC) at Albuquerque using the MedDRA system. The MedDRA system employs standard terminology to present adverse events and to organize them by body system. The incidence of adverse events will be summarized for each treatment group and overall, by body system and MedDRA preferred term. The incidence differences between the control and intervention groups for each event will be tested using the Pearson chi-square test or Fisher’s Exact test. Table 17 illustrates how AE data may be presented for this study.



2273  
2274  
2275

**Table 17. CS #2003 Cumulative Incidence of Adverse Events by Body System and MedDRA Term**

| Body System and Preferred Term           | SOC<br>(n = ?) | EAW + SOC<br>(n = ?) | All Participants<br>(N = ?) | p-value |
|------------------------------------------|----------------|----------------------|-----------------------------|---------|
|                                          | n (%)          | n (%)                | n (%)                       |         |
| All Adverse Events                       |                |                      |                             |         |
| Subjects with at least one Adverse Event |                |                      |                             |         |
|                                          |                |                      |                             |         |
| Body System 1                            |                |                      |                             |         |
| Event 1                                  |                |                      |                             |         |
| Event 2                                  |                |                      |                             |         |
| Event 3                                  |                |                      |                             |         |
| .                                        |                |                      |                             |         |
| .                                        |                |                      |                             |         |
| .                                        |                |                      |                             |         |
| Body System 2                            |                |                      |                             |         |
| Event 7                                  |                |                      |                             |         |
| Event 8                                  |                |                      |                             |         |
| Event 9                                  |                |                      |                             |         |
| Event 10                                 |                |                      |                             |         |
| .                                        |                |                      |                             |         |
| .                                        |                |                      |                             |         |
| .                                        |                |                      |                             |         |
| Body System N                            |                |                      |                             |         |
| Event 14                                 |                |                      |                             |         |
| Event 15                                 |                |                      |                             |         |
| Event 16                                 |                |                      |                             |         |
| .                                        |                |                      |                             |         |
| .                                        |                |                      |                             |         |
| .                                        |                |                      |                             |         |
| Event N                                  |                |                      |                             |         |

2276  
2277  
2278  
2279  
2280  
2281  
2282  
2283  
2284  
2285

It is the responsibility of the CSPCC Study Team to provide the DMC with whatever information they feel they need to successfully monitor the study. Thus, additional tables will be added as required. In addition to the reports for the yearly meetings, the DMC will also be provided with reports between meetings at 6-month intervals.

**XIV. QUALIFICATIONS**

**A. Site Qualifications**

2286 The Site Investigator is required to be a SCI staff physician. S/he will be responsible for the initial  
2287 contact with any potential participants. Once a potential participant expresses verbal interest,  
2288 additional study team members may continue the informed consent and eligibility screening  
2289 process. The Site Investigator will perform the History and Physical (H&PE) and INSCSCI  
2290 examinations. If there is skin breakdown or an abrasion due to contact friction with the  
2291 exoskeleton, the Site Investigator/Physician works with the Trainers and participant to determine  
2292 if the participant needs to take time off to allow it to heal or if the addition of padding or equipment  
2293 adjustments is sufficient to prevent further breakdown and the participant may continue in the  
2294 training sessions. Additional, co-Investigators who are physicians are welcome to help defray  
2295 some of the workload from the Site Investigator; however, the Site Investigator will ultimately be  
2296 responsible for overseeing all conduct related to the CS #2003 at their site. Co-Investigators from  
2297 other disciplines are also welcome to be part of this study. Each site will need to provide a clear  
2298 description of additional co-Investigator roles in the study.

2299  
2300 The proposed study will require fifteen sites. Each site will have four full time staff who would  
2301 be solely dedicated to the conduct of the study (1 ReWalk Trainer, 2 Assistant ReWalk Trainers  
2302 and 1 Study Coordinator). Two staff persons are needed during the initial EAW Training phase  
2303 for each of the participants. The ReWalk Trainer will have a clinically relevant professional  
2304 background such as a biomedical, electrical or mechanical engineer, physical therapist, exercise  
2305 physiologist, occupational therapist, nurse, athletic trainer, or equivalent. The ReWalk Trainer will  
2306 be responsible for the screening of participants, scheduling, fitting and training of the exoskeleton,  
2307 and mobility measurement aspects of the protocol. The ReWalk Trainer and Assistant ReWalk  
2308 Trainers will be responsible for the administrative paperwork, assist with eligibility screening,  
2309 assist with the informed consent process, scheduling of participants, the home evaluation when  
2310 needed, the EAW training, weekly and monthly participant contact during the orientation and  
2311 home use phases of the study, ensuring the Usual Activity log and EAW Activity Log are  
2312 completed, reporting adverse events, and all other aspects of the study protocol. The Assistant  
2313 ReWalk Trainers will assist the trainer in all EAW aspects of the study. All of the Trainers must  
2314 be capable of assisting with the EAW training and as such, are expected to be healthy and free of  
2315 back or other medical problems that would be contraindicated for lifting and carrying 60 pounds  
2316 across a room. The Trainers must be able to lift the exoskeleton from one chair to another, or to  
2317 place one in or take it out of the trunk of a car or van.

2318  
2319 CS #2003 study will also support a Site Coordinator. The Site Coordinator will be responsible for  
2320 the administration of the QOL outcome surveys, local Research & Development and CIRB

2321 application paperwork and assisting with scheduling and data entry. The study Coordinators may  
2322 be physical therapists, PT assistants, exercise physiologists, nurses, nurse assistants, research  
2323 health science specialists or technicians, or other comparable disciplines that have experience with  
2324 research methods and procedures and experience and knowledge about persons with SCI.  
2325 Approved and classified PDs will be provided to the sites for recruitment of study personnel if  
2326 requested.

2327  
2328 Each Site will need the following:

- 2329 1. Access to a bone mineral densitometer or space for the ones to be provided by CS #2003;
- 2330 2. Secure space for storage of the ReWalk units;
- 2331 3. Space for overnight battery charging of the ReWalk units;
- 2332 4. Space for training participants to walk in the units (e.g., hallways, sidewalks, etc.);
- 2333 5. Space for desk or office for study personnel (x4);
- 2334 6. Access to the VA car pool;
- 2335 7. Secure space for study files;
- 2336 8. Dedicated study VA computer;
- 2337 9. Evidence of medical center support; and
- 2338 10. Access to a fax machine.

2339  
2340 **B. Site Participation**

2341 An invitation letter and brief description of the CS #2003 was sent to each of the SCI Service  
2342 Chiefs to establish level of interest and available resources. Eighteen potential study sites  
2343 responded with interest in participating in this study. Fifteen sites have been selected as the  
2344 primary sites (Table 19). Criteria for site selection included: interest in being part of the study,  
2345 the number of SCI patients seen in the catchment area, the number who use the site for outpatient  
2346 visits, CSP NODE status, geographic location, availability of a bone mineral density (BMD)  
2347 scanner for the BMD criteria, hospital space for the ReWalk training, secure storage of the devices,  
2348 study files, and availability of staff desk and computer space. Additionally, in an effort to place  
2349 sites at VAMCs in the geographic sections of the whole US, geographic location was used as a  
2350 selection factor. Having more than 400 SCI patients seen annually in the outpatient clinic and  
2351 being a Node were the two highest priority selection criteria, followed by geographic location.  
2352

| Table 19. CSP #2003 Study Sites |                           |                             |                                                                        |                           |              |                             |                                   |
|---------------------------------|---------------------------|-----------------------------|------------------------------------------------------------------------|---------------------------|--------------|-----------------------------|-----------------------------------|
| VA Medical Center and NODE Site |                           | Site Investigator           | Email                                                                  | Type of Scanner           | iDXA Status  | # SCI Veterans in catchment | # SCI Veteran outpatient visits/y |
| 1                               | <b>Boston</b>             | Sunil Sabharwal, MD         | <a href="mailto:sunil.sabharwal@va.gov">sunil.sabharwal@va.gov</a>     | Hologic (Medical Center)  | iDXA needed  | 1200                        | 500                               |
| 2                               | <b>Richmond</b>           | Lance L. Goetz, MD          | <a href="mailto:lance.goetz@va.gov">lance.goetz@va.gov</a>             | DXA (SCI Service)         | iDXA needed  | 1400                        | 501                               |
| 3                               | <b>Tampa</b>              | Kevin T. White, MD          | <a href="mailto:kevin.white2@va.gov">kevin.white2@va.gov</a>           | Hologic (Medical Center)  | iDXA needed  | 1200                        | 820                               |
| 4                               | <b>Houston (Node)</b>     | Sally Ann Holmes, MD        | <a href="mailto:SallyA.Holmes@va.gov">SallyA.Holmes@va.gov</a>         | iDXA (Medical Center)     | upgrade only | 610                         | 400                               |
| 5                               | <b>Palo Alto (Node)</b>   | Doug Ota, MD                | <a href="mailto:Doug.Ota@va.gov">Doug.Ota@va.gov</a>                   | iDXA (SCI Serevice)       | upgrade only | 1028                        | 400                               |
| 6                               | <b>Long Beach (Node)</b>  | Alice Jennifer Hon, MD      | <a href="mailto:alice.hon3@va.gov">alice.hon3@va.gov</a>               | Hologic (Medical Center)  | iDXA needed  | 773                         | 275                               |
| 7                               | <b>Minneapolis (Node)</b> | Byron Eddy, MD              | <a href="mailto:Byron.Eddy@va.gov">Byron.Eddy@va.gov</a>               | Hologic (Medical Center)  | iDXA needed  | 700                         | 175                               |
| 8                               | <b>Dallas (Node)</b>      | Bridget R. Bennett, MD      | <a href="mailto:Bridget.Bennett@va.gov">Bridget.Bennett@va.gov</a>     | Hologic (Medical Center)  | iDXA needed  | 900                         | 700                               |
| 9                               | <b>Milwaukee</b>          | Denis F. Castillo, MD       | <a href="mailto:Denis.Castillo@va.gov">Denis.Castillo@va.gov</a>       | Hologic (Medical Center)  | iDXA needed  | 433                         | 394                               |
| 10                              | <b>St. Louis</b>          | Katherine C. Stenson, MD    | <a href="mailto:Katherine.Stenson@va.gov">Katherine.Stenson@va.gov</a> | iDXA (Medical Center)     | upgrade only | 433                         | 394                               |
| 11                              | <b>Augusta</b>            | Michael Priebe, MD          | <a href="mailto:Michael.Priebe@va.gov">Michael.Priebe@va.gov</a>       | iDXA (Medical Center)     | iDXA needed  | 1200                        | 900                               |
| 12                              | <b>San Antonio</b>        | Michelle Trbovich, MD       | <a href="mailto:Michelle.Trbovich@va.gov">Michelle.Trbovich@va.gov</a> | GE Lunar (Medical Center) | iDXA needed  | 451                         | 240                               |
| 13                              | <b>Bronx</b>              | Stephen Kornfeld, DO        | <a href="mailto:Stephen.Kornfeld@va.gov">Stephen.Kornfeld@va.gov</a>   | iDXA (SCI Serevice)       | iDXA needed  | 711                         | 333                               |
| 14                              | <b>Albuquerque</b>        | Nancy Cutter, MD            | <a href="mailto:Nancy.Cutter@va.gov">Nancy.Cutter@va.gov</a>           | iDXA (Medical Center)     | iDXA needed  | 500                         | 400                               |
| 15                              | <b>Cleveland</b>          | Mary Kristi Henzel, MD, PhD | <a href="mailto:Mary.henzel@va.gov">Mary.henzel@va.gov</a>             | iDXA (Medical Center)     | iDXA needed  | 1200                        | 400                               |
| <b>Sub Total</b>                |                           |                             |                                                                        |                           |              | <b>13,606</b>               | <b>7,022</b>                      |

2354  
2355  
23562357  
2358  
2359  
2360

CSP #2003  
Exoskeletal Assisted Walking with Persons with SCI: Impact on Quality of Life (PEPSCI)  
Version 7.2 Protocol July 2021

361 **C. Office of the Chair Qualifications**

362 CS #2003 has two study principal proponents, Dr. Ann M. Spungen (Chair) and Dr. William A.  
363 Bauman (Co-Chair). The Chair's Office is requesting two National Coordinators and a Staff  
364 Assistant. The two National Coordinators will perform separate and distinct functions to ensure  
365 successful completion of the clinical trial. One FTE would be for a biomedical engineer at the  
366 GS-13 level, and s/he will have significant experience and be an expert in conducting ReWalk  
367 fitting, training and troubleshooting; this person would oversee all training and standardization  
368 with the exoskeletal device. The Co-National Coordinator (1.0 FTE) would be at the GS-12 level,  
369 and s/he must have significant experience in performing and teaching the administration of the  
370 SCI-QOL and other participant-reported measures of quality of life. This person would oversee  
371 the standardization across sites for all of the QOL assessment tools proposed to be administered  
372 and ensure that the Site Coordinators are trained in the administration of these assessment tools.  
373 The Staff Assistant (GS-9, 1.0 FTE) will assist the Chair's Office with administrative paperwork,  
374 travel paperwork, and scheduling of site training. Complete descriptions of the Chair's Office  
375 staff responsibilities may be found in the position descriptions in the Budget Justification section.  
376

377 **XV. PLANS TO ASSURE SECURITY AND CONFIDENTIALITY OF STUDY DATA**

378  
379 Each participant will be assigned a participant number and unique alpha code for the case report  
380 forms and source documents. A code key (screening log) will be maintained at each investigational  
381 site. The participant number will be assigned as they are consented in the study. The site number  
382 along with their participant number will uniquely identify that person; however, it will not contain  
383 any personal identifiable information.  
384

385  
386 Data collection which contains any protected health information (PHI) such as informed consent  
387 forms, Health Insurance Portability and Accountability Act (HIPAA) forms, and contact  
388 information will be stored within each individual site and will remain either in locked cabinets or  
389 electronically behind the VA firewall in a password-protected file. Only approved study personnel  
390 will be permitted access to view study related folders. In addition, access to the study folders  
391 stored on the VA network will be restricted to personnel listed on this study. This will further limit  
392 access to files stored on the VA network that contain PHI and outcome data related to this study.

393  
394 SharePoint will be utilized within this study as it has been considered an approved collaboration  
395 environment and access to the SharePoint site can be restricted by the study team as needed.

396 SharePoint will be utilized as an intranet portal to maintain documents, manage files and other  
397 collaborative efforts securely. All data will be sent to the Coordinating Center at Perry Point using  
398 DataFax which is a system to send case report forms using a fax machine to Perry Point which will  
399 maintain the data repository for all sites. To ensure that all questions are answered on the QOL  
400 outcome assessments (VR-36, SCI-QOL, Global Impression of Change Scale (Participant- and  
401 Companion-rated), PROMIS Sleep Disturbance, SCI-FI, and bowel function surveys), the site's  
402 study staff will conduct in-person or telephone interviews. Testing and survey procedures will be  
403 conducted in private rooms and training will be performed in rooms and hallways of the VA SCI  
404 Services, on the medical center grounds when weather conditions permit, at Community Based  
405 Outpatient Centers (CBOCs) under the same FWA number as the VA facility conducting the  
406 research, and/or in the participant's home or community.

## 407 **XVI. DATA MANAGEMENT AND DATA SECURITY PLANS**

408

409 Most data collection will be non-sensitive data that will be coded using a subject number that will  
410 link the data to a specific subject. Data collection may also take place through secure messaging  
411 using My HealtheVet. The code to the subject number will be stored in a separate secure location  
412 within the VA Network at each site. Access to sensitive data will be restricted to authorized users;  
413 access will be related to VA-approved research, data users and custodians. VA and non-VA staff  
414 will be aware that they must immediately report theft or loss of VA sensitive data or media  
415 containing VA sensitive data to the site VA Information Security Officer (ISO). Electronic VA  
416 sensitive data will be collected, used and stored on VA computers on the VA network (behind the  
417 VA firewall), on restricted access drives, and in password protected files. Hard copies of VA  
418 sensitive data will be collected and used and stored in locked cabinets in locked rooms. Any code  
419 linking identities to data will be stored separately from the data, electronically behind the VA  
420 firewall or hard copy in a locked cabinet in a locked room. Special access will be granted to study-  
421 related data to the sponsor and regulatory boards upon request. This will include representatives  
422 of the Food and Drug Administration (FDA), the Central Institutional Review Board (CIRB),  
423 Office of Research Oversight (ORO), and compliance officers, etc. Written documentation of any  
424 review of study related files will be required. This documentation will be stored with the study  
425 related paperwork. All subjects that are enrolled in the CS #2003 study will be informed of any  
426 potential review by these regulating bodies during the consent process.  
427

428 Training for data collection and management will be conducted for all sites prior to initiating the  
429 study in order to ensure that the data is collected in the same manner and all study staff understand  
430

431 the source documents and case report forms. Data from the sites will be sent to the Coordinating  
432 Center, Perry Point, MD. All hard copies of case report forms collected will be stored within locked  
433 cabinets at the sites. Electronic data will be stored on servers protected by the VA firewall. This  
434 study will utilize SharePoint as a method of maintaining documents and collaborating across the  
435 other VA sites. Restricted and selective access can be granted administratively to the SharePoint  
436 environment in order to prevent unauthorized access.

437  
438 QOL outcome assessments (VR-36, SCI-QOL, Global Impression of Change Scale (Participant-  
439 and Companion-rated), PROMIS Sleep Disturbance, SCI-FI, and bowel function surveys) will be  
440 completed by each participant during an in-person or phone interview by a member of the study  
441 site staff. The interviewer will record the answers, making sure that all questions are answered.  
442 This data will be sent to the CSPCC via a Datafax system.

## 443 **XVII. PLANS FOR DISSEMINATION OF STUDY RESULTS**

444

### 445 **A. Publication of Research Results**

446

447  
448 It is the policy of the Cooperative Studies Program not to reveal outcome data to Site Investigators  
449 until the data collection period of the study is complete. This policy is meant to prevent possible  
450 biases that might affect data collection. Members of the DMC will be reviewing outcome results  
451 to ensure that the study will be terminated early if a treatment is identified as prohibitively  
452 dangerous or if a definitive answer is reached prior to the scheduled study termination date.

453  
454 All presentations and publications resulting from this study will follow CSP policy as specified by  
455 the CSP guidelines. The presentation or publication of any or all data collected by Site  
456 Investigators on patients entered into a Department of Veterans Affairs Cooperative Study is under  
457 the direct control of the study's Executive Committee. No individual Site Investigator has the  
458 right to use the study's data to perform analyses or interpretations, or to make public presentations  
459 or seek publication of any or all of the data without specific approval of the Executive Committee.

460  
461 The Executive Committee has the authority to establish any number of publication committees,  
462 which usually will comprise of subgroups of Site Investigators and some members of the Executive  
463 Committee, for the purpose of producing manuscripts for presentation and publication. Any  
464 presentation or publication related to this study should be circulated to the Executive Committee  
465 for review, comments and suggestions at least four weeks prior to submission of the manuscript to

466 the presenting or publishing body.

467 All publications must give proper recognition to the funding source and should list all study  
468 participating site personnel (not necessarily as authors of the manuscript). If an investigator's  
469 major salary support and/or commitment is from the VA, it is obligatory that the investigator lists  
470 the VA as his/her primary institutional affiliation. Submission of manuscripts or abstracts must  
471 follow the usual VA policy; ideally, a subtitle states, "A Department of Veterans Affairs  
472 Cooperative Study." The CSP also requires that every manuscript be reviewed and approved by  
473 the CSPCC Director prior to submission as a final quality control step. Mechanisms for appeal by  
474 an investigator will follow procedures defined by the VA Office of Research and Development.  
475 Participation in a Department of Veterans Affairs Cooperative Studies Program clinical trial is  
476 voluntary. Any investigator who cannot accept these operational guidelines regarding publication  
477 policy should not volunteer to participate in the study.  
478

#### 479 **B. Planned Publications**

481 The Executive Committee, led by the study Chair, Dr. Spungen, on behalf of the study group, will  
482 prepare the primary outcome manuscript and investigators with special interest will prepare the  
483 secondary outcome manuscripts in each of these areas, as to be determined by the Executive  
484 Committee. The Executive Committee will consider additional ideas for sub-study manuscripts  
485 from members participating in the study. Sub-study activities (within the scope of this original  
486 protocol) may be authorized by the Executive Committee to address other important research  
487 questions raised.  
488

489 Primary publication: Upon completion of the study, a manuscript will be prepared that focuses on  
490 the primary outcome, i.e. the proportion of subjects demonstrating a clinically significant change  
491 in MCS/VR-36 and the patient-reported outcomes for SCI-QOL bladder management difficulties,  
492 bowel management difficulties and pain interference, as compared between the Intervention and  
493 Control groups. This proportion of participants who achieved the major secondary outcome for  
494 total body fat mass changes will also be reported in the primary manuscript. Any adverse events  
495 will be reported as well.  
496

497 Other publications: Upon completion of the study and the acceptance of the primary manuscript  
498 for publication, the secondary outcomes will be analyzed for the PROMIS sleep disturbance, bowel  
499 function survey, the remaining items in the SCI-QOL that were not included in the primary  
500



501 outcomes, the physical function domains from the SCI-FI, and lipid profile results. The amount  
502 of time spent in the device and location of use will be reported in conjunction with any of the above  
503 manuscripts.

## 504 **XVIII. HUMAN SUBJECTS PROTECTION CONSIDERATIONS**

505

### 506 **A. Recruitment of Participants and Special Considerations**

507

508 The targeted study population to be studied is Veterans or military members with SCI (>6 months)  
509 who are non-ambulatory and a primary wheelchair user for mobility. The Site Investigator is  
510 required to be a SCI staff physician. S/he will be responsible for the initial contact with any  
511 potential participants. Once a potential participant expresses interest and gives verbal permission  
512 to learn more, additional study team members will assist the Site Investigator with the informed  
513 consent and eligibility screening process. There are no race, ethnicity or gender limitations for  
514 enrollment. The age range is limited to who are at least 18 years of age. There is no upper age  
515 limit because if someone passes all the inclusion and exclusion criteria, being of an older age, but  
516 in good health should not be exclusionary in of itself. Special classes of subjects such as pregnant  
517 women, prisoners, institutionalized individuals, or other populations that may be considered  
518 vulnerable will be excluded from this study with the exception of economically and educationally  
519 disadvantaged persons. There are Veterans and military members who are economically,  
520 educationally or socially disadvantaged individuals and they will be given the opportunity to  
521 participate in this research project. These disadvantaged persons will be given the same treatment  
522 as individuals who are not considered to be vulnerable.  
523

### 524 **B. Inclusion of Women and Minorities in Study**

525

526 Consistent with the Belmont Report, “Ethical Principles and Guidelines for the Protection of  
527 Human Subjects,” and Congressional legislation, eligible women and minorities will be included  
528 in this study.  
529

### 530 **C. Description of the Consenting Process**

531

532 Consent will be obtained prior to study enrollment by the Site Investigators or a member of the  
533 study research team. Study team members will be trained to obtain consent. They will be  
534 responsible for explaining the proposed clinical trial and answering questions before obtaining  
535

536 informed consent. The consent will be explained in its entirety by the study team. The terms of  
537 the consent form will be explained prior to obtaining the individual's signature. Individuals will  
538 be given the opportunity to take the consent home for review with family members (if they so  
539 choose), to think about it overnight, and to ask questions prior to signing the consent form.  
540 Participants will be asked to explain back to the study team member what they believe the study  
541 entails, thus giving the opportunity for the study team member to correct any misunderstandings  
542 or add further detail. Potential participants will be informed of their right to ask questions at any  
543 time during the trial and/or to withdraw at any time. The potential participants will be informed  
544 that choosing to not participate or to withdraw will not infringe on any of their regular VA benefits  
545 or medical care.

546  
547 The timing of the consent process will take place prior to any screening assessments. The location  
548 of the consent process will primarily be in the site's area where the research will be conducted but  
549 is not limited to these areas. Additional locations where the consent process could take place  
550 include a physician's office, the investigator's offices, and/or designated rooms where privacy can  
551 be maintained (to include Community Based Outpatient Centers (CBOCs) under the same FWA  
552 number as the VA facility conducting the research). Additional locations could include the  
553 participant's home or community space where privacy can be maintained.

554  
555 During the consent process, the participant's privacy will be maintained by using a private room.  
556 Participants who wish to have a family member or a friend in attendance during the consent process  
557 may do so. Ample time for decision making will be provided and the potential participant will be  
558 allowed and encouraged to discuss the proposed clinical trial with anyone before making a  
559 decision.

560  
561 There will not be a plan for the consent of the individual's Legally Authorized Representative  
562 because an inability to sign consent is exclusionary to this clinical trial.

563  
564 \*Consenting of the companions may be obtained at the time the participant consents or during the  
565 Screening Phase for the enrolled participants. Consenting of the companions may take place in  
566 person or assent may be obtained over the phone.

#### 567 **D. Participant Compensation**

568

569 A potential barrier to recruitment is the travel and time commitment for persons with SCI to enroll  
570

571 in this study. A small stipend of \$30 per visit to the SCI Centers has been included in the budget  
572 to help defray some of the expense and inconvenience of travel for participants in this study.  
573 During Screening, stipends will be given for up to 3 visits for screening/baseline evaluations (max.  
574 \$90) and up to 5 days for EAW basic training (max. \$150). At JJPVAMC, during the pilot study,  
575 it was found that participants were highly motivated to attend the 3 times weekly exoskeletal-  
576 assisted walking sessions and compliance was greater than 90%. Reimbursement for  
577 transportation and lodging may be made available to participants and companions who live more  
578 than 45 miles away from the SCI Centers. The amount will vary based on distance and will be  
579 arranged in advance with the study team.

### 580 **E. Safety Considerations**

582 Trainers will be able to identify symptoms and signs of autonomic dysreflexia (AD), such as rapid  
583 increase in blood pressure, flushing in the face, sweating above the level of injury; or symptoms  
584 of orthostatic hypotension, such as paling of the face and participant reporting lightheadedness.  
585 Study Trainers will have a policy in place at their facility in order to address these types of  
586 emergencies. These policies should include a place where the participant can be brought to a  
587 sitting position or safely laid down on the floor. Once they are in a safe position, the cause of the  
588 problem can be assessed, and appropriate steps can be taken. If there is an “error” in the ReWalk  
589 device, the Trainers will assist the participant to a sitting position using the graceful collapse  
590 feature. It will be strongly recommended that participants receiving anticoagulation therapy wear  
591 a helmet during use of the exoskeleton.  
592

### 593 **F. Foreseeable Risks**

594  
595 The potential risks associated with having a person with SCI dynamically load in an upright  
596 position and walk overground with a powered exoskeleton include: hypotension, low-impact  
597 fracture, falls resulting in bone fracture, muscle soreness or tear, joint damage, or other  
598 musculoskeletal injury, skin breakdown, and/or AD.  
599

600 To date the investigative staff at the JJPVAMC has trained 12 participants to use the ReWalk  
601 system. In these initial 12 participants, there were no study related SAEs. One participant fell as  
602 a result of undetected water on the floor, but was not injured from the fall. There were minor skin  
603 abrasions (reported as study-related adverse events), which were resolved with additional padding  
604 and alterations in the fitting of the device. The group who initially studied the ReWalk at Moss  
605

506 Rehabilitation Hospital, Philadelphia, PA reported their adverse events [43]. Esquenazi et. al.,  
507 reported the following adverse reactions during his phase 1 clinical trial performed at Moss  
508 Rehabilitation Hospital, Philadelphia, PA: “(1) skin abrasions in areas of contact with the device,  
509 (2) lightheadedness, and (3) edema of the lower limbs [43, 83]. They were all managed by the  
510 appropriate use of (1) foam and padding, (2) caffeinated beverage intake and adjustment of blood  
511 pressure medication, (3) elastic stockings and rest, respectively. There were no detrimental  
512 changes in vital signs or complaints of lightheadedness with prolonged standing.” Additional  
513 hazards to walking overground using a robotic exoskeleton include the risk of equipment  
514 malfunction, battery dying, or any unknown or unpredictable problem.

515  
516 There are also some risks associated with the measurements obtained by the dual x-ray  
517 absorptiometry (DXA) scanner and the bilateral calcaneus x-rays. These medical diagnostic  
518 devices emit small amounts of radiation, approximately  $8\mu\text{Sv}$  (DXA) and  $2\mu\text{Sv}$  (bilateral x-rays).  
519 This amount of radiation is similar to normal background radiation amounts from radon, food,  
520 water, and cosmic radiation. There are risks associated with phlebotomy which include pain,  
521 swelling, bruising or skin irritation at the site of the venous puncture and rarely, syncope in persons  
522 who are susceptible to a vasovagal response. There are risks associated with anticoagulation  
523 therapy if a participant were to fall and hit their head. It will be strongly recommended that  
524 participants receiving anticoagulation therapy wear a helmet during use of the exoskeleton.

## 525 **G. Risk Management and Emergency Response**

527  
528 All potential participants will be examined, and their medical charts will be reviewed by the  
529 study team physician (who is also a member of the study site’s medical center staff) before being  
530 cleared for participation. Study personnel will be in attendance at all times while a participant is  
531 using the exoskeleton and while all testing is being performed. Blood pressure and heart rate will  
532 be monitored before, during, and after the training sessions, primarily to identify changes in  
533 blood pressure. The study staff will query the participants throughout each session for early  
534 signs or symptoms of hypotension such as feeling light-headed or queasiness. During the sessions,  
535 persons with a fall in blood pressure from their pre-session seated BP of  $>20/10$  mmHg will be  
536 seated or brought to a supine position. The staff involved with this study will be trained to look  
537 for signs and symptoms of AD. Most persons with SCI are also knowledgeable about AD, but all  
538 participants will also be made aware of these signs and symptoms of AD. The legs where the  
539 straps are fastened will be examined for skin breakdown during (as needed) and after training  
540 sessions to ensure that there are no areas that may be abrading. If evidence of skin redness,

541 irritation or breakdown exists, alternate placements for straps and/or padding will be used to  
542 protect the area. Participants who have continued breakdown will be temporarily discontinued.  
543 Participants will be checked after each session for signs of edema. If edema is present, participants  
544 will be instructed to elevate their feet, use compression socks for the next session, and/or reduce  
545 the upright time or training frequency. If edema persists more than one day, the participant will be  
546 referred to the Site Physician. Training sessions will be discontinued if need be.

547  
548 The ReWalk powered exoskeleton has safeguards built within the device to prevent or minimize  
549 injury to the user. The system can detect if there is a mechanical or electrical problem and  
550 automatically causes the device to remain in the standing position, preventing the user to walk in  
551 the system. The only movement the device will be able to do is sit down so that the user can be  
552 removed from the system safely. If there is a mechanical error while in the sitting position, the  
553 device will not allow the user to stand in the system, and there will be a sound alerting the person  
554 that there is a problem. If there is a sudden loss of power while standing or walking, there is a  
555 safety mechanism that will stiffen the joints of the exoskeleton passively and cause the joints to  
556 rotate slowly so that the person can have a “graceful” collapse to the floor without causing them  
557 harm. The “graceful” collapse function allows time for a protective response with the arms to  
558 reach for the ground. The ReWalk exoskeleton is instrumented with two power sources; one main  
559 battery which has power for up to 4 hours of continuous walking and an additional back up battery  
560 which has power for up to an additional 30 min of walking. The participant, companion and study  
561 team members will be instructed to ensure that the power source of the system is fully charged  
562 prior to any use of the ReWalk.

563  
564 To prevent tripping over obstacles, the areas used for the sit-to-stand, stand-to-sit, walking, and  
565 stepping will be checked before and during each session to be free of any obstacles and water on  
566 the floor. There are risks associated with anticoagulation therapy if a participant were to fall and  
567 hit their head. It will be strongly recommended that participants receiving anticoagulation therapy  
568 wear a helmet during use of the exoskeleton. To prevent a potential fall, participants will not be  
569 progressed to walking until they have mastered the basic skills set. Additionally, all participants  
570 will be spotted by at least one study team member (and/or their companion once trained) while  
571 using the ReWalk and never left unattended.

572  
573 Additional efforts to minimize the risk of fracture will be done by excluding those veterans with  
574 BMD in the extremely low range. Measurement of the BMD is part of the screening and eligibility  
575 criteria for participation in this study. Those potential participants who have low bone mass will

576 be excluded from the study (please see inclusion/exclusion criteria for details). There is risk  
577 associated with radiation exposure. The BMD assessment has a small amount of radiation  
578 exposure from the DXA scan. Measurements of two areas for BMD (hips and knees) will be  
579 performed one time for screening. The total body scan will be performed at baseline and will be  
580 repeated three additional times during the study. The following is a list of radiation exposure  
581 associated with each scan area obtained in this study.

| <u>Scan Type</u> | <u>Entrance Dose</u> | <u>Effective Dose</u> | <u>Scan Time</u> |
|------------------|----------------------|-----------------------|------------------|
| Hips             | 329 $\mu$ Gy         | 12.3 $\mu$ Sv         | 212 sec          |
| Knee             | 34 $\mu$ Gy          | unavailable           | 54 sec           |
| Total Body       | 6 $\mu$ Gy           | 8.62 $\mu$ Sv         | 739 sec          |
| Foot x-ray       | unavailable          | 2.0 $\mu$ Sv          | <1 sec           |

583 Values of radiation absorption (i.e. Effective Dose) for knee scans do not exist at this time.  
584 However, considering both the amount of radiation emitted and the scan time is lower than that of  
585 the other scans, the absorbed amount should also be lower than that of the hips (GE Medical  
586 Systems, Madison WI). The estimated sum quantity of radiation exposure from all of these DXA  
587 measurements combined is <35  $\mu$ Sv of absorbed radiation. This measurement is minimal even  
588 when compared to a routine chest x-ray which has an approximate dose of 60  $\mu$ Sv. In addition,  
589 the average person in New York City receives approximately 3000  $\mu$ Sv/year. Therefore, these tests  
590 would need to be repeated 85 times to receive an equivalent dose.  
591

## 592 **H. Emergency Care Plan**

593  
594 This study will be conducted in the VA hospitals at fifteen sites, in the CBOCs under the same  
595 FWA as the sites, or in the participant's home/community. During site visits and when training is  
596 conducted in the VA hospitals, the VA Hospital's emergency department would be called in the  
597 event of a medical emergency. If a participant is injured as a result of this study, the hospital site  
598 will be responsible for their medical care and the costs of this care. If a participant is seriously  
599 injured in their home or community environment during training or when using the device in their  
700 home, the study team and the participant (or their companion) will be instructed to call 911.  
701

## 702 **I. Potential Benefits**

703  
704 The information gained from this study may be scientifically useful to the field of SCI medicine.  
705

706 The individual may experience improvements in QOL, but this is not guaranteed. An additional  
707 benefit of this study is to share the knowledge gained with the SCI Clinical Services in the VA  
708 system.

709 The participant will have both the participant version of the Informed Consent and HIPAA forms  
710 to sign. The Companion will have the option to sign the companion version of the Informed  
711 Consent and HIPAA authorization or provide assent over the phone. Only demographic  
712 information and AE / SAE information will be collected on the companions. A sample version of  
713 these five documents may be viewed in the Human Rights section.  
714

## 715 **XIX. TRANSITION OF PARTICIPANTS**

716

717 The long-term aim of this study is to acquire information and share the newfound knowledge and  
718 insights with the clinical SCI Services. This information will assist the SCI Services to gain the  
719 necessary skills to develop and provide exoskeletal-assisted walking programs in-house with the  
720 anticipation of providing home prescription to interested and eligible Veterans and military  
721 members with SCI. It should be noted that before clinical staff can train patients at their facilities  
722 in the use of the exoskeleton, they will receive specific instruction/training in the use of the device.  
723

724 In addition to having a truly immediate translation to clinical care, our study will actually make  
725 possible the clinical use of the exoskeleton by training local professional staff to become  
726 sufficiently skilled in the training of Veterans and military members with SCI who wish to use this  
727 technology for upright ambulation. In summary, clinical staff at the study sites will have the  
728 opportunity to directly participate in exoskeletal training, which will provide hands-on experience  
729 that will be readily transferrable to clinical care. This study will provide important clinical  
730 information, such as who are the best candidates for home use of an exoskeleton, the average  
731 number of sessions needed to pass the advanced skills test, the level and completeness of SCI that  
732 is related to successful use of the device, how often and in what locations the exoskeletons should  
733 be used, and any unexpected adverse events or serious adverse events, if they should occur,  
734 associated with home use. The prosthetics and orthotics departments will gain the opportunity to  
735 learn about the system and how to fabricate additional padding, if needed, for participants in  
736 addition to setting up contracting for purchasing these types of devices. There are other  
737 exoskeletons which will become available. The experience that the facilities gain from  
738 participation in this study will be a basis to identify the important features these new systems may  
739 offer to improve clinical care provided to veterans with SCI. Perhaps most importantly for the  
740

clinical services, is the question of there being unexpected adverse events or serious adverse events associated with home use as well as how much is this device actually being used in the home/community environment.

**XX. IMPACT OF THE SARS-COV-2 (COVID-19) PANDEMIC ON VETERANS WITH SPINAL CORD INJURY**

This section has been added to the protocol to identify the impact of the COVID-19 pandemic on the screened participants from CS #2003. The questions to be asked are unrelated to the original research design and outcomes of CS #2003. A baseline questionnaire will be completed with screened participants as well as a follow-up questionnaire and a blood draw. These additions are at no additional cost to the study. All costs will remain budget neutral within each site. Although a budget for each site will be provided, it is understood that each site will cover these costs within the approved budget for their site.

**A. Background**

In the United States (US), the first case of the 2019 novel coronavirus disease (COVID-19), caused by the severe acute respiratory syndrome SARS-CoV-2 virus, was reported on January 19, 2020

(Holshue, et.al., NEJM March 2020). As of May 26, 2020, the US had 1,697,361 confirmed cases with 99,462 deaths and in the Veteran’s Affairs Health system, there had been 13,327 positive cases and over 1,133 deaths. The numbers of positive cases and deaths in the cities where the VA CS #2003 study sites are located is provided (Table 20).

| VA Site Location | # of Positive Cases | # of Deaths |
|------------------|---------------------|-------------|
| 1 Boston         | 12,511              | 618         |
| 2 Houston        | 10,995              | 221         |
| 3 Long Beach     | 1,582               | 73          |
| Los Angeles      | 46,018              | 2,116       |
| 4 Palo Alto      | 2,602               | 139         |
| San Francisco    | 2,386               | 40          |
| 5 Richmond       | 1,546               | 118         |
| 6 Tampa          | 1,939               | 72          |
| 7 St. Louis      | 4,690               | 387         |
| 8 Dallas         | 8,998               | 211         |
| 9 Minneapolis    | 7,168               | 539         |
| 10 Milwaukee     | 6,535               | 257         |
| 11 Albuquerque   | 1,347               | 68          |
| 12 Augusta       | 529                 | 18          |
| 13 Bronx         | 43,252              | 3,473       |
| New York City    | 203,569             | 20,740      |
| 14 Cleveland     | 3,963               | 217         |
| 15 San Antonio   | 2,449               | 69          |

There is limited information available on how Veterans with SCI have been affected by COVID-19. The most severe and direct negative impact for Veterans with SCI would be to contract COVID-19. Indirect negative impacts may also stem from the loss of caregiver or home attendant services, difficulty accessing routine healthcare, maintaining



wheelchairs, assistive and/or adaptive equipment, and other inconvenient and potentially harmful disruption of services that may be occurring. Positive indirect benefits may also be occurring, such as increased access to internet-based activities.

## **B. Rationale**

Veterans with SCI are often immunosuppressed and have chronic health conditions (e.g. cardiovascular disease, respiratory compromise, metabolic disease including diabetes mellitus) that place them at a potentially higher risk of complications and more severe symptoms should they contract COVID-19. Additionally, individuals with SCI may be debilitated from poor nutrition, experience chronic pressure injuries with or without osteomyelitis, have concurrent respiratory infections, and experience frequent urinary tract infections (UTI). Of note, individuals with higher cord lesions who have difficulty clearing secretions from their lungs because of an impaired or absent cough due to respiratory muscle weakness from paralysis are at a higher risk of developing pneumonia and its complications. The signs and symptoms of COVID-19 may be different in individuals with SCI than the general population. For example, the high fevers characteristic of COVID-19 in the general population may not be observed in persons with tetraplegia, who experience lower core body temperatures, thereby requiring a different definition of fever for symptom surveillance and clinical diagnosis. Also, the common feeling reported of chest pressure may be absent in those who are insensate in this area. Persons with respiratory compromise, may experience shortness of breath earlier in the course and decline more rapidly, an indication for earlier admission and closer surveillance.

In the Veterans Health Administration (VHA) and the Spinal Cord Injury and Disease (SCI/D) National Registry, there are 17,806 Veterans with SCI. It is not known how many Veterans with SCI are, or will be, directly infected by this virus, nor the severity of their symptoms and survival rates. However, it is anticipated that, due to their high risk of immunodeficiency and other comorbidities, the occurrence may be higher, with the potential for more severe symptoms and greater mortality than in the general population.

Additionally, of great concern, is the anecdotal report of loss of services, including routine medical care for non-COVID-related conditions (i.e. pressure injuries, urinary tract infections, etc.), loss or interruption of caregiver services, and wheelchair or assistive devices repair options, that has been an unfortunate consequence of the pandemic. Mr. James Weisman, President and CEO of

United Spinal Association, Inc. (a membership of 58,000 nationwide which includes about 1500 Veterans with SCI) stated on March 30, 2020: *“Homecare workers, always in short supply, are staying home watching their kids, self-isolating because of potential exposure--or exposure, and traveling via public transportation to patients and potentially exposing them. More than ever, it has become obvious that adequate homecare services are a fundamental necessity of the SCI community in order to stay out of nursing homes and hospitals.... And many are replacing caregivers with family members out of fear they will become infected from the caregiver”.*

**The VA Cooperative Study Program’s CS #2003 is able to use the existing study staff to conduct a baseline survey/medical chart review, a follow-up survey and a blood draw. The survey would be used to determine the participant-reported direct medical effects of COVID-19 (with the use of the medical record when and if information is available) and the indirect psychosocial and environmental impacts of**

**COVID-19 on Veterans with SCI who have been screen-consented for CS #2003.** This knowledge would provide a “snapshot” of what is occurring across the nation in Veterans with SCI and will enable us to plan to meet the immediate needs of the Veteran SCI community as the course of the pandemic becomes known across the US. This information will be important to the VHA and the SCI/D National Service to be able to better prepare for future pandemics and other natural disasters. Immediate benefit may be the identification of Veterans with SCI who are in urgent need of services. This information would be relayed back to the medical center providers. As of the date of the administrative hold for CS #2003 on March 16, 2020, more than 400 Veterans with SCI had been screened for participation across 15 VA sites. A list of the number screened by site is provided (Table 21).

| <b>Site</b>           | <b>Count</b> |
|-----------------------|--------------|
| 1 Boston              | 34           |
| 2 Houston             | 28           |
| 3 Long Beach          | 48           |
| 4 Palo Alto           | 37           |
| 5 Richmond            | 35           |
| 6 Tampa               | 41           |
| 7 St. Louis           | 34           |
| 8 Dallas              | 31           |
| 9 Minneapolis         | 34           |
| 10 Milwaukee          | 36           |
| 11 Albuquerque        | 10           |
| 12 Augusta            | 16           |
| 13 Bronx              | 11           |
| 14 Cleveland          | 15           |
| 15 San Antonio        | 13           |
| <b>Total Screened</b> | <b>423</b>   |

The infrastructure for VA CS #2003 is in place with funding on stations through September 30, 2020 and a full budget (4 staff per site at 14 sites) is requested for fiscal year (FY) 21 (Houston was withdrawn as a site in 2018, but those screened participants can be contacted by the San Antonio site staff). VA CS #2003 was put on a voluntary administrative hold on March 16, 2020. CS #2003 study staff will be trained to conduct the surveys and medical chart reviews while other

347 clinical research is on hold and to continue to conduct the surveys once the administrative hold has  
348 been lifted. The administrative hold has been lifted for the COVID-19 survey and blood draw.

349  
350 The initial phone or in-person survey serves to capture COVID-19 information from the Veterans  
351 with SCI themselves that may not be in the medical record. This survey includes SCI-specific  
352 questions related to demographics, neurological characteristics and any loss of services during the  
353 pandemic. For example, information will be recorded such as the amount of assistance provided  
354 before the pandemic, the loss or reduction in home care services since the pandemic, other  
355 potentially negative consequences, and potential positive consequences such as offering of and  
356 inclusion in more internet-based social activities or telehealth medical services. The phone survey  
357 will be the primary method of collecting the information, with the option to complete the survey  
358 in person.

359  
360 A medical chart review will be used for retrieving medical history and COVID-19 medical  
361 information when applicable (some Veterans with SCI may not be treated at their VA hospital, but  
362 rather at a local non-VA hospital, in which case this medical information may not be available to  
363 the study staff). The chart review will consist of information from the Spinal Cord Injury and  
364 Disease (SCI/D) National Office for COVID-19, using the “Coronavirus Disease 2019 SCI Screen  
365 (COVID-19 SCI Screen)” and other COVID-19-related medical records, if applicable. The  
366 medical records of Veterans with SCI may contain the COVID-19 SCI Screen information and  
367 will be recorded on the survey. Any additional medical information will be recorded as  
368 appropriate.

369  
370 A follow-up “in-person” visit to update information from the initial survey and to collect blood  
371 samples for virus testing, anti-viral antibody, and other immune analyses relevant to the COVID-  
372 19 disease will be planned at least one month after the initial survey. The antibody, cytokine, and  
373 other immunological analyses at a future date when our country has recovered from this current  
374 pandemic will be critical for determining the number of Veterans with SCI who were infected with  
375 the virus, the relationship with the signs and symptoms of infection, if any, and the rate of survival  
376 in this population sample. There will also be an option to complete the follow-up survey over the  
377 phone for participants who do not wish to travel to the local VAs. An option to complete the blood  
378 draw in the home will be available through the services of a VA contracted phlebotomist vendor,  
379 ExamOne.

380  
381 The initial survey and follow-up survey, medical chart review, and blood draw are intended to

capture the following information:

883 Questions related to the **direct impact of COVID-19** on Veterans with SCI will be collected by  
884 phone interview using Doximity. Doximity allows for a registered physician (or delegate) to log  
885 in and set a phone number, such as each local VA Medical Center who would be represented in  
886 this study. The person receiving the call sees the VA Medical Center as the caller ID. Participants  
887 will also have the option to complete the initial survey by in-person interview.

888  
889 In Veterans with SCI, the following information will be collected (but not limited to):

- 890 a) The number who are/were diagnosed with COVID-19, determined from the medical  
891 records and/or interviews;
- 892 b) The number who presented with symptoms, determined from the medical records and/or  
893 interviews;
- 894 c) The type, duration and severity of symptoms, determined from the medical records and/or  
895 interviews;
- 896 d) The number who have anti-SARS-CoV-2 antibodies, with testing to be performed at least  
897 one month after initial interview (or whenever is deemed safe for an in-person visit to the  
898 medical centers); and
- 899 e) The number and characteristics of those who survived.

900  
901 Questions related to the **indirect impact of COVID-19** pandemic on Veterans with SCI who rely  
902 on caregiver assistance and other services that may have been interrupted during the COVID-19  
903 outbreak will be determined via interview.

904  
905 The following information will be collected (but not limited to):

- 906 a) The number who report any caregiver assistance;
- 907 b) The relationship to the person(s) who provides the assistance (family, friend, aide,  
908 healthcare worker, etc.);
- 909 c) The number whose caregivers live with them;
- 910 d) The number whose caregivers travel to their homes;
- 911 e) Adverse health consequences that resulted from reduced or lack of caregiver assistance
  - 912 a. Any clinically relevant/significant health event during the study period, such as:  
913 pressure injury, UTI, fracture, or other,
  - 914 b. Lack of access to in-person medical services when requested or needed (in other  
915 words-is the overwhelmed healthcare system also affecting their more general  
916 access to care?).
- 917 b) Other adverse consequences of the COVID-19 pandemic on persons with SCI, such as:

- a. Wheelchair maintenance/repair interruption,
- b. Prescription renewal interruption,
- c. Social isolation (lack of interactions with others),
- d. Became unemployed, or
- e. Other

Questions related to the potential positive consequences of the COVID-19 pandemic would also be explored for:

- a) Participation in virtual support groups (i.e. chat groups, other)
- b) Participation in virtual exercise/physical therapy programs
- c) Participation in virtual recreation therapy programs, or
- d) Other.

Most of the survey questions have been developed with fixed-format answers, with as few open-ended questions as possible.

### **C. Methods**

Participants: Veterans with SCI who were initially screened for CS #2003 will be contacted to determine willingness to be consented for participation in the survey and medical chart review and to be consented for the follow-up survey and blood draw at least one month from the initial survey.

The goal is to interview as near to 100% of the 400 plus Veterans with SCI as possible. We believe it is possible to recruit as many as 90% (approximately n=381), but to be conservative, we are expecting 80% (approximately n=338). Eighty percent (80%) is realistic because the sites' staff already know these Veterans with SCI, many of whom would be motivated to know if they have anti-SARS-CoV-2 antibody, will have missed their annual physicals during the pandemic, and will already be scheduled, or in the process of scheduling, to visit their VAMC. (In these cases, the CS #2003 staff would coordinate with the SCI/D service whenever possible to schedule both visits at the same time.)

Baseline/Initial Survey: Two survey forms will be used to collect the medical chart information and the responses from the participant. The medical chart review contains SCI-specific questions to record SCI characteristics of the participants. The survey will also record the loss or reduction in home care services and other potentially negative or positive consequences.

053 Follow-up Visit: After the COVID-19 national crisis has subsided, a follow-up visit (at least one  
054 month after the initial survey) will be scheduled at the VA Medical Centers for any of the Veterans  
055 with SCI who participated in the initial survey. During this follow-up visit, the participant will  
056 have the option to complete a blood draw and follow-up survey. Additionally, any of the over 400  
057 Veterans with SCI who present to the VA Medical Centers who had not received the initial contact  
058 and interview would also be eligible to be interviewed in-person and for the blood draw. If  
059 participants complete the follow-up survey, they will receive a stipend of \$50. No additional  
060 funding is being requested from CSP for this stipend. All costs will remain budget neutral within  
061 each site.

062 Blood collection: A single blood draw for a total of 20.0 mL of blood for the following will be  
063 performed:  
064

- 065 1. To be analyzed at each site's local VA laboratory:
  - 066 a. One red top tube (6.0 mL) for c-reactive protein (CRP), spun down for serum and  
067 separated into 4.0 mL for the local lab and 2.0 mL to be frozen and shipped to the  
068 Chair's Office for antibody testing.
  - 069 b. One purple top tube (6.0 mL) for complete blood count with differential (CBC  
070 w/Diff) as whole blood (not spun down) for the local lab.
  - 071 c. Note: Each site will need a laboratory agreement to pay for the costs of the CBC  
072 w/Diff and CRP tests.
- 073 2. To be shipped to the Chair's Office for analyses:
  - 074 a. From the red top tube above, 2.0 mL, frozen serum for antibody testing
  - 075 b. One green top tube (5.0 mL) spun down for plasma and frozen for cytokine testing
  - 076 c. One PAX gene tube (3.0 mL) frozen as whole blood for transcriptional analysis

077  
078 If participants complete the blood draw, they will receive a stipend of \$50. No additional funding  
079 is being requested for this stipend. All costs will remain budget neutral within each site.

080  
081 There will be an option to complete the blood draw at the participant's home through services  
082 provided by a VA contracted phlebotomist vendor. The vendor, ExamOne, will only provide the  
083 blood collection service. They will not be engaged in research activities. All questions about the  
084 study (other than blood collection visit schedules and blood draw procedures) will be directed to  
085 the local site team and/or the Chair's Office. ExamOne will spin down the samples, as appropriate,  
086 and deliver them to the local site personnel for freezing or local site lab analysis.

All blood samples will be labeled with the study ID, date and a coded participant ID number. The serum and plasma of each spun down tube and the PAX gene tube with whole blood will be stored in a freezer for shipment to the James J Peters VA Medical Center, Bronx, NY (Chair’s Office). The cytokine testing will include: Interleukin-1 (normal range 0-5 pg/ml); Interleukin-6 (normal range 5-15 pg/ml); Interferon-alpha (normal range 0 to 35 U/L), Interferon-gamma (normal range <8.1 pg/mL), tumor necrosis factor (TNF)-alpha (normal range ≤ 2.8 pg/mL, and TNF-gamma (normal range <10 pg/ml).

The optimum methodology to perform the antibody analyses will be determined in consultation with the VHA Infectious Disease Service and the Clinical Laboratory at the time of sample analysis. In the future, biological values and other clinical data will be compared to other populations, including Veterans without SCI or non-Veterans with SCI.

**Timeline:** It is estimated the study staff can complete the initial surveys on screened participants by the end of September 2021. Once the medical centers have re-opened to outpatient visits, the in-person or phone visits for the follow-up surveys and in-person visits for blood draws can be completed by the end of FY21, which is within the timeframe of the completion of CS #2003. An estimated timeline is provided (Table 22).

| Table 22. Timeline                             | FY20 Q3 | FY20 Q4 |        |        | FY21 Q1 to Q4 |    |    |    |
|------------------------------------------------|---------|---------|--------|--------|---------------|----|----|----|
|                                                | Jun-20  | Jul-20  | Aug-20 | Sep-20 | Q1            | Q2 | Q3 | Q4 |
| Administrative approvals <sup>1</sup>          | ✓       |         |        |        |               |    |    |    |
| CIRB submission                                |         | ✓       |        |        |               |    |    |    |
| CIRB approval                                  |         |         |        |        | ✓             |    |    |    |
| Survey development & refinement                | ✓       | ✓       |        |        |               |    |    |    |
| iDatafax form for the survey                   |         |         | ✓      | ✓      | ✓             |    |    |    |
| Train CS #2003 staff (via Teams or other)      |         |         |        |        | ✓             |    |    |    |
| Initial surveys and chart review               |         |         |        |        |               | ✓  | ✓  | ✓  |
| Follow-up surveys, chart reviews & blood draws |         |         |        |        |               |    | ✓  | ✓  |

<sup>1</sup>CS#2003 Executive committee and CSP VACO review and approvals

**D. Relevance**

This information will be used to inform the VHA of the medical, sociological and/or quality of life impacts from the COVID-19 pandemic on Veterans with SCI who were screened for CS #2003. Specifically, for the medical impact, we will learn about the number in this sample who were



012 infected, their symptoms (if any) and severity, any associated illnesses, immunological responses,  
013 and the number of individuals who recovered and survived. The sociological and quality of life  
014 impact of this virus will also be reported, including the interruption of vital services such as  
015 caregivers, medical appointments, wheelchair repair, levels of anxiety, and other aspects. We will  
016 also learn about any positive occurrences that may be reported such as usage of telemedicine, and  
017 more access to online social groups or web-based activities. **Important benefits from this project**  
018 **will be to improve preparedness for future local and/or national disasters in order to protect**  
019 **Veterans living with SCI from untoward exposure and/or loss of services.**

020  
021 **Notes for consideration:**

- 022 • On the follow-up visit, if the participant has a positive test for anti-SARS-CoV-2 antibodies,  
023 we will know that they had the COVID-19 infection at some time in the past (and even could  
024 have been asymptomatic); these individuals would be categorized as persons who have  
025 survived. If they test negative for anti-SARS-CoV-2 antibodies, then we will know they had  
026 not been infected as of the date of the test.
- 027 • Some of the Veterans with SCI who participate in the baseline/initial survey will have already  
028 been diagnosed with viral infection and/or COVID-19 (many of our institutions already have  
029 some Veterans with SCI who have tested positive for the virus). Some Veterans with SCI are  
030 being treated for COVID-19 based on severe symptoms and may not have been tested for viral  
031 infection by lab diagnostics until after they have been treated. Other individuals with less  
032 severe symptoms, that did not require hospitalization, may not have been tested for COVID-  
033 19 using lab tests. In these cases, the antibody testing will reveal how many people with SCI  
034 in our study sample had the virus.
- 035 • If a Veteran with SCI who was screened for our study has died during this time, the information  
036 about the death may be in the medical record at that Veteran's VA medical center and we will  
037 be able to capture it from chart review. However, it is recognized that information about those  
038 who did not survive will be the most difficult to get for many reasons: lack of documentation  
039 in the medical record, lack of definitive information about the cause of death, lack of a COVID-  
040 19 diagnosis, etc.
- 041 • If a Veteran with SCI who participates in the baseline/initial survey dies at some time  
042 afterwards, then upon follow-up, we may learn about the death and be able to acquire some of  
043 this information from medical records.
- 044

- The additional workload to conduct the survey and in-person visit with the blood draw will be able to be continued without interruption to the usual tasks and duties that are required for CS #2003.

## E. Limitations

The screened participants for CS #2003 would have met the inclusion criteria for CS #2003. As such, the Veterans with SCI in this survey sample would have tended to be those with more function and, as a result, will be a biased sample. The generalizability for the results would therefore be limited to the demography of this sample.

If some, or all, of the Sites' VA medical centers have not re-opened by next year, the study staff could still complete the follow-up survey and chart reviews from telework. The survey is of value even without the blood draw since identification of adverse and/or positive aspects of the pandemic would be informative for future preparedness for Veterans with SCI.

Considerations for how the blood draws can safely take place will be discussed at that time and may include solutions such as staff in full Personal Protective Equipment (PPE) going to the Veterans home to take the blood sample.

## XXI. REFERENCES

1. Glickman, S. and M.A. Kamm, *Bowel dysfunction in spinal-cord-injury patients*. Lancet, 1996. **347**(9016): p. 1651-3.
2. Cornell, S.A., et al., *Comparison of three bowel management programs during rehabilitation of spinal cord injured patients*. Nurs Res, 1973. **22**(4): p. 321-8.
3. Korsten, M.A., et al., *Difficulty with evacuation after spinal cord injury: Colonic motility during sleep and effects of abdominal wall stimulation*. J Rehabil Res Dev, 2004. **41**(1): p. 95-100.
4. Potter, P.J., *Disordered control of the urinary bladder after human spinal cord injury: what are the problems?* Progress in brain research, 2006. **152**: p. 51-57.
5. Markman, L.J., *Bladder and bowel management of the spinal cord injured patient*. Plast Surg Nurs, 1988. **8**(4): p. 141-5.
6. Saunders, L.L. and J.S. Krause, *Behavioral factors related to fatigue among persons with spinal cord injury*. Archives of physical medicine and rehabilitation, 2012. **93**(2): p. 313-318.
7. LaVela, S., et al., *Dysfunctional sleep in persons with spinal cord injuries and disorders*. Spinal cord, 2012. **50**(9): p. 682-685.
8. Johanson, J.F., et al., *Association of constipation with neurologic diseases*. Dig Dis Sci,

1992. **37**(2): p. 179-86.
9. Stone, J.M., et al., *Chronic gastrointestinal problems in spinal cord injury patients: a prospective analysis*. Am J Gastroenterol, 1990. **85**(9): p. 1114-9.
  10. Kwok, S., et al., *Does regular standing improve bowel function in people with spinal cord injury? A randomised crossover trial*. Spinal Cord, 2015. **53**(1): p. 36-41.
  11. Michailidou, C., et al., *A systematic review of the prevalence of musculoskeletal pain, back and low back pain in people with spinal cord injury*. Disability & Rehabilitation, 2013. **36**(9): p. 705-715.
  12. Adams, M.M. and a.L. Hicks, *Spasticity after spinal cord injury*. Spinal cord, 2005. **43**: p. 577-86.
  13. Jensen, M.P., et al., *Sleep problems in individuals with spinal cord injury: frequency and age effects*. Rehabilitation psychology, 2009. **54**(3): p. 323.
  14. Fawkes-Kirby, T., et al., *Clinical correlates of fatigue in spinal cord injury*. Spinal Cord, 2007. **46**(1): p. 21-25.
  15. Spungen, A.M., et al., *Soft tissue body composition differences in monozygotic twins discordant for spinal cord injury*. Journal of Applied Physiology, 2000. **88**(4): p. 1310.
  16. Spungen, A.M., et al., *The effects of level and completeness of lesion on body composition in subjects with spinal cord injury*. J Spinal Cord Med, 1999. **22**: p. 43.
  17. Spungen, A.M., et al., *Factors influencing body composition in persons with spinal cord injury: a cross-sectional study*. J Appl Physiol, 2003. **95**(6): p. 2398-407.
  18. Wilmet, E., et al., *Longitudinal study of the bone mineral content and of soft tissue composition after spinal cord section*. Paraplegia, 1995. **33**(11): p. 674-7.
  19. Gorgey, A.S. and D.R. Gater, *Regional and relative adiposity patterns in relation to carbohydrate and lipid metabolism in men with spinal cord injury*. Appl Physiol Nutr Metab, 2011. **36**(1): p. 107-14.
  20. Bauman, W.A., et al., *The effect of residual neurological deficit on serum lipoproteins in individuals with chronic spinal cord injury*. Spinal Cord, 1998. **36**(1): p. 13-7.
  21. Bauman, W.A., et al., *The effect of residual neurological deficit on oral glucose tolerance in persons with chronic spinal cord injury*. Spinal Cord, 1999. **37**(11): p. 765-71.
  22. Bauman, A., *Carbohydrate and lipid metabolism in individuals after spinal cord injury*. Top Spinal Cord Inj Rehabil 2, 1997. **2**(4): p. 1-22.
  23. Duckworth, W.C., P. Jallepalli, and S.S. Solomon, *Glucose intolerance in spinal cord injury*. Arch Phys Med Rehabil, 1983. **64**(3): p. 107-10.
  24. Duckworth, W.C., et al., *Glucose intolerance due to insulin resistance in patients with spinal cord injuries*. Diabetes, 1980. **29**(11): p. 906-10.
  25. Bauman, W.A., et al., *Is immobilization associated with an abnormal lipoprotein profile? Observations from a diverse cohort*. Spinal Cord, 1999. **37**(7): p. 485-93.
  26. Brenes, G., et al., *High density lipoprotein cholesterol concentrations in physically active and sedentary spinal cord injured patients*. Arch Phys Med Rehabil, 1986. **67**(7): p. 445-50.
  27. Massucci, M., et al., *Walking with the advanced reciprocating gait orthosis (ARGO) in thoracic paraplegic patients: energy expenditure and cardiorespiratory performance*. Spinal cord, 1998. **36**(4): p. 223-227.
  28. Arazpour, M., et al., *Evaluation of a novel powered gait orthosis for walking by a spinal cord injury patient*. Prosthetics and orthotics international, 2012. **36**(2): p. 239-246.

29. van Hedel, H.J., *Gait speed in relation to categories of functional ambulation after spinal cord injury*. Neurorehabil Neural Repair, 2009. **23**(4): p. 343-50.
30. Waters, R.L. and B.R. Lunsford, *Energy cost of paraplegic locomotion*. J Bone Joint Surg Am, 1985. **67**(8): p. 1245-50.
31. Tefertiller, C., et al., *Efficacy of rehabilitation robotics for walking training in neurological disorders: a review*. J Rehabil Res Dev, 2011. **48**(4): p. 387.
32. Nooijen, C.F., N. ter Hoeve, and E.C. Field-Fote, *Journal of NeuroEngineering and Rehabilitation*. Journal of neuroengineering and rehabilitation, 2009. **6**: p. 36.
33. Harkema, S.J., et al., *Balance and ambulation improvements in individuals with chronic incomplete spinal cord injury using locomotor training-based rehabilitation*. Archives of physical medicine and rehabilitation, 2012. **93**(9): p. 1508-1517.
34. Forrest, G.F., et al., *Ambulation and balance outcomes measure different aspects of recovery in individuals with chronic, incomplete spinal cord injury*. Archives of physical medicine and rehabilitation, 2012. **93**(9): p. 1553-1564.
35. Roy, R.R., S.J. Harkema, and V.R. Edgerton, *Basic concepts of activity-based interventions for improved recovery of motor function after spinal cord injury*. Archives of physical medicine and rehabilitation, 2012. **93**(9): p. 1487-1497.
36. Graupe, D., et al., *Stochastically-modulated stimulation to slow down muscle fatigue at stimulated sites in paraplegics using functional electrical stimulation for leg extension*. Neurological research, 2000. **22**(7): p. 703-704.
37. Hirokawa, S., et al., *Energy expenditure and fatiguability in paraplegic ambulation using reciprocating gait orthosis and electric stimulation*. Disability & Rehabilitation, 1996. **18**(3): p. 115-122.
38. Solomonow, M., et al., *The RGO Generation II: muscle stimulation powered orthosis as a practical walking system for thoracic paraplegics*. Orthopedics, 1989. **12**(10): p. 1309-1315.
39. Durfee, W.K. and A. Rivard. *Preliminary design and simulation of a pneumatic, stored-energy, hybrid orthosis for gait restoration*. in ASME 2004 International Mechanical Engineering Congress and Exposition. 2004. American Society of Mechanical Engineers.
40. Durfee, W.K. and A. Rivard, *Design and simulation of a pneumatic, stored-energy, hybrid orthosis for gait restoration*. Journal of biomechanical engineering, 2005. **127**(6): p. 1014-1019.
41. Goldfarb, M., et al., *Preliminary evaluation of a controlled-brake orthosis for FES-aided gait*. Neural Systems and Rehabilitation Engineering, IEEE Transactions on, 2003. **11**(3): p. 241-248.
42. Petrofsky, J. and J.B. Smith, *Physiologic costs of computer-controlled walking in persons with paraplegia using a reciprocating-gait orthosis*. Archives of physical medicine and rehabilitation, 1991. **72**(11): p. 890-896.
43. Esquenazi, A., et al., *The ReWalk powered exoskeleton to restore ambulatory function to individuals with thoracic-level motor-complete spinal cord injury*. Am J Phys Med Rehabil. **91**(11): p. 911-21.
44. Zeilig, G., et al., *Safety and tolerance of the ReWalk exoskeleton suit for ambulation by people with complete spinal cord injury: a pilot study*. J Spinal Cord Med. **35**(2): p. 96-101.
45. *The ReWalk Exoskeletal Walking System for Persons With Paraplegia (ClinicalTrials.gov NCT01454570)*. 2011 September 14, 2011]; Available from:

- <http://www.clinicaltrials.gov/ct2/show/NCT01454570?term=NCT01454570&rank=1>.
46. Spungen AM, et al., *Exoskeletal-Assisted Walking for Persons with Motor-Complete Paraplegia*, in *In Force Sustainment: Rehabilitation, Regeneration and Prosthetics for Re-Integration to Duty*. 2013, North Atlantic Treaty Organization (NATO): Neuilly-sur-Seine, France: STO. p. 6-1, 6-14.
  47. Fineberg, D.B., et al., *Vertical ground reaction force-based analysis of powered exoskeleton-assisted walking in persons with motor-complete paraplegia*. The journal of spinal cord medicine, 2013. **36**(4): p. 313-321.
  48. ReWalkRobotics. Available from: <http://rewalk.com/>.
  49. Spungen AM, A.P., Fineberg D, Harel NY, Kornfeld S, Bauman WA., *Beneficial changes in body composition after exoskeletal-assisted walking: Implications for improved metabolic function* *Top. Spinal Cord Inj Rehabil*, 2013. **19**(5): p. 8-9.
  50. Asselin PK, K.S., Kornfeld S, Cirnigliaro C, Agranova-Breyter I, Bauman WA, Spungen AM., *Heart Rate and Oxygen Demand of Powered Exoskeleton-Assisted Walking in Persons with Paraplegia*. Under Review.
  51. EksoBionics. Available from: <http://www.eksobionics.com/>.
  52. RexBionics. Available from: <http://www.rexbionics.com/>.
  53. IndegoExoskeleton. Available from: <http://indegocom/indego/en/home>.
  54. Administration, F.a.D., 2014.
  55. Cella, D., et al., *The neurology quality-of-life measurement initiative*. Archives of physical medicine and rehabilitation, 2011. **92**(10): p. S28-S36.
  56. *Patient Reported Outcomes Measurement Information System (PROMIS). Dynamic Tools to Measure Health Outcomes from the Patient Perspective* Available from: <http://www.nihpromis.org>.
  57. *Quality of Life in Neurological Disorders (Neuro-QOL)*. Available from: <http://www.neuroqol.org>.
  58. *PROMIS Instrument Development and Psychometric Evaluation Scientific Standards*. 2012; Available from: [http://www.nihpromis.org/Documents/PROMIS\\_Standards\\_050212.pdf](http://www.nihpromis.org/Documents/PROMIS_Standards_050212.pdf).
  59. Kisala, P.A. and D.S. Tulsy, *Opportunities for CAT applications in medical rehabilitation: development of targeted item banks*. Journal of applied measurement, 2009. **11**(3): p. 315-330.
  60. Tulsy DS, K.P., Victorson D, Choi S, Gershon R, Heinemann AW, Cella DF, *Methodology and Calibration of Item Banks to Measure Patient Reported Outcomes Following Spinal Cord Injury*. . Journal of Spinal Cord Medicine., Under review.
  61. Tulsy DS, K.P., Vivtorson D, Tate DG, Heinemann AW, Charlifue S, Kirshblum SC, Fyffe D, Gershon R, Spungen AM, Bombardier CH, Dyso-Hudson TA, Amt,mann D, Kalpakjian C, Choi S, Jette A, Forchheimer M, Cella DF *Overview of the Spinal Cord Injury – Quality of Life (SCI-QOL) Measurement System*. Submitted to the Journal of Spinal Cord Medicine. .
  62. Heinemann, A.W., et al., *Measurement Properties of the Spinal Cord Injury-Functional Index (SCI-FI) Short Forms*. Archives of physical medicine and rehabilitation, 2014.
  63. Jette, A.M., et al., *Development and initial evaluation of the spinal cord injury-functional index*. Archives of physical medicine and rehabilitation, 2012. **93**(10): p. 1733-1750.
  64. Tulsy, D.S., N.E. Carlozzi, and D. Cella, *Advances in outcomes measurement in rehabilitation medicine: Current initiatives from the National Institutes of Health and the*

- 222 *National Institute on Disability and Rehabilitation Research. Archives of physical*  
223 *medicine and rehabilitation, 2011. 92(10): p. S1-S6.*
- 224 65. Tulskey, D.S., et al., *Spinal cord injury-functional index: item banks to measure physical*  
225 *functioning in individuals with spinal cord injury. Archives of physical medicine and*  
226 *rehabilitation, 2012. 93(10): p. 1722-1732.*
- 227 66. Tulskey, D.S., et al., *Developing a contemporary patient-reported outcomes measure for*  
228 *spinal cord injury. Archives of physical medicine and rehabilitation, 2011. 92(10): p.*  
229 *S44-S51.*
- 230 67. Tulskey, D.S. and M. Rosenthal, *Quality of life measurement in rehabilitation medicine:*  
231 *building an agenda for the future. Archives of physical medicine and rehabilitation,*  
232 *2002. 83: p. S1-S3.*
- 233 68. Tulskey, D., Kisala, PA, Victorson, D, Tate, DG, Heinemann, AW, Charlifue, S,  
234 Kirshblum, SC, Fyffe, D, Gershon, R, Spungen, AM, Bombardier, CH, Dyson-Hudson,  
235 TA, Amtmann, D, Kalpakjian, C, Choi, S, Jette, A, Forchheimer, M, & Cella, DF. ,  
236 *Overview of the Spinal Cord Injury – Quality of Life (SCI-QOL) Measurement System. .*  
237 *Journal of Spinal Cord Medicine, 2015: p. In press.*
- 238 69. Buysse, D.J., et al., *Development and validation of patient-reported outcome measures*  
239 *for sleep disturbance and sleep-related impairments. Sleep, 2010. 33(6): p. 781.*
- 240 70. Yu, L., et al., *Development of short forms from the PROMIS™ sleep disturbance and*  
241 *sleep-related impairment item banks. Behavioral sleep medicine, 2012. 10(1): p. 6-24.*
- 242 71. Sloan, J.A., D. Cella, and R.D. Hays, *Clinical significance of patient-reported*  
243 *questionnaire data: another step toward consensus. Journal of clinical epidemiology,*  
244 *2005. 58(12): p. 1217-1219.*
- 245 72. Hooker, S.P. and C.L. Wells, *Effects of low- and moderate-intensity training in spinal*  
246 *cord-injured persons. Med Sci Sports Exerc, 1989. 21(1): p. 18-22.*
- 247 73. Jacobs, P.L., et al., *Relationships of oxygen uptake, heart rate, and ratings of perceived*  
248 *exertion in persons with paraplegia during functional neuromuscular stimulation assisted*  
249 *ambulation. Spinal Cord, 1997. 35(5): p. 292-8.*
- 250 74. Jenkinson, C., A. Coulter, and L. Wright, *Short form 36 (SF36) health survey*  
251 *questionnaire: normative data for adults of working age. BMJ: British Medical Journal,*  
252 *1993. 306(6890): p. 1437.*
- 253 75. Lucke, K.T., et al., *Quality of life in spinal cord injured individuals and their caregivers*  
254 *during the initial 6 months following rehabilitation. Quality of Life Research, 2004.*  
255 *13(1): p. 97-110.*
- 256 76. Westgren, N. and R. Levi, *Quality of life and traumatic spinal cord injury. Archives of*  
257 *physical medicine and rehabilitation, 1998. 79(11): p. 1433-1439.*
- 258 77. Kazis, L.E., *The veterans SF-36 health status questionnaire: development and*  
259 *application in the Veterans Health Administration. Medical Outcomes Trust Monitor,*  
260 *2000. 5(1): p. 1-2.*
- 261 78. Kazis, L.E., et al., *Patient-reported measures of health: the Veterans Health Study. The*  
262 *Journal of ambulatory care management, 2004. 27(1): p. 70-83.*
- 263 79. Kazis, L.E., et al., *Health-related quality of life in patients served by the Department of*  
264 *Veterans Affairs: results from the Veterans Health Study. Archives of Internal Medicine,*  
265 *1998. 158(6): p. 626-632.*
- 266 80. Johns, M.W., *A new method for measuring daytime sleepiness: the Epworth sleepiness*  
267 *scale. sleep, 1991. 14(6): p. 540-545.*

268  
269  
270  
271  
272  
273  
274  
275  
276

81. Kleinman, L., et al., *Psychometric evaluation of the fatigue severity scale for use in chronic hepatitis C*. *Quality of Life Research*, 2000. **9**(5): p. 499-508.
82. Krupp, L.B., et al., *The fatigue severity scale: application to patients with multiple sclerosis and systemic lupus erythematosus*. *Archives of neurology*, 1989. **46**(10): p. 1121-1123.
83. Esquenazi, A., *New Bipedal Locomotion Option for Individuals with Thoracic Level Motor Complete Spinal Cord Injury*. *Journal of the Spinal Research Foundation*, 2013. **8**(1): p. 26-28.

## STATISTICAL ANALYSIS PLAN (SAP)

### I. INTRODUCTION

“Exoskeletal-Assisted Walking (EAW) in Persons with SCI: Impact on Quality of Life” (CS #2003), is a two-group, randomized clinical trial to compare wheelchair use as standard of care (SOC) for home and community mobility to an exoskeletal-assisted walking device (EAW) plus SOC (EAW+SOC) in veterans with chronic spinal cord injury (SCI) of greater than six months, for clinically meaningful improvements in quality of life (QOL) outcomes. Overall, the study will enroll 160 participants from 10 sites over a total recruitment period of three years. Enrollment will be accomplished by using a staggered start approach: six sites will be brought up in the first year with the remaining four coming on board a year later.

There are two primary outcome measures in this study: the first is the score on the Mental Component Summary of the Veterans Rand-36 (MCS/VR-36) and the second is the sum T-score for the SCI-QOL Physical Medical Health domain (three item banks for bladder management difficulties, bowel management difficulties and pain interference). The primary study hypotheses are: 1) 33% of the intervention group (EAW+SOC) compared with 10% of the control group (SOC) will demonstrate a clinically relevant change (improvement) of  $\geq 4.0$  points in the MCS/VR-36, for greater vitality and social functioning, and improved role-emotional and mental health, from baseline to the end of the intervention phase, and 2) 42% of the intervention group compared with 10% of the control group will demonstrate a clinically significant improvement from baseline of  $\geq 10\%$  in the sum T score, indicating improvement in patient reported outcomes for SCI-QOL bladder management, bowel management and pain interference.

A major secondary objective of the study is to demonstrate that participants who use the exoskeleton in addition to SOC (EAW+SOC) will have at least a 1.0 kg loss in total body fat mass by the end of the four-month intervention compared to those who receive SOC only. Other secondary objectives are to demonstrate that participants in the EAW+SOC group will have greater net improvements than participants in the SOC only group in the following outcomes: 1) Global Impression of Change (participant- and companion-rated), 2) disturbed sleep as measured by the T-score of the Patient Reported Outcomes Measurement Information System (PROMIS) Sleep Disturbance, 3) self-reported methods and measures of bowel function, 4) sum T scores of the SCI Functional Index (SCI-FI) physical function item banks, 5) sum T scores of the SCI-QOL Emotional domain, 6) sum T scores of the SCI-QOL Social Participation domain, 7) lipid profile for high density lipoprotein cholesterol (HDL-c), low density lipoprotein cholesterol (LDL-c), triglycerides (TG), and total cholesterol (TC), and 8) fasting plasma glucose (FPG) and insulin (FPI) levels for calculation of Homeostasis Model of Assessment-Insulin Resistance (HOMA-IR).

### II. SAMPLE SIZE

Using preliminary data generated from the Exoskeletal-assisted Walking Program at the James J. Peters VA Medical Center, three separate power calculations were performed, one for each of the primary outcome measures, the MCS/VR-36 and the sum t-score of the SCI-QOL bladder, bowel and pain item banks, and one for the major secondary measure, total body fat mass. The sample size estimates are based on the



preliminary data from these three outcome measures as a proportion of participants who achieved a clinically significant change score (MCS/VR-36 and Total Body Fat Mass) or a clinically significant percent change (SCI-QOL PMH). Assuming the proportion in the control group achieving a clinically meaningful change to be 10% (or 0.100) for all three outcome measures, and estimating the attrition rate at 15%, the sample sizes range from a low of 71 per group (95% power) for the SCI-QOL PMH outcome to a high of 79 per group (80% power) for the MCS/VR-36 group. As a note about Table 1, to adjust for multiple outcome measures, a significance level of 0.025 was used in the sample size calculations for the co-primaries (MCS/VR-36 and SCI-QOL) and also for the major secondary outcome measure (Total Body Fat Mass). Based on the sample size and power calculations below, the study will enroll a total sample size of 160 participants, 80 per group.

| <b>Table 1: Sample Size/Power Calculations</b>                                                 |                  |                      |                            |
|------------------------------------------------------------------------------------------------|------------------|----------------------|----------------------------|
| Two group continuity corrected $\chi^2$ test of equal proportions (odds ratio = 1) (equal n's) | <b>MCS/VR-36</b> | <b>SCI-QOL (PMH)</b> | <b>Total Body Fat Mass</b> |
| <b>Test significance level, <math>\alpha</math></b>                                            | 0.025            | 0.025                | 0.025                      |
| <b>1 or 2 sided test?</b>                                                                      | 2                | 2                    | 2                          |
| <b>Control proportion, <math>\pi_1</math></b>                                                  | 0.100            | 0.100                | 0.100                      |
| <b>Intervention proportion, <math>\pi_2</math></b>                                             | 0.333            | 0.420                | 0.350                      |
| <b>Odds ratio, <math>\psi = \pi_2 (1 - \pi_1) / [\pi_1 (1 - \pi_2)]</math></b>                 | 4.493            | 6.517                | 4.846                      |
| <b>Power (%)</b>                                                                               | 80               | 95                   | 85                         |
| <b>n per group</b>                                                                             | 67               | 60                   | 66                         |
| <b>n per group with 15% attrition</b>                                                          | 79               | 71                   | 78                         |

### III. FEASIBILITY PHASE

In order to confirm the hypothesized control proportion for the two primary and major secondary outcomes, to determine the feasibility of recruiting 8 participants per site per year, and to assess other operational aspects of the study, a feasibility phase has been built into this study. The planned duration of the feasibility phase of the study is one year. Six out of ten planned sites (including five sites that are designated CSP NODES) will be brought up in the first year.

During the feasibility phase, several site start-up activities and operational aspects of the study will be examined. These activities will include the hiring of site personnel (including classification of position descriptions, position announcements and recruitment), the processes for procuring and distributing the ReWalk and iDXA devices to the sites, the methods by which site staff are trained on the use of the devices and on data collection and management activities, the number of sessions needed for participants in the intervention group to pass the Advanced Skills Test, the practicality of Veterans with SCI to find motivated and eligible walking companions, and attrition (drop-out) rates. The lessons learned during this phase will be implemented during activation of the remaining participating sites.

481 Recruitment rates at the six active sites will be closely monitored during this phase. The initial six sites are  
482 each expected to enroll 8 participants in the first year of the study, for a total of 48 participants at the end of  
483 the first year. The actual recruitment experience of the six sites in the first year will be used to revise the  
484 projected recruitment rate for the remainder of the study and may lead to a lengthening or shortening of the  
485 total recruitment period, as appropriate.

486 Besides the verification of the assumed recruitment rate and other site start-up activities, the feasibility phase  
487 also provides an opportunity to assess the assumed success rates in the control (SOC) group. As stated above  
488 in section II, we have hypothesized that 10% (0.100) of the control group will have a clinically meaningful  
489 change in the outcome measures for sample size/power calculations. Ten percent is thought to be a  
490 conservative estimate as there is no reason to expect the control group to have clinically meaningful changes  
491 in quality of life measures or in total body fat mass while continuing to receive SOC for their spinal cord injury.  
492 However, as a means of verifying the control proportion of 10% (or 0.100), the proportion of participants  
493 considered successful in the control group for all three outcomes and 95% confidence intervals for the  
494 proportions will be reviewed upon the completion of 25% (40) of the randomized participants. Based on the  
495 extensive experience with this population it is highly unlikely that the assumed success rates in the control  
496 group (SOC) will be any higher than the assumed 10%.

498 At the completion of the feasibility phase, the study will be moved to a continuation phase where the remaining  
499 sites (4 remaining sites) will be activated, and the remaining participants (120 remaining participants) will be  
500 recruited and followed up unless very different (much higher than 10%) success rates in the control group are  
501 observed.  
502

#### 503 504 505 IV. BASELINE COMPARABILITY

506 Baseline comparability between the treatment groups will be evaluated with respect to such variables as  
507 demographics (e.g., age, gender, and race) and baseline values of outcome measures (MCS/VR-36, SCI- QOL,  
508 total body fat mass, etc.). Chi-square and analysis of variance techniques, as appropriate, will be used to  
509 determine any differences in distribution of the variables across the treatment groups. Any variable that  
510 appears to be different between the groups ( $p < 0.10$ ) will be considered as a potential covariate in statistical  
511 analyses.  
512

#### 513 514 515 V. GENERAL OUTCOME ANALYSIS GUIDELINES

516 All statistical tests will be 2-sided. The two primary and major secondary outcome measures will be tested at  
517 a 0.025 level of significance. Because of the large number of secondary outcomes to be analyzed, all other  
518 secondary outcomes will be tested at a significance level of 0.01 to maintain control over Type I error. SAS  
519 9.4 will be used to conduct all the statistical analyses. A variety of analytic methods will be used for the primary  
520 endpoints, secondary endpoints and other analyses.  
521

## VI. ANALYSIS OF PRIMARY AND MAJOR SECONDARY OUTCOME MEASURES

The primary analysis will be based on an intent-to-treat (ITT) model. All participants who are randomized will be included for both groups, whether they are study completers (participants who complete the study through the four-month intervention phase) or early terminators (drop-outs). In order to test the hypotheses for the primary and major secondary outcome measures, each randomized participant will be deemed a success or failure at attaining: 1)  $\geq 4.0$  point improvement in the MCS of the VR-36, 2)  $\geq 10\%$  improvement in the SCI-QOL bladder management difficulties, bowel management difficulties and pain interference sum T score, and 3)  $\geq 1$  kg. total body fat mass loss. For each of the outcomes, the proportion of participants successful at achieving a clinically significant improvement will be compared between the two groups (Intervention vs. Control) using a chi-square analysis. These will constitute the primary and major secondary efficacy analyses. Participants who drop out will be treated as failures. As such, by design, there will be no missing data: participants either meet the outcome criteria (successes), do not meet these criteria (failures) or they drop out (also failures).

## VII. SECONDARY ANALYSES

In addition to the primary analysis, several secondary analyses will be performed and are described below.

- A. Analyses will be performed that include only those participants who complete the study (excluding drop-outs):
  1. Chi-square analyses of the primary and major secondary outcome measures (proportion of successes) will be repeated for only those participants who complete the 4-month intervention phase.
  2. Analyses of the MCS/VR-36, SCI-QOL, total body fat mass loss, Global Impression of Change and other secondary outcome measures will include comparisons of the mean difference scores (change from baseline to the end of the intervention phase) of these outcome variables using t-tests.
- B. Interim time points of data collection for all outcome variables have been incorporated into the study design. These time points are: baseline, five-session EAW Basic Skills Test, after training/orientation phase, two months into the intervention phase, and then again after four months of the intervention phase (primary and major secondary outcomes main time point). Secondary analyses of the MCS/VR-36, SCI-QOL, total body fat mass loss, Global Impression of Change and other secondary outcome measures will include comparisons of the mean difference scores (change from baseline to the end of each time point) of these outcome variables using t-tests. Other secondary analyses of outcome measures will be performed that use all data available. For these continuous variables, repeated measures analysis of covariance will be used to analyze them, with baseline scores, plus any variables determined from the baseline comparisons, being used as covariates in the analyses. SAS MIXED and GENMOD procedures, which allow for the use of incomplete data sets, will be used if it can be safely assumed that missing data are missing at random. If this assumption is not valid, a multiple imputation strategy of the missing responses will be implemented which does not rely on the

562 assumption that missing data occur at random. This will allow an intent-to-treat approach for the  
563 statistical analyses, where complete cases are not required.

- 564 C. An analysis to determine the characterization of the drop-outs will be performed by using descriptive  
565 and correlation statistics. The reasons for drop-out and the number of sessions/time points completed  
566 will be described. A correlation analysis will be performed with the reasons for drop-out and the  
567 demographic variables and other potential variables to identify characteristics of persons who drop out  
568 of the study.

## 571 VIII. MONITORING OF STUDY BY STUDY GROUP AND EXECUTIVE COMMITTEE

572 The Study Group (all of the Site Investigators) and Executive Committee will meet 6 to 9 months after patient  
573 recruitment begins and at annual intervals thereafter until the end of the study. Three weeks prior to these  
574 meetings and at 6-month intervals between the meetings, these groups will be provided a report that will allow  
575 them to assess study progress. Since both groups are composed of study participants, no outcome data will be  
576 provided in these reports. The information provided will include data on:

- 578 A. Screening, enrollment and retention  
579 B. Patient background characteristics at entry  
580 C. Data quality and protocol adherence.  
581  
582

### 583 A. Screening, Enrollment and Retention

584 During the pre-screening phase of the study, potential participants will be first contacted by the Site  
585 Investigator through chart reviews, other physician referrals and/or pre-existing knowledge about their  
586 patients. Eligible and interested potential participants will be contacted by the Site ReWalk Trainers and/or  
587 Site Study Coordinators for initiation of the consenting process and the screening and baseline evaluations.  
588 Any participant who consents to the study and passes all screening and baseline evaluations is eligible to be  
589 randomized into the study.  
590  
591

592 The progress of patient accrual will be presented to the monitoring groups in three formats. Table 2 gives the  
593 first format, which presents, by site, the actual number of patients entered into the study, the expected number  
594 of patients to be entered at the time of the report, and the percent of expected that were entered. The table will  
595 allow the Executive Committee to determine which sites are not recruiting as expected and the Site  
596 Investigators to see how their sites are doing in comparison to the others. The second format, Table 3, shows  
597 the number of participants entered into the study by month. Again these data will be organized by site. This  
598 table will indicate if recruitment is improving or worsening over time at the various sites. Sites where intake  
599 is worsening can be detected and the Site Investigator contacted to identify the reason for the recruitment  
600 deficit.  
601

**TABLE 2. CS #2003 Number of Participants Randomized vs. Expected**

| Site         | Number Randomized | Number Expected | Percent of Expected |
|--------------|-------------------|-----------------|---------------------|
| 1            |                   |                 |                     |
| 2            |                   |                 |                     |
| 3            |                   |                 |                     |
| 4            |                   |                 |                     |
| 5            |                   |                 |                     |
| 6            |                   |                 |                     |
| 7            |                   |                 |                     |
| 8            |                   |                 |                     |
| 9            |                   |                 |                     |
| 10           |                   |                 |                     |
| <b>Total</b> |                   |                 |                     |

**TABLE 3. CS #2003 Number of Participants Entered Each Month by Site**

| Month          | Site 1 | Site2 | ... | Site 10 | Total |
|----------------|--------|-------|-----|---------|-------|
| June 2016      |        |       |     |         |       |
| July 2016      |        |       |     |         |       |
| August 2016    |        |       |     |         |       |
| September 2016 |        |       |     |         |       |
| .              |        |       |     |         |       |
| .              |        |       |     |         |       |
| .              |        |       |     |         |       |
| <b>Total</b>   |        |       |     |         |       |

Finally, the intake data will be plotted over time for the total number of participants recruited as in Figure 1. An expected intake line is given for comparison purposes, assuming a staggered start of sites: 6 sites enrolling 48 participants in the first year of recruitment, the full complement of 10 sites enrolling during the second year of recruitment (80 participants) and 4 sites enrolling 32 participants during the third year, for a total of 160 participants randomized.

518  
519  
520  
521  
522  
523  
524  
525  
526  
527  
528  
529  
530  
531  
532  
533  
534  
535  
536

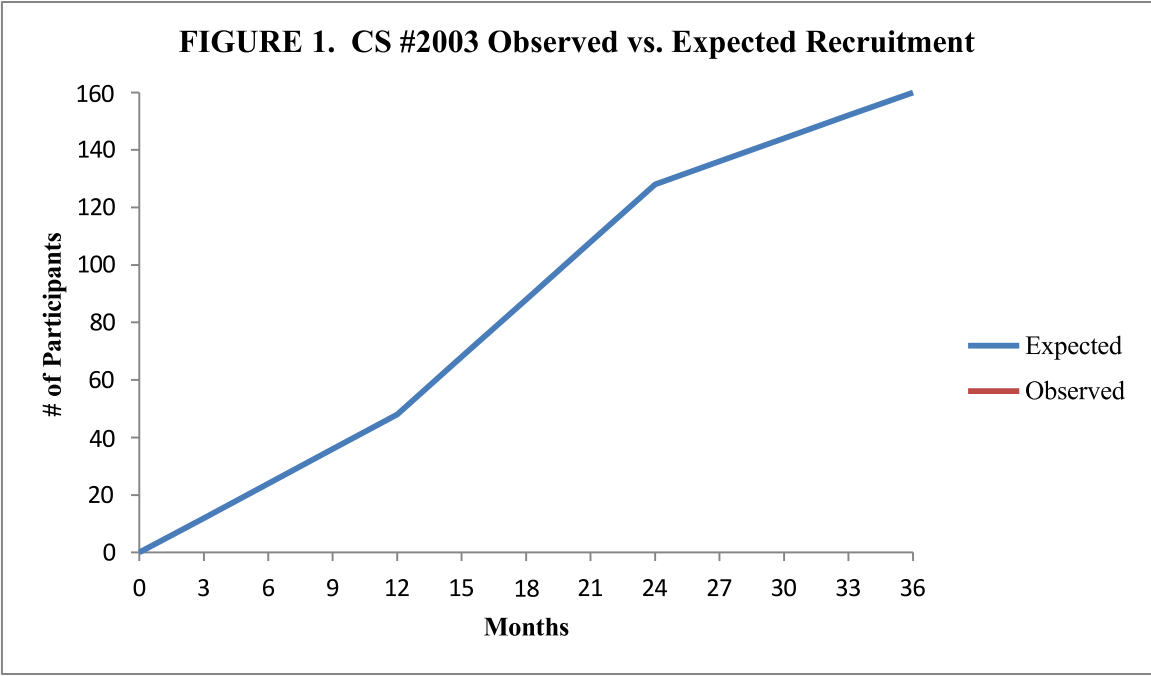

537  
538  
539  
540  
541  
542

The number of participants screened and the number of those that randomize in the study will be presented in Table 4. The reasons for the exclusion of screened participants will be presented in Table 5.

**TABLE 4. CS #2003 Cumulative Screening Summary: All Participants by Site**

| Site         | Screened | Excluded | Randomized | % Excluded |
|--------------|----------|----------|------------|------------|
| 1            |          |          |            |            |
| 2            |          |          |            |            |
| 3            |          |          |            |            |
| .            |          |          |            |            |
| .            |          |          |            |            |
| 10           |          |          |            |            |
| <b>Total</b> |          |          |            |            |

543

544 **TABLE 5. CS #2003 Summary of Ineligibility: Primary Reason for Exclusion, All Sites**  
 545

| Primary Reason for Exclusion                                           | # Screened | # Excluded | % of Screened |
|------------------------------------------------------------------------|------------|------------|---------------|
| Less than 18 years of age                                              |            |            |               |
| Duration of SCI less than 6 months                                     |            |            |               |
| .                                                                      |            |            |               |
| .                                                                      |            |            |               |
| .                                                                      |            |            |               |
| No companion to assist at home                                         |            |            |               |
| Inability to provide informed consent                                  |            |            |               |
| Diagnosis of neurological injury other than SCI                        |            |            |               |
| Progressive condition likely to result in changing neurological status |            |            |               |
| .                                                                      |            |            |               |
| .                                                                      |            |            |               |
| .                                                                      |            |            |               |
| Psychopathology documentation that may conflict with study objectives  |            |            |               |
| Pregnancy or women planning to become pregnant during study            |            |            |               |
| <b>Total</b>                                                           |            |            |               |

546  
 547  
 548  
 549  
 550 **B. Background Characteristics at Entry**

551 Background characteristics of study participants are collected on the Screening/Baseline and History &  
 552 Physical Forms. Tables summarizing the important background characteristics by site will be prepared and  
 553 submitted to the Study Group so they will have an idea of the population being studied and comparisons of  
 554 enrollment among the sites can be made. This information will be presented as means and medians for  
 555 continuous variables and as frequency tables for discrete variables. Table 6 shows how the continuous variable  
 556 age will be presented. Other variables that will routinely be presented will include gender, race,  
 557

558 education and smoking history. Analysis of variance and chi-square techniques will be used to identify any  
559 statistically significant differences that may exist among the sites.

560  
561  
562 **TABLE 6. CS #2003 Age Statistics by Site**  
563

| Site         | N | Mean (Years) | Standard Deviation | Median |
|--------------|---|--------------|--------------------|--------|
| 1            |   |              |                    |        |
| 2            |   |              |                    |        |
| .            |   |              |                    |        |
| .            |   |              |                    |        |
| .            |   |              |                    |        |
| 10           |   |              |                    |        |
| <b>Total</b> |   |              |                    |        |

564  
565  
566 **C. Data Quality and Protocol Adherence**

567 The final type of information that will be given to the Site Investigators is data that will allow them to assess  
568 the quality of the data being submitted as well as how well the sites are adhering to the protocol. These data  
569 will be given by site, so sites performing substantially below average can be identified and remedial action  
570 taken to improve their performance.  
571

572 One piece of information that will be routinely provided is the number of forms that are missing according to  
573 the participant's testing and training schedule. Table 7 indicates how this information will be displayed.  
574

575 In addition to the tables for the reports, the computer auditing system produces Quality Control (QC) reports  
576 that indicate the number of errors that were found on the individual forms. QC reports that are overly large  
577 will identify those sites requiring additional training on forms completion. A monthly report summarizing data  
578 submission and problem identification for each site will be sent to the Study Chairperson so that she can  
579 monitor how the participating sites are doing.  
580



581  
582

**TABLE 7. CS #2003 Number of Missing Forms by Site**

| # of Participants |   | Site |   |     |    | Total |
|-------------------|---|------|---|-----|----|-------|
|                   |   | 1    | 2 | ... | 10 |       |
| Form 01           | N |      |   |     |    |       |
|                   | % |      |   |     |    |       |
| Form 02           | N |      |   |     |    |       |
|                   | % |      |   |     |    |       |
| .                 |   |      |   |     |    |       |
| .                 |   |      |   |     |    |       |
| .                 |   |      |   |     |    |       |
| Form X            | N |      |   |     |    |       |
|                   | % |      |   |     |    |       |

583  
584  
585

**IX. STUDY MONITORING BY THE DATA MONITORING COMMITTEE (DMC)**

586  
587  
588  
589  
590  
591

An independent oversight committee called the Data Monitoring Committee (DMC) will monitor study progress. This committee meets on the same basic schedule as the Study Group and Executive Committee, i.e., they will meet at 6 to 9 months after the start of patient recruitment and yearly thereafter. This committee does not usually meet during the last six months of a study. They will also meet once prior to the study startup to acquaint themselves with the study and to establish their procedures for reviewing and monitoring the study.

592  
593  
594  
595  
596  
597  
598  
599  
700

The major responsibility for the DMC members when they meet is to make a recommendation to the Director of the Cooperative Studies Program as to whether or not the study should continue. The study could be recommended for termination due to poor recruitment, treatment differences so large that it is possible to reach a final decision or treatment differences so small that continuation would be irresponsible. The DMC also reviews the participating sites' performance and makes recommendations concerning them. Data collected during the feasibility phase of the study, including site performance, verification of success rates in the control group and other operational measures, will be presented to the committee for its review and recommendations. Their final responsibility is to review all proposed protocol changes and sub-protocols and to make recommendations about their acceptability.

701  
702  
703  
704  
705  
706  
707  
708

For the DMC to carry out its responsibilities, the CSPCC Study Team will provide the committee with a report approximately three weeks prior to their meetings. The report will consist of the tables described previously for the Study Group and Executive Committee reports as well as those presenting baseline participant characteristics and outcome measures by treatment group. Differences between treatment groups on participant characteristics may indicate a need to use any significantly different characteristics as covariates for the outcome measures. Formal testing of the differences between treatment groups will be done at the study's conclusion. Analyses of variance techniques will be used to test characteristics that are

continuous in nature, while chi-square techniques will be used for the discrete variable characteristics. The analyses of the primary and major secondary outcome measures are described above in section V. The results of these analyses will be provided in table format and will include the p-value from the chi-square analysis. Table 8 indicates how the MCS/VR-36 outcome measure will be displayed. Analyses of the SCI- QOL Physical Medical Health domain (three item banks for bladder management difficulties, bowel management difficulties and pain interference) and total body fat mass outcome measures will be presented in a similar fashion.

**Table 8. CS #2003 Primary Outcome Measure: Mental Component Summary (MCS) of the VR-36**

| ≥ 4-point improvement in MCS/VR-36 from baseline to end of 4-month intervention | SOC |   | EAW + SOC |   | Total |   | p-value |
|---------------------------------------------------------------------------------|-----|---|-----------|---|-------|---|---------|
|                                                                                 | n   | % | n         | % | n     | % |         |
| Success                                                                         |     |   |           |   |       |   |         |
| Failure                                                                         |     |   |           |   |       |   |         |
| Total                                                                           |     |   |           |   |       |   |         |

Secondary outcome measures and analyses (as outlined in section VI above) will also be provided in tabular format. These tables will present statistics for the outcome variables at all the time points at which the outcome measures are assessed: baseline, after the 5-session EAW Basic Skills Test, after the training/orientation Phase, two months into the 4-month intervention phase, and then again at the end of the intervention phase. Again, using the MCS/VR-36 as an example, Table 9 indicates how these data may be presented. The p-values from the comparison of the difference scores (difference from baseline to the end of each time point) and from the mixed models analyses, as appropriate, will also be presented in these tables.

**Table 9. CS #2003: VR-36 Mental Component Summary (MCS) Scores**

| Time Point                         | SOC |      |           |        | EAW + SOC |      |           |        |
|------------------------------------|-----|------|-----------|--------|-----------|------|-----------|--------|
|                                    | N   | Mean | Std. Dev. | Median | N         | Mean | Std. Dev. | Median |
| Baseline                           |     |      |           |        |           |      |           |        |
| Post-EAW Basic Skills Test         |     |      |           |        |           |      |           |        |
| Post-Training/Orientation          |     |      |           |        |           |      |           |        |
| Two Months into Intervention Phase |     |      |           |        |           |      |           |        |
| Post-Intervention Phase            |     |      |           |        |           |      |           |        |

For the DMC to make its recommendation for continuation of the study, it will be necessary for them to see the analysis of the primary and major secondary outcome measures every time they are provided a report of study progress and it is possible to calculate these measures. Periodic monitoring of interim results can significantly affect the probability of making an incorrect decision (Type-I error rate). One interim look at the primary outcome measures (in addition to the final “look” at study’s end) will be proposed to the DMC for making the recommendation about whether or not to continue the trial or to stop for early efficacy. It is

proposed that the one look occur when 80 (50%) patients have completed participation in the study. The O'Brien-Fleming method for alpha spending and rejection/acceptance boundaries will be suggested for Type-I error rate control. The O'Brien-Fleming boundaries for rejection ( $\alpha$ ) and acceptance ( $\beta$ ) as well as the Type-I error rates for the two looks are given in Tables 10 and 11 for the MCS/VR-36 and SCI-QOL/PMH outcomes, respectively. The boundaries are presented graphically in Figures 2 and 3 for the two primary outcome measures.

**Table 10. CS #2003: Two-sided O'Brien-Fleming Boundaries for Rejection ( $\alpha$ ) and Acceptance ( $\beta$ ) – MCS/VR-36**

| Interim Look (Stage) | No. of Randomized Participants | Std. z (Rejection) |         | Std. z (Acceptance) |         | Type-I error |
|----------------------|--------------------------------|--------------------|---------|---------------------|---------|--------------|
|                      |                                | Lower              | Upper   | Lower               | Upper   |              |
| 1                    | 80                             | -3.12376           | 3.12376 | -0.88945            | 0.88945 | 0.00089      |
| 2                    | 160                            | -2.20883           | 2.20883 | -2.20883            | 2.20883 | 0.01250      |

**Figure 2. CS #2003 Combined Boundary Plot for MCS/VR-36**

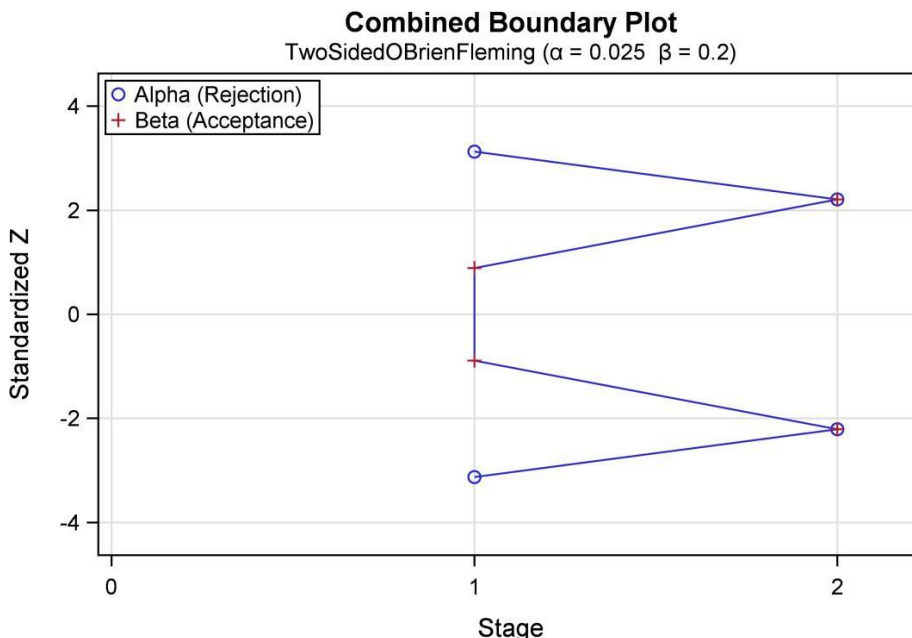

754 **Table 11. CS #2003: Two-sided O'Brien-Fleming Boundaries for Rejection ( $\alpha$ ) and Acceptance ( $\beta$ ) –**  
 755 **SCI-QOL Physical Medical Health (PMH) domain**  
 756  
 757  
 758

| Interim Look (Stage) | No. of Randomized Participants | Std. z (Rejection) |         | Std. z (Acceptance) |         | Type-I error |
|----------------------|--------------------------------|--------------------|---------|---------------------|---------|--------------|
|                      |                                | Lower              | Upper   | Lower               | Upper   |              |
| 1                    | 80                             | -3.16956           | 3.16956 | -0.40071            | 0.40071 | 0.00076      |
| 2                    | 160                            | -2.24122           | 2.24122 | -2.24122            | 2.24122 | 0.01250      |

759  
 760  
 761  
 762 **Figure 3. CS #2003 Combined Boundary Plot for SCI-QOL Physical Medical Health (PMH) Domain**  
 763  
 764  
 765

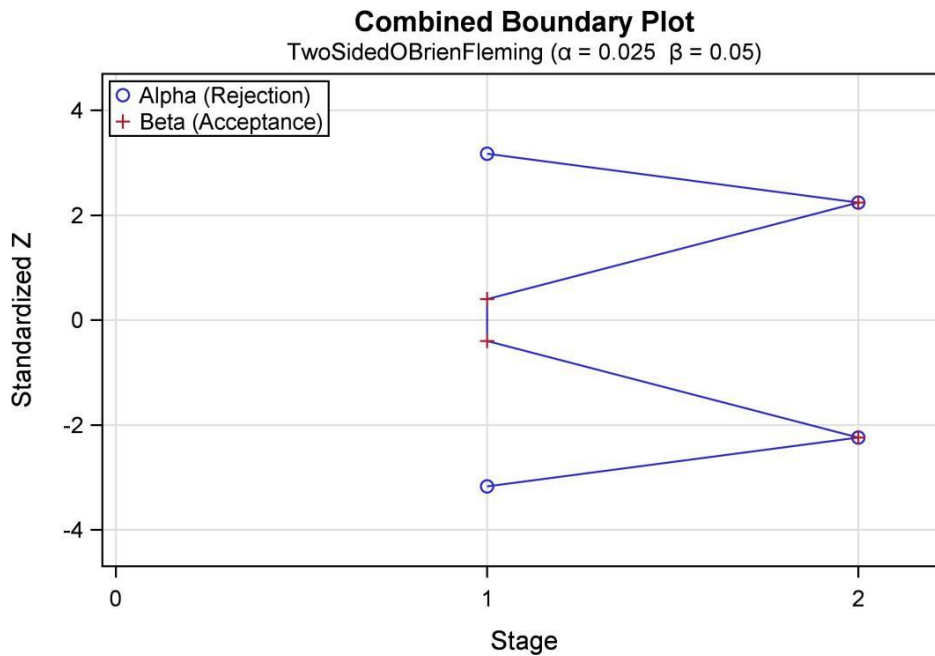

766 As with any clinical trial, the safety of the participants will be of utmost concern. Safety will be monitored  
 767 closely, and data will be collected on adverse events (AEs) and serious adverse events (SAEs) throughout the  
 768 course of the study. All AEs and SAEs will be systematically recorded on case report forms and coded by the  
 769 CSP Clinical Research Pharmacy Coordinating Center (CSPCRPCC) at Albuquerque using the MedDRA  
 770 system. The MedDRA system employs standard terminology to present adverse events and to organize them by  
 771 body system. The incidence of adverse events will be summarized for each treatment group and overall, by  
 772 body system and MedDRA preferred term. The incidence differences between the control and  
 773

intervention groups for each event will be tested using the Pearson chi-square test or Fisher's Exact test. Table 12 illustrates how AE data may be presented for this study.

**Table 12. CS #2003 Cumulative Incidence of Adverse Events by Body System and MedDRA Term**

| Body System and Preferred Term           | SOC<br>(n = ?) | EAW + SOC<br>(n = ?) | All Participants<br>(N = ?) | p-value |
|------------------------------------------|----------------|----------------------|-----------------------------|---------|
|                                          | n (%)          | n (%)                | n (%)                       |         |
| All Adverse Events                       |                |                      |                             |         |
| Subjects with at least one Adverse Event |                |                      |                             |         |
|                                          |                |                      |                             |         |
| Body System 1                            |                |                      |                             |         |
| Event 1                                  |                |                      |                             |         |
| Event 2                                  |                |                      |                             |         |
| Event 3                                  |                |                      |                             |         |
| .                                        |                |                      |                             |         |
| .                                        |                |                      |                             |         |
| .                                        |                |                      |                             |         |
| Body System 2                            |                |                      |                             |         |
| Event 7                                  |                |                      |                             |         |
| Event 8                                  |                |                      |                             |         |
| Event 9                                  |                |                      |                             |         |
| Event 10                                 |                |                      |                             |         |
| .                                        |                |                      |                             |         |
| .                                        |                |                      |                             |         |
| .                                        |                |                      |                             |         |
| Body System N                            |                |                      |                             |         |
| Event 14                                 |                |                      |                             |         |
| Event 15                                 |                |                      |                             |         |
| Event 16                                 |                |                      |                             |         |
| .                                        |                |                      |                             |         |
| .                                        |                |                      |                             |         |
| .                                        |                |                      |                             |         |
| Event N                                  |                |                      |                             |         |

It is the responsibility of the CSPCC Study Team to provide the DMC with whatever information they feel they need to successfully monitor the study. Thus, additional tables will be added as required. In addition to the reports for the yearly meetings, the DMC will also be provided with reports between meetings at 6-month intervals.

## CSP #2003 (Exoskeletal-Assisted Walking in Persons with SCI: Impact on Quality of Life)

## Interim Analysis

March 5, 2019

As specified in the Statistical Analysis Plan (Section XIII) of the protocol, one interim look at the primary and major secondary outcome measures (in addition to the final “look” at study’s end) was proposed to occur when 80, or 50%, of patients had completed their participation in the study. As of March 5, 2019, 86 participants had completed the study. Thus, we have performed the one interim look of the primary and major secondary outcome measures, success or failure at achieving the following (change from baseline to the end of the 4-month intervention phase):

- $\geq 4$ -point Improvement in the VR-36 Mental Component Summary (primary)
- $\geq 10\%$  Improvement in the Sum T-Score of the SCI-QOL Physical Medical Health (PMH) Domain (primary)
- $\geq 1$  kg. Total Body Fat Loss (major secondary)

VR-36 Mental Component Summary (primary outcome)

Table III-6a provides the frequencies of success and failure at achieving at least a 4-point improvement in the VR-36 Mental Component Summary (MCS) from baseline to the end of the 4-month Intervention phase of the study. As the table shows, the EAW and SOC groups had 8 successes each. The chi-square test did not find a significant difference between the groups ( $p=0.918$ ). Figure III-1 provides the two-sided O’Brien-Fleming boundaries for rejection and acceptance regions for the two looks (interim and final). At this interim look, the standardized Z-score corresponding to the chi-square test was 0.103. As the figure illustrates, this point falls in the acceptance region. Table III-6b shows the frequency table for those participants that fully completed the study (no early terminators). The chi-square test again showed no difference between the groups ( $p=0.360$ ). Descriptive statistics for the VR-36 MCS by time point and treatment group are provided in Table III-6c while Table III-6d gives statistics on the change from baseline to each of the time points at which the outcome was assessed. As a secondary analysis, differences between the groups were assessed at each time point using a paired t-test.

SCI-QOL Physical Medical Health (PMH) Domain (primary outcome)

Table III-7a provides the frequencies of success and failure at achieving at least a 10% improvement in the SCI-QOL Physical Medical Health Domain (bladder management difficulties, bowel management difficulties and pain interference item banks) sum T-score from baseline to the end of the 4-month Intervention phase of the study. As the table shows, of the 42 participants in the EAW group, 5 were successes (11.9%) while 8 of 44 (18.2%) in the SOC group were successful at achieving at least a 10% improvement in the measure. The chi-square test did not find a significant difference between the groups ( $p=0.417$ ). Figure III-2 provides the two-sided O’Brien-Fleming boundaries for rejection and acceptance regions for the two looks (interim and final). At this interim look, the standardized Z-score corresponding to the chi-square test was 0.812. As the figure illustrates, this point falls in the “no decision” zone of the graph. Table III-7b shows the frequency table for those participants that fully completed the

study (no early terminators). The chi-square test again shows no difference between the groups ( $p=0.878$ ). Descriptive statistics for the SCI-QOL PMH by time point and treatment group are provided in Table III-7c while Table III-7d gives statistics on the change from baseline to each of the time points at which the outcome was assessed. As a secondary analysis, differences between the groups were assessed at each time point using a paired t-test.

#### Total Body Fat (major secondary outcome)

Table III-8a provides the frequencies of success and failure at achieving at least a 1 kg. loss in total body fat from baseline to the end of the 4-month Intervention phase of the study. As the table shows, of the 42 participants in the EAW group, 6 were successes (14.3%) while 10 of 44 (22.7%) in the SOC group were successful at achieving at least a 1 kg. loss in total body fat. The chi-square test did not find a significant difference between the groups ( $p=0.315$ ). Figure III-3 provides the two-sided O'Brien-Fleming boundaries for rejection and acceptance regions for the two looks (interim and final). At this interim look, the standardized Z-score corresponding to the chi-square test was 1.006. As the figure illustrates, this point falls in the "no decision" zone of the graph. Table III-8b shows the frequency table for those participants that fully completed the study (no early terminators). The chi-square test again shows no difference between the groups ( $p=0.789$ ). Descriptive statistics for total body fat by time point and treatment group are provided in Table III-8c while Table III-8d gives statistics on the change from baseline to each of the time points at which the outcome was assessed. As a secondary analysis, differences between the groups were assessed at each time point using a paired t-test.

**PRIVILEGED AND CONFIDENTIAL**  
**Not to be Disseminated Beyond Official Use**

**CSP 2003 Exoskeletal-Assisted Walking in Persons with SCI: Impact on Quality of Life**  
**Table III-6a Veterans RAND 36 Item Health Survey: Improvement in the Mental Component Summary (MCS) from Baseline to End of 4 Month Intervention,**  
**by Treatment Group**

|                                 | <b>EAW<br/>(n= 42)</b> |                  | <b>SOC<br/>(n= 44)</b> |              | <b>Total<br/>(n= 86)</b> |                |
|---------------------------------|------------------------|------------------|------------------------|--------------|--------------------------|----------------|
| <b>≥4 Point<br/>Improvement</b> | <b>n (%)</b>           | <b>n (%)</b>     | <b>n (%)</b>           | <b>n (%)</b> | <b>n (%)</b>             | <b>P-value</b> |
| <b>Success</b>                  | 8 (19.0)               | 8 (18.2)         | 16 (18.6)              | 0.918        |                          |                |
| <b>Failure</b>                  | 34 (81.0)              | 36 (81.8)        | 70 (81.4)              |              |                          |                |
| <b>Total</b>                    | <b>42 (48.8)</b>       | <b>44 (51.2)</b> | <b>86 (100.0)</b>      |              |                          |                |

SAS program: P2003-J16\_J19-VR36-V1 Calculated: 05APR19 15:15 (Data update: 05MAR2019)  
 T:\P2003\Reports\DMCIDMC-2019-03-05\Tables\Interim\_analysis\VR36\_PrimaryOutcome-05APR19.doc



Figure III-1 Two-sided O'Brien-Fleming Boundaries for Rejection and Acceptance Regions for MCS/VR36

The SEQTEST Procedure

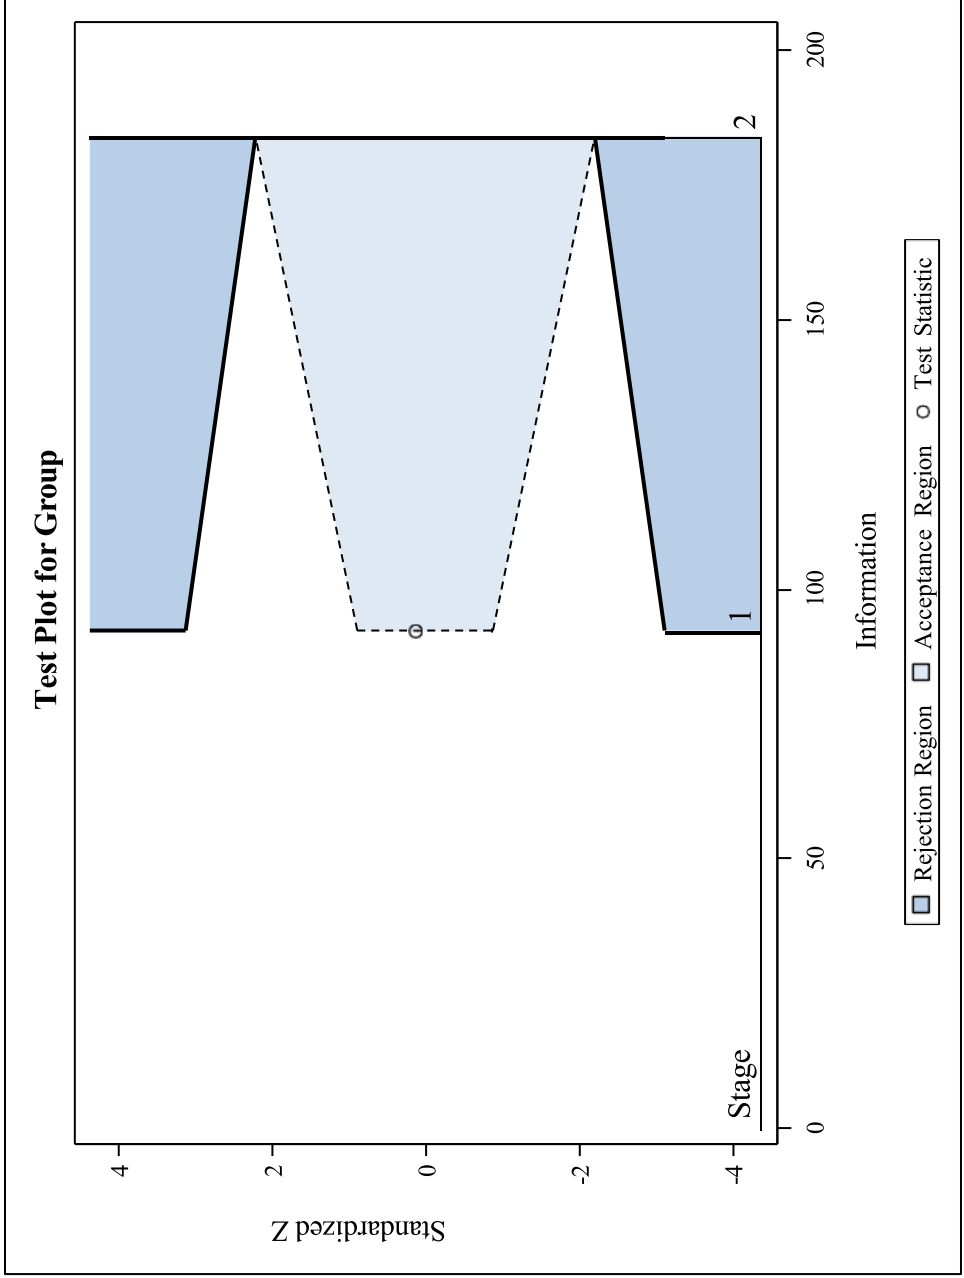

**CSP 2003 Exoskeletal-Assisted Walking in Persons with SCI: Impact on Quality of Life**  
**Table III-6b Veterans RAND 36 Item Health Survey: Improvement in the Mental Component Summary (MCS) from Baseline to End of 4 Month Intervention, by Treatment Group, in Participants Who Completed the 4 Month Intervention Phase**

|                      | EAW<br>(n= 25)   |                  | SOC<br>(n= 37)    |       | Total<br>(n= 62) |       | P-value |
|----------------------|------------------|------------------|-------------------|-------|------------------|-------|---------|
| ≥4 Point Improvement | n (%)            | n (%)            | n (%)             | n (%) | n (%)            | n (%) |         |
| Success              | 8 (32.0)         | 8 (21.6)         | 16 (25.8)         |       |                  |       | 0.360   |
| Failure              | 17 (68.0)        | 29 (78.4)        | 46 (74.2)         |       |                  |       |         |
| <b>Total</b>         | <b>25 (40.3)</b> | <b>37 (59.7)</b> | <b>62 (100.0)</b> |       |                  |       |         |

**CSP 2003 Exoskeletal-Assisted Walking in Persons with SCI: Impact on Quality of Life**  
**Table III-6c Veterans RAND 36 Item Health Survey: Mental Component Summary (MCS) by Time Point and Treatment Group**

| Time Point                         | EAW<br>(n= 53) |      |       |        |      |      | SOC<br>(n= 50) |      |       |        |      |      |
|------------------------------------|----------------|------|-------|--------|------|------|----------------|------|-------|--------|------|------|
|                                    | N              | Mean | SD    | Median | Min  | Max  | N              | Mean | SD    | Median | Min  | Max  |
| Baseline                           | 52             | 61.1 | 11.17 | 65.8   | 28.3 | 72.1 | 48             | 58.4 | 11.13 | 62.5   | 23.9 | 74.2 |
| Post-Training/Orientation          | 31             | 64.8 | 7.26  | 67.0   | 37.4 | 73.8 | 37             | 58.3 | 10.32 | 62.3   | 29.9 | 70.3 |
| Two Months into Intervention Phase | 28             | 63.5 | 9.30  | 67.0   | 29.8 | 74.7 | 36             | 58.3 | 12.42 | 64.1   | 25.6 | 75.6 |
| Post-Intervention Phase            | 25             | 63.3 | 9.89  | 64.9   | 30.3 | 76.7 | 37             | 57.2 | 12.94 | 61.1   | 26.4 | 72.8 |

**CSP 2003 Exoskeletal-Assisted Walking in Persons with SCI: Impact on Quality of Life**  
**Table III-6d Veterans RAND 36 Item Health Survey: Change in Mental Component Summary (MCS) from Baseline, by Treatment Group**

| Time Point                         | EAW<br>(n= 53) |      |       |        |     | SOC<br>(n= 50) |    |      |      |        | P-value |      |       |
|------------------------------------|----------------|------|-------|--------|-----|----------------|----|------|------|--------|---------|------|-------|
|                                    | N              | Mean | SD    | Median | Min | Max            | N  | Mean | SD   | Median |         | Min  | Max   |
| Post-Training/Orientation          | 31             | 1.5  | 11.69 | 0.5    | -28 | 32.7           | 35 | -0.2 | 6.29 | 0.0    | -14     | 15.8 | 0.468 |
| Two Months into Intervention Phase | 28             | 0.6  | 8.40  | 1.1    | -18 | 26.4           | 34 | 0.4  | 7.57 | 0.7    | -21     | 14.1 | 0.948 |
| Post-Intervention Phase            | 25             | 0.8  | 10.54 | 1.0    | -27 | 29.3           | 35 | -1.5 | 9.61 | 1.5    | -34     | 16.1 | 0.375 |

**CSP 2003 Exoskeletal-Assisted Walking in Persons with SCI: Impact on Quality of Life**  
**Table III-7a SCI-QOL Physical Health Domain: Improvement in the Sum T-Score from Baseline to End of 4 Month Intervention, by Treatment Group**

| ≥10 Percent Improvement | EAW<br>(N= 42)   |                  | SOC<br>(N= 44)    |       | Total<br>(N= 86) |       | P-value |
|-------------------------|------------------|------------------|-------------------|-------|------------------|-------|---------|
|                         | N (%)            | N (%)            | N (%)             | N (%) | N (%)            | N (%) |         |
| Success                 | 5 (11.9)         | 8 (18.2)         | 13 (15.1)         | 0.417 |                  |       |         |
| Failure                 | 37 (88.1)        | 36 (81.8)        | 73 (84.9)         |       |                  |       |         |
| <b>Total</b>            | <b>42 (48.8)</b> | <b>44 (51.2)</b> | <b>86 (100.0)</b> |       |                  |       |         |

*Figure III-2 Two-sided O'Brien-Fleming Boundaries for Rejection and Acceptance Regions for SCI-QOL Physical Medical Health Domain*

*The SEQTEST Procedure*

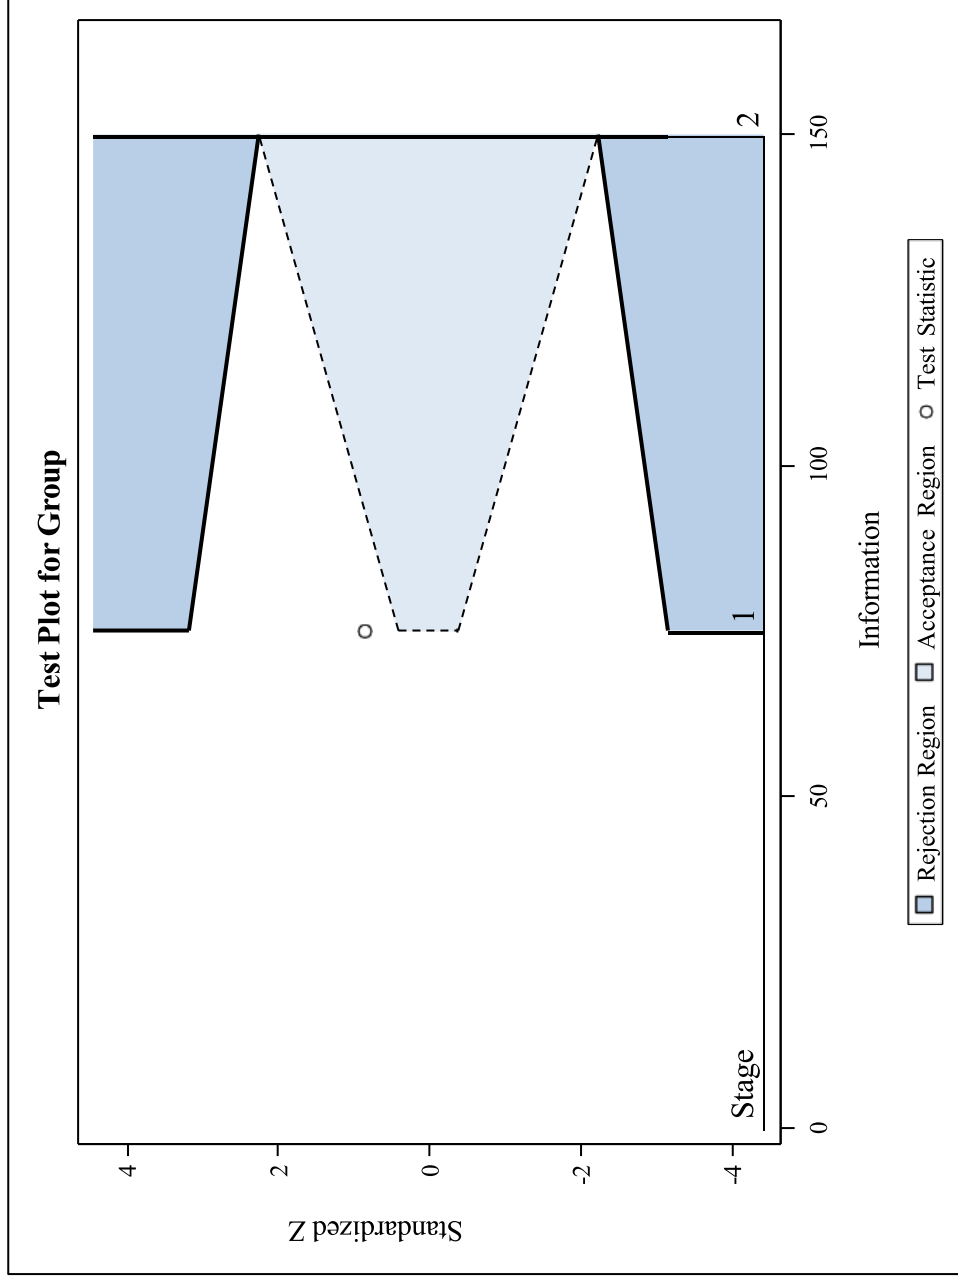

**CSP 2003 Exoskeletal-Assisted Walking in Persons with SCI: Impact on Quality of Life**  
**Table III-7b SCI-QOL Physical Medical Health Domain: Improvement in the Sum T-Score from Baseline to End of 4 Month Intervention, by Treatment Group, in Participants Who Completed the 4 Month Intervention Phase**

|                         | EAW<br>(N= 25)   |                  | SOC<br>(N= 37)    |       | Total<br>(N= 62) |         |
|-------------------------|------------------|------------------|-------------------|-------|------------------|---------|
| ≥10 Percent Improvement | n (%)            | n (%)            | n (%)             | n (%) | n (%)            | P-value |
| Success                 | 5 (20.0)         | 8 (21.6)         | 13 (21.0)         | 0.878 |                  |         |
| Failure                 | 20 (80.0)        | 29 (78.4)        | 49 (79.0)         |       |                  |         |
| <b>Total</b>            | <b>25 (40.3)</b> | <b>37 (59.7)</b> | <b>62 (100.0)</b> |       |                  |         |

**CSP 2003 Exoskeletal-Assisted Walking in Persons with SCI: Impact on Quality of Life**  
**Table III-7c SCI-QOL Physical Medical Health Domain: Sum T-Score by Time Point and Treatment Group**

| Time Point                         | EAW<br>(N= 53) |      |       |        |     |     | SOC<br>(N= 50) |      |       |        |     |     |
|------------------------------------|----------------|------|-------|--------|-----|-----|----------------|------|-------|--------|-----|-----|
|                                    | N              | Mean | SD    | Median | Min | Max | N              | Mean | SD    | Median | Min | Max |
| Baseline                           | 48             | 151  | 22.88 | 149    | 110 | 217 | 47             | 155  | 23.08 | 156    | 110 | 198 |
| Post-Training/Orientation          | 29             | 146  | 15.99 | 145    | 115 | 174 | 38             | 151  | 25.68 | 153    | 110 | 201 |
| Two Months into Intervention Phase | 25             | 147  | 20.77 | 154    | 110 | 179 | 33             | 153  | 23.31 | 155    | 118 | 195 |
| Post-Intervention Phase            | 23             | 143  | 19.71 | 143    | 110 | 175 | 36             | 148  | 26.76 | 141    | 110 | 206 |

**CSP 2003 Exoskeletal-Assisted Walking in Persons with SCI: Impact on Quality of Life**  
**Table III-7d SCI-QOL Physical Medical Health Domain: Change in Sum T-Score from Baseline by Treatment Group**

| Time Point                         | EAW<br>(N= 53) |      |       |        |     | SOC<br>(N= 50) |    |      |       |        | P-value |      |       |
|------------------------------------|----------------|------|-------|--------|-----|----------------|----|------|-------|--------|---------|------|-------|
|                                    | N              | Mean | SD    | Median | Min | Max            | N  | Mean | SD    | Median |         | Min  | Max   |
| Post-Training/Orientation          | 29             | -3.2 | 20.49 | -2.7   | -46 | 39.8           | 37 | -2.2 | 16.35 | -2.9   | -32     | 31.4 | 0.828 |
| Two Months into Intervention Phase | 23             | -4.1 | 18.10 | 0.0    | -47 | 26.5           | 31 | -2.7 | 15.81 | -2.6   | -33     | 29.6 | 0.771 |
| Post-Intervention Phase            | 21             | -7.6 | 21.89 | -4.4   | -62 | 22.1           | 35 | -3.4 | 19.94 | -2.9   | -44     | 32.4 | 0.470 |

**CSP 2003 Exoskeletal-Assisted Walking in Persons with SCI: Impact on Quality of Life**  
**Table III-8a Total Body Fat Loss from Baseline to End of 4 Month Intervention by Treatment Group**

| ≥1 KG loss   | EAW<br>(n= 42)   |                  | SOC<br>(n= 44)    |       | Total<br>(n= 86) |       | P-value |
|--------------|------------------|------------------|-------------------|-------|------------------|-------|---------|
|              | n (%)            | n (%)            | n (%)             | n (%) | n (%)            | n (%) |         |
| Success      | 6 (14.3)         | 10 (22.7)        | 16 (18.6)         | 0.315 |                  |       |         |
| Failure      | 36 (85.7)        | 34 (77.3)        | 70 (81.4)         |       |                  |       |         |
| <b>Total</b> | <b>42 (48.8)</b> | <b>44 (51.2)</b> | <b>86 (100.0)</b> |       |                  |       |         |

**Figure III-3 Two-sided O'Brien-Fleming Boundaries for Rejection and Acceptance Regions for Total Body Fat Mass**

*The SEQTEST Procedure*

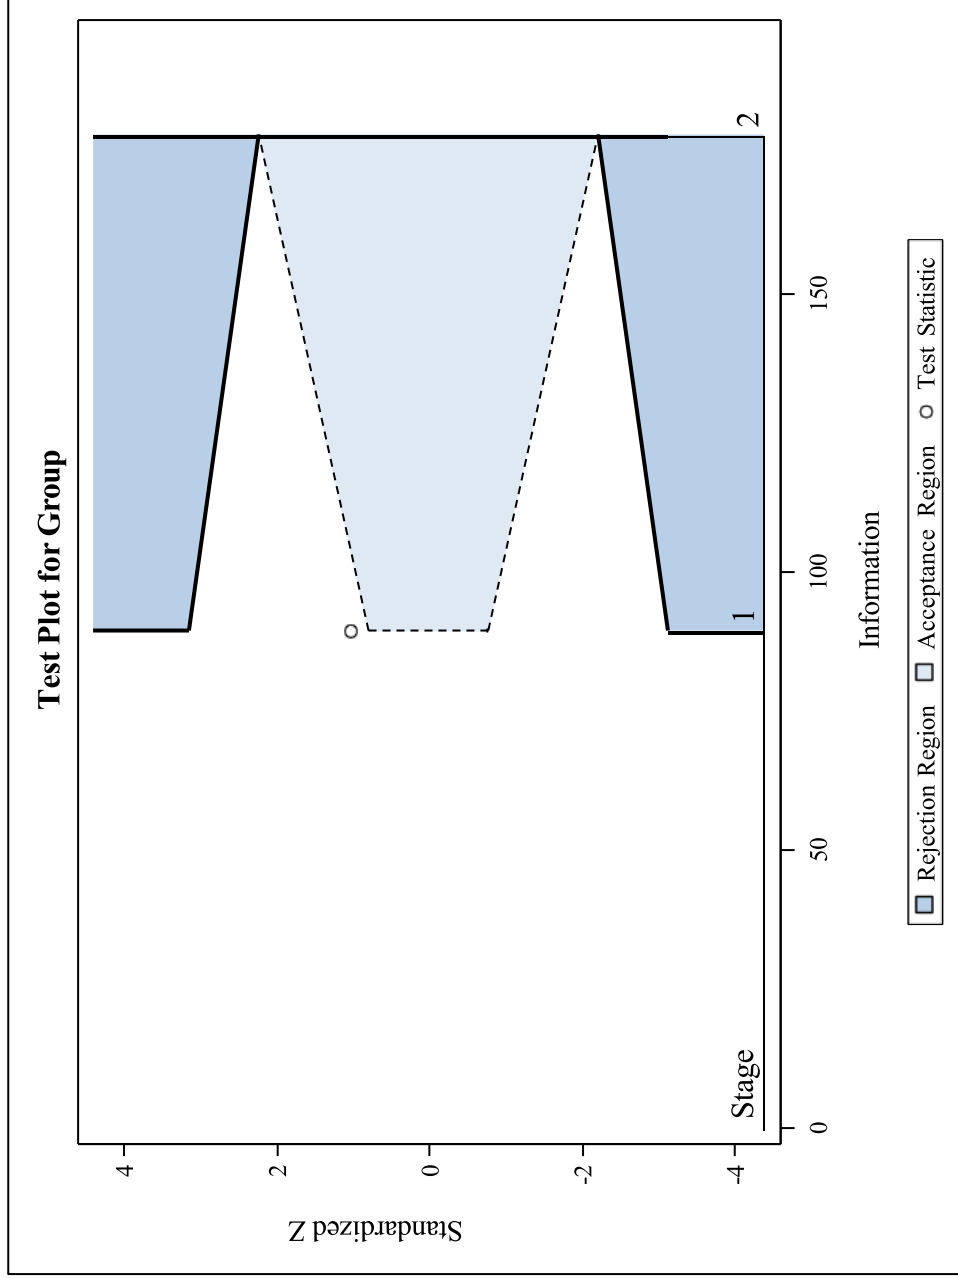

**CSP 2003 Exoskeletal-Assisted Walking in Persons with SCI: Impact on Quality of Life**  
**Table III-8b Total Body Fat Loss from Baseline to End of 4 Month Intervention, by Treatment Group, in Participants Who Completed the 4 Month Intervention Phase**

|              | EAW<br>(n= 25)   |                  | SOC<br>(n= 37)    |       | Total<br>(n= 62) |       | P-value |
|--------------|------------------|------------------|-------------------|-------|------------------|-------|---------|
|              | n (%)            | n (%)            | n (%)             | n (%) | n (%)            | n (%) |         |
| ≥1 KG loss   |                  |                  |                   |       |                  |       |         |
| Success      | 6 (24.0)         | 10 (27.0)        | 16 (25.8)         |       |                  |       | 0.789   |
| Failure      | 19 (76.0)        | 27 (73.0)        | 46 (74.2)         |       |                  |       |         |
| <b>Total</b> | <b>25 (40.3)</b> | <b>37 (59.7)</b> | <b>62 (100.0)</b> |       |                  |       |         |

**CSP 2003 Exoskeletal-Assisted Walking in Persons with SCI: Impact on Quality of Life**  
**Table III-8c Total Body Fat, in Kilograms, by Time Point and Treatment Group**

| Time Point                         | EAW<br>(n= 53) |      |       |        |     |      | SOC<br>(n= 50) |      |      |        |      |      |
|------------------------------------|----------------|------|-------|--------|-----|------|----------------|------|------|--------|------|------|
|                                    | N              | Mean | SD    | Median | Min | Max  | N              | Mean | SD   | Median | Min  | Max  |
| Baseline                           | 53             | 26.9 | 9.35  | 27.9   | 8.3 | 47.7 | 50             | 26.6 | 8.44 | 26.8   | 10.4 | 44.0 |
| Post-Training/Orientation          | 31             | 28.4 | 10.24 | 31.1   | 9.4 | 46.1 | 36             | 26.5 | 8.79 | 26.4   | 10.6 | 43.9 |
| Two Months into Intervention Phase | 27             | 28.7 | 10.59 | 28.7   | 9.0 | 46.6 | 34             | 26.1 | 9.23 | 26.6   | 2.9  | 39.1 |
| Post-Intervention Phase            | 25             | 28.9 | 10.63 | 28.9   | 9.0 | 46.9 | 36             | 26.6 | 7.49 | 27.0   | 10.1 | 39.4 |

**CSP 2003 Exoskeletal-Assisted Walking in Persons with SCI: Impact on Quality of Life**  
**Table III-8d Change in Total Body Fat, in Kilograms, from Baseline by Treatment Group**

| Time Point                         | EAW<br>(n= 53) |      |      |        |      |     | SOC<br>(n= 50) |      |      |        |      |     |         |
|------------------------------------|----------------|------|------|--------|------|-----|----------------|------|------|--------|------|-----|---------|
|                                    | N              | Mean | SD   | Median | Min  | Max | N              | Mean | SD   | Median | Min  | Max | P-value |
| Post-Training/Orientation          | 31             | 0.3  | 1.83 | 0.6    | -3.7 | 5.4 | 36             | 0.0  | 1.86 | -0.4   | -5.0 | 4.0 | 0.584   |
| Two Months into Intervention Phase | 27             | 0.7  | 2.84 | 0.9    | -5.7 | 7.2 | 34             | -1.1 | 5.66 | -0.3   | -28  | 6.9 | 0.110   |
| Post-Intervention Phase            | 25             | 0.3  | 3.47 | 0.7    | -11  | 6.1 | 36             | -0.1 | 3.80 | -0.3   | -12  | 7.9 | 0.682   |
