# Supplementary material for: Exoskeletal-Assisted Walking in Veterans With Paralysis: A Randomized Clinical Trial
Source: PubMed Central journal article supplement (PMC11375472; doi:10.1001/jamanetworkopen.2024.31501), 2024-09-04
Supplement: jamanetwopen-e2431501-s003.pdf [file jamanetwopen-e2431501-s003.pdf]

# Data Sharing Statement

Spungen. Exoskeletal-Assisted Walking in Veterans With Paralysis. *JAMA Netw Open*.  
Published September 04, 2024. doi:10.1001/jamanetworkopen.2024.31501

## Data

**Data available:** Yes

**Data types:** Deidentified participant data, Data dictionary

**How to access data:** Please direct inquiries to: Dr. Kousick Biswas, PhD Health Science Officer Director, CSP Coordinating Center, Perry Point VA Medical Center VA Maryland Health Care System, Building 362T, Room 101 Perry Point, MD 21902 [kousick.biswas@va.gov](mailto:kousick.biswas@va.gov) 410-642-2411, x25283

**When available:** With publication

## Supporting Documents

**Document types:** None

## Additional Information

**Who can access the data:** Per Department of Veterans Affairs Office of Research & Development Data Management and Access Plan (DMAP), Final data sets that are deidentified resulting from this research will be shared upon written request. Individually identifiable private information, protected health information (PHI), and other VA sensitive data will not be shared.

**Types of analyses:** Per Department of Veterans Affairs Office of Research & Development Data Management and Access Plan (DMAP), Final data sets that are de-identified resulting from this research will be shared upon written request. Individually identifiable private information, protected health information (PHI), and other VA sensitive data will not be shared.

**Mechanisms of data availability:** Per Department of Veterans Affairs Office of Research & Development Data Management and Access Plan (DMAP), Final data sets that are de-identified resulting from this research will be shared upon written request. Individually identifiable private information, protected health information (PHI), and other VA sensitive data will not be shared.

**Any additional restrictions:** Per Department of Veterans Affairs Office of Research & Development Data Management and Access Plan (DMAP), Final data sets that are de-identified resulting from this research will be shared upon written request. Individually identifiable private information, protected health information (PHI), and other VA sensitive data will not be shared.
